# Supplementary material for: Nickel-catalyzed stereospecific reductive cross-coupling of vinyl chlorosilanes with axially chiral biaryl electrophiles
Source: Royal Society of Chemistry journal article supplement (doi:10.1039/d4cc04293j), 2024-01-01
Supplement: d4cc04293j1.pdf [file d4cc04293j1.pdf]

## *Supplementary Information*

### **Nickel-Catalyzed Stereospecific Reductive Cross-coupling of Vinyl Chlorosilanes with Axially Chiral Biaryl Electrophiles**

Tiantian Yin,<sup>1</sup> Shiyuan Sui,<sup>1</sup> Shuqi Li,<sup>1</sup> Junbiao Chang,<sup>\* 1</sup> Dachang Bai<sup>\* 1</sup>

<sup>1</sup>State Key Laboratory of Antiviral Drugs, NMPA Key Laboratory for Research and Evaluation of Innovative Drug, School of Chemistry and Chemical Engineering, Pingyuan Laboratory, Henan Normal University, Xinxiang, Henan, 453007, China.

\*Corresponding Author(s): baidachang@htu.edu.cn; changjunbiao@zzu.edu.cn

## Table of Contents

|                                       |          |
|---------------------------------------|----------|
| 1. General Information .....          | S3       |
| 2. General Synthetic Procedures ..... | S3-S17   |
| 3. Synthetic Application.....         | S18-S31  |
| 4. X-Ray Crystallographic Data .....  | S32      |
| 5. Supplementary References .....     | S33      |
| 6. NMR Spectra and HPLC Spectra.....  | S34-S100 |

## 1. General Information

All chemicals were obtained from commercial sources and were used as received unless otherwise noted. All the reactions were carried out under argon atmosphere in a argon-filled glove box. The  $^1\text{H}$  NMR spectra were recorded on a 400 MHz or 600 MHz NMR spectrometer. The  $^{13}\text{C}$  NMR spectra were recorded at 101 MHz or 151 MHz. The  $^{19}\text{F}$  NMR spectra were recorded at 376 MHz or 565 MHz. The  $^{31}\text{P}$  NMR spectra were recorded at 243 MHz. Chemical shifts were expressed in parts per million ( $\delta$ ) downfield from the internal standard tetramethylsilane, and were reported as s (singlet), d (doublet), t (triplet), dd (doublet of doublet), dt (doublet of triplet), m (multiplet), brs (broad single), etc. The residual solvent signals were used as references and the chemical shifts were converted to the TMS scale. High resolution mass spectra were obtained on an Agilent Q-TOF 6540 spectrometer. Column chromatography was performed on silica gel (300-400 mesh). Thin layer chromatography was performed on pre-coated glass back plates and visualized with UV light at 254 nm. Flash column chromatography was performed on silica gel.

## 2. General Synthetic Procedures

**2.1 General procedure:** The procedure was conducted in an argon-filled glove box.  $(\text{DME})\text{NiCl}_2$  (2.20 mg, 0.01 mmol), **L4** (3.33 mg, 0.01 mmol) and Mn (16.50 mg, 0.3 mmol, 3.0 eq) in DMA (1.0 mL) were charged sequentially into a 25 mL pressure tube under argon. The reaction mixture was stirred for 30 min at room temperature. Then **1a** (40.24 mg, 0.1 mmol) and **2a** (36.20 mg, 0.3 mmol) were added to the reaction mixture. The reaction tube was sealed and stirred at 30 °C. After the reaction was completed (12 h), the reaction mixture was filtered through a pad of celite, eluted with ethyl acetate, concentrated, and purified by silica gel chromatography to give the indicated product **3a**.

## 2.2 Supplementary Table 1, Optimization of reaction conditions of **1a** and **2a**<sup>a</sup>.

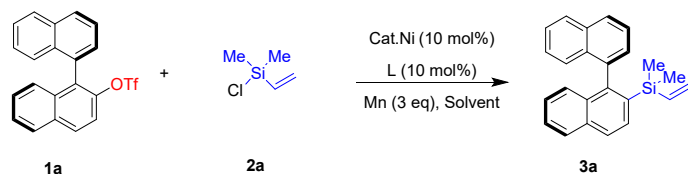

| Entry           | Cat.Ni                 | L                | Solvent            | T (°C) | Time (h) | Isolated yield (%)<br><b>3a</b> | ee (%)<br><b>3a</b> |
|-----------------|------------------------|------------------|--------------------|--------|----------|---------------------------------|---------------------|
| 1               | (DME)NiBr <sub>2</sub> | <b>L1</b>        | Toluene            | 50     | 60h      | NR                              | --                  |
| 2               | (DME)NiBr <sub>2</sub> | <b>L1</b>        | Dioxane            | 50     | 60h      | 16                              | 94                  |
| 3               | (DME)NiBr <sub>2</sub> | <b>L1</b>        | THF                | 50     | 60h      | NR                              | --                  |
| 4               | (DME)NiBr <sub>2</sub> | <b>L1</b>        | DMSO               | 50     | 60h      | NR                              | --                  |
| 5               | (DME)NiBr <sub>2</sub> | <b>L1</b>        | DCE                | 50     | 60h      | NR                              | --                  |
| 6               | (DME)NiBr <sub>2</sub> | <b>L1</b>        | CH <sub>3</sub> CN | 50     | 60h      | NR                              | --                  |
| 7               | (DME)NiBr <sub>2</sub> | <b>L1</b>        | EtOH               | 50     | 60h      | NR                              | --                  |
| 8               | (DME)NiBr <sub>2</sub> | <b>L1</b>        | DMF                | 50     | 60h      | 65                              | 97                  |
| 9               | (DME)NiBr <sub>2</sub> | <b>L1</b>        | DMA                | 50     | 60h      | 83                              | 97                  |
| 10 <sup>b</sup> | (DME)NiBr <sub>2</sub> | <b>L1</b>        | DMA                | 50     | 60h      | 16                              | 97                  |
| 11              | (DME)NiBr <sub>2</sub> | PPh <sub>3</sub> | DMA                | 50     | 60h      | NR                              | --                  |
| 12              | (DME)NiBr <sub>2</sub> | BINAP            | DMA                | 50     | 60h      | NR                              | --                  |
| 13              | (DME)NiBr <sub>2</sub> | <b>L2</b>        | DMA                | 50     | 60h      | 89                              | 97                  |
| 14              | (DME)NiBr <sub>2</sub> | <b>L3</b>        | DMA                | 50     | 60h      | 9                               | 97                  |
| 15              | (DME)NiBr <sub>2</sub> | <b>L4</b>        | DMA                | 50     | 60h      | 97                              | 97                  |
| 16              | (DME)NiBr <sub>2</sub> | <b>L5</b>        | DMA                | 50     | 60h      | 25                              | 97                  |
| 17              | (DME)NiBr <sub>2</sub> | <b>L6</b>        | DMA                | 50     | 60h      | 17                              | 97                  |
| 18              | (DME)NiBr <sub>2</sub> | <b>L7</b>        | DMA                | 50     | 60h      | 63                              | 97                  |
| 19              | (DME)NiBr <sub>2</sub> | <b>L8</b>        | DMA                | 50     | 60h      | 88                              | 97                  |
| 20              | (DME)NiBr <sub>2</sub> | <b>L4</b>        | DMA                | 30     | 60h      | 96                              | 97                  |
| 21              | (DME)NiCl <sub>2</sub> | <b>L4</b>        | DMA                | 30     | 60h      | 99                              | 97                  |
| 22              | NiCl <sub>2</sub>      | <b>L4</b>        | DMA                | 30     | 60h      | 95                              | 97                  |
| 23              | Ni(cod) <sub>2</sub>   | <b>L4</b>        | DMA                | 30     | 60h      | 98                              | 97                  |
| 24              | Ni(acac) <sub>2</sub>  | <b>L4</b>        | DMA                | 30     | 60h      | 98                              | 97                  |
| 25              | (DME)NiCl <sub>2</sub> | <b>L4</b>        | DMA                | 30     | 24h      | 99                              | 97                  |
| 26              | (DME)NiCl <sub>2</sub> | <b>L4</b>        | DMA                | 30     | 12h      | 99                              | 97                  |
| 27              | (DME)NiCl <sub>2</sub> | <b>L4</b>        | DMA                | 30     | 3h       | 99                              | 97                  |
| 28 <sup>c</sup> | (DME)NiCl <sub>2</sub> | <b>L4</b>        | DMA                | 30     | 12h      | 55                              | 97                  |
| 29              | --                     | <b>L4</b>        | DMA                | 30     | 60h      | NR                              | --                  |

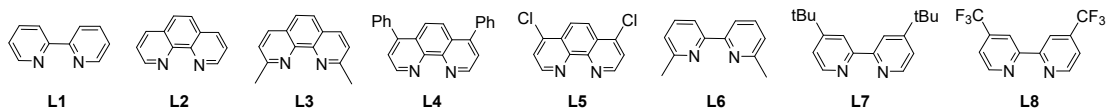

<sup>a</sup> Reaction conditions: **1a** (0.1 mmol), **2a** (0.3 mmol), [Ni] (10 mol%), **L** (10 mol%), Mn (3.0 eq) in solvent (1.0 mL), argon.

Determined by HPLC analysis.<sup>b</sup> Zn instead of Mn.<sup>c</sup> (DME)NiCl<sub>2</sub> (5 mol%), **L4** (5 mol%).

### 2.3 Synthesis of Substrates and characterization of products

The starting materials aryl trifluoromethanesulfonates **1a**<sup>1</sup>, **1b-1c**<sup>2</sup>, **1d-1l**<sup>3</sup>, **1m**<sup>4</sup>, **1n-1q**<sup>5</sup>, **1r**<sup>6</sup>, **1s**<sup>7</sup>, **1t**<sup>8</sup> were synthesized according to the literature procedure.

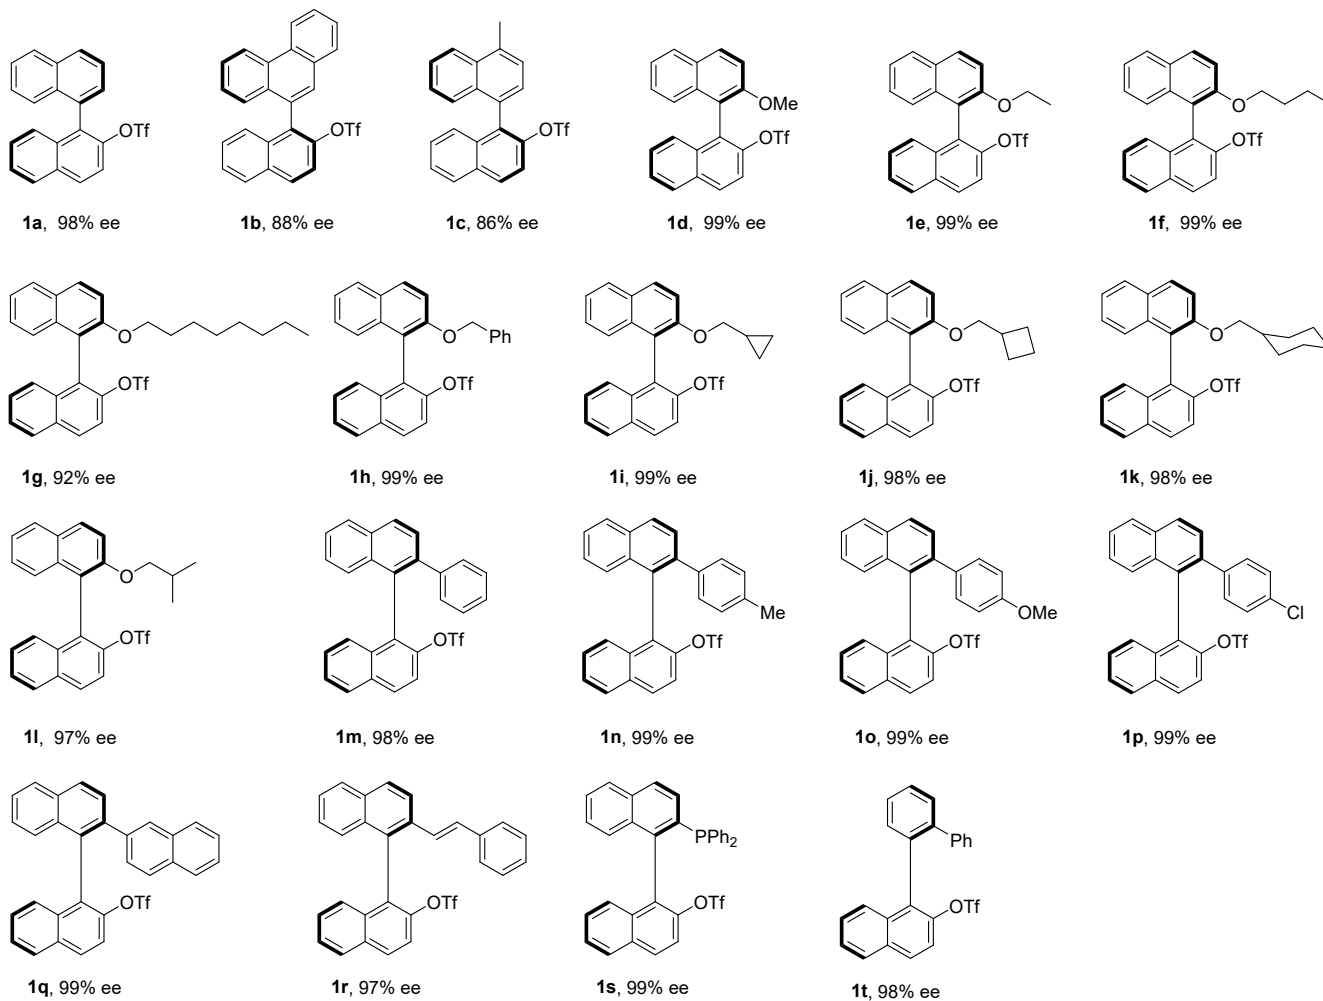

The characterization data of axially chiral vinylsilanes are provided as follows:

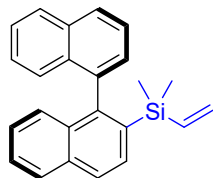

**3a**

**3a**, colorless oil. 33.85 mg, 99% yield, 97% ee, HPLC analysis on a Chiralcel OD-H column (hexane, flow rate 1.0 mL/min):  $t_R = 8.6$  min (minor),  $t_R = 13.8$  min (major).  $[\alpha]_D^{19} = -22.9$  (c 1.00,  $\text{CHCl}_3$ ).  $^1\text{H}$  NMR (400 MHz,  $\text{CDCl}_3$ )  $\delta$  7.93 - 7.86 (m, 4H), 7.78 (d,  $J = 8.2$  Hz, 1H), 7.56 - 7.52 (m, 1H), 7.42 (dd,  $J = 16.0, 6.8$  Hz, 3H), 7.24 - 7.15 (m, 4H), 5.85 (dd,  $J = 20.0, 14.6$  Hz, 1H), 5.68 (dd,  $J = 14.6, 3.8$  Hz, 1H), 5.39 (dd,  $J = 20.0, 3.8$  Hz, 1H), -0.18 (s, 3H), -0.22 (s, 3H).  $^{13}\text{C}$  NMR (101 MHz,  $\text{CDCl}_3$ )  $\delta$  145.3, 139.2, 138.8, 136.1, 134.1, 133.7, 133.4, 133.2, 131.2, 131.2, 128.8, 128.2, 128.1, 127.9, 127.1, 127.1, 126.9, 126.4, 126.0, 125.9, 125.2, -1.8, -1.9. HRMS (ESI, m/z): calcd for  $\text{C}_{24}\text{H}_{22}\text{NaSi}^+$   $[\text{M} + \text{Na}]^+$ : 361.1383, found 361.1386.

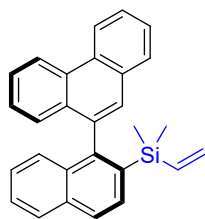

**3b**

**3b**, colorless oil. 38.09 mg, 98% yield, 87% ee, HPLC analysis on a Chiralcel OD-H column (hexane/isopropanol = 99/1, flow rate 1.0 mL/min):  $t_R = 4.4$  min (major),  $t_R = 5.3$  min (minor).  $[\alpha]_D^{20} = 6.3$  (c 1.00,  $\text{CHCl}_3$ ).  $^1\text{H}$  NMR (400 MHz,  $\text{CDCl}_3$ )  $\delta$  8.78 (d,  $J = 8.2$  Hz, 2H), 7.95 - 7.80 (m, 4H), 7.73 - 7.68 (m, 2H), 7.65 - 7.59 (m, 2H), 7.45 - 7.41 (m, 1H), 7.35 - 7.31 (m, 1H), 7.27 - 7.22 (m, 2H), 7.19 - 7.15 (m, 1H), 5.88 (dd,  $J = 20.2, 14.6$  Hz, 1H), 5.63 (dd,  $J = 14.6, 3.6$  Hz, 1H), 5.34 (dd,  $J = 20.2, 3.6$  Hz, 1H), -0.12 (s, 3H), -0.20 (s, 3H).  $^{13}\text{C}$  NMR (101 MHz,  $\text{CDCl}_3$ )  $\delta$  145.3, 138.8, 137.8, 136.3, 133.8, 133.4, 133.2, 131.5, 131.3, 131.2, 130.5, 130.2, 129.7, 128.8, 128.0, 127.9, 127.2, 127.0, 126.9, 126.7, 126.6, 126.4, 126.1, 122.8, -1.6, -1.9. HRMS (ESI, m/z): calcd for  $\text{C}_{28}\text{H}_{25}\text{Si}^+$   $[\text{M} + \text{H}]^+$ : 389.1720, found 389.1712.

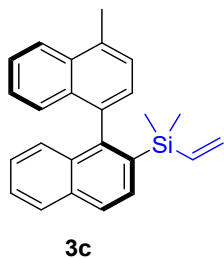

**3c**, colorless oil. 35.25 mg, 99% yield, 86% ee, HPLC analysis on a Chiralcel OD-H column (hexane, flow rate 1.0 mL/min):  $t_R = 7.7$  min (major),  $t_R = 11.9$  min (minor).  $[\alpha]_D^{20} = 17.5$  (c 1.00,  $\text{CHCl}_3$ ).  $^1\text{H}$  NMR (400 MHz,  $\text{CDCl}_3$ )  $\delta$  8.07 (d,  $J = 8.6$  Hz, 1H), 7.88 (dd,  $J = 13.0, 8.2$  Hz, 2H), 7.77 (d,  $J = 8.2$  Hz, 1H), 7.49-7.38 (m, 3H), 7.28 (d,  $J = 7.0$  Hz, 1H), 7.22-7.17 (m, 4H), 5.87 (dd,  $J = 20.0, 14.6$  Hz, 1H), 5.69 (dd,  $J = 14.6, 3.8$  Hz, 1H), 5.41 (dd,  $J = 20.0, 3.8$  Hz, 1H), 2.80 (s, 3H), -0.19 (s, 3H), -0.22 (s, 3H).  $^{13}\text{C}$  NMR (101 MHz,  $\text{CDCl}_3$ )  $\delta$  145.7, 139.0, 137.4, 136.2, 134.5, 134.2, 133.7, 133.4, 132.6, 131.3, 131.2, 128.5, 127.9, 127.8, 127.2, 126.8, 126.3, 126.0, 125.9, 125.7, 125.6, 124.3, 19.8, -1.7, -1.8. HRMS (ESI, m/z): calcd for  $\text{C}_{25}\text{H}_{24}\text{NaSi}^+$   $[\text{M} + \text{Na}]^+$ : 375.1539, found 375.1548.

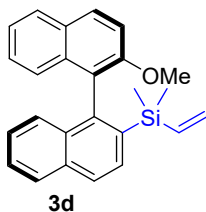

**3d**, colorless oil. 36.81 mg, 99% yield, 98% ee, HPLC analysis on a Chiralcel OD-H column (hexane, flow rate 1.0 mL/min):  $t_R = 10.3$  min (minor),  $t_R = 12.2$  min (major).  $[\alpha]_D^{19} = 8.4$  (c 1.00,  $\text{CHCl}_3$ ).  $^1\text{H}$  NMR (400 MHz,  $\text{CDCl}_3$ )  $\delta$  7.97 (d,  $J = 9.0$  Hz, 1H), 7.92 – 7.79 (m, 4H), 7.44 - 7.40 (m, 1H), 7.36 (d,  $J = 9.0$  Hz, 1H), 7.29 – 7.26 (m, 1H), 7.19 – 7.13 (m, 3H), 6.92 (d,  $J = 8.6$  Hz, 1H), 5.80 (dd,  $J = 20.0, 14.6$  Hz, 1H), 5.65 (dd,  $J = 14.6, 4.0$  Hz, 1H), 5.35 (dd,  $J = 20.0, 4.0$  Hz, 1H), 3.72 (s, 3H), -0.19 (s, 3H), -0.20 (s, 3H).  $^{13}\text{C}$  NMR (101 MHz,  $\text{CDCl}_3$ )  $\delta$  155.0, 141.6, 138.7, 136.6, 135.3, 134.0, 133.1, 131.5, 130.7, 129.7, 128.8, 128.0, 127.8, 126.7, 126.4, 126.4, 126.3, 126.0, 123.6, 123.5, 113.0, 55.8, -2.1, -2.2. HRMS (ESI, m/z): calcd for  $\text{C}_{25}\text{H}_{24}\text{NaOSi}^+$   $[\text{M} + \text{Na}]^+$ : 391.1489, found 391.1490.

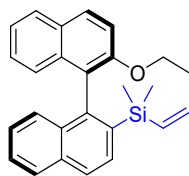

**3e**

**3e**, colorless oil. 38.21 mg, 99% yield, 99% ee, HPLC analysis on a Chiralcel OD-H column (hexane, flow rate 1.0 mL/min):  $t_R = 9.7$  min (minor),  $t_R = 11.5$  min (major).  $[\alpha]_D^{20} = 13.6$  (c 1.00,  $\text{CHCl}_3$ ).  $^1\text{H}$  NMR (400 MHz,  $\text{CDCl}_3$ )  $\delta$  7.86 – 7.69 (m, 5H), 7.35 – 7.31 (m, 1H), 7.25 (d,  $J = 9.0$  Hz, 1H), 7.18 (t,  $J = 7.2$  Hz, 1H), 7.10 – 7.08 (m, 2H), 7.05 (t,  $J = 7.4$  Hz, 1H), 6.84 (d,  $J = 8.4$  Hz, 1H), 5.74 (dd,  $J = 20.0$ , 14.6 Hz, 1H), 5.57 (dd,  $J = 14.6$ , 3.8 Hz, 1H), 5.29 (dd,  $J = 20.0$ , 3.8 Hz, 1H), 3.91 (q,  $J = 7.0$  Hz, 2H), 0.96 (t,  $J = 7.0$  Hz, 3H), -0.26 (s, 3H), -0.28 (s, 3H).  $^{13}\text{C}$  NMR (101 MHz,  $\text{CDCl}_3$ )  $\delta$  154.4, 141.8, 138.8, 136.6, 135.4, 133.9, 133.1, 131.5, 130.7, 129.5, 128.8, 127.9, 127.7, 126.6, 126.5, 126.3, 126.2, 126.0, 125.8, 124.1, 123.5, 114.4, 64.2, 15.1, -2.2, -2.2. HRMS (ESI,  $m/z$ ): calcd for  $\text{C}_{26}\text{H}_{26}\text{NaOSi}^+$   $[\text{M} + \text{Na}]^+$ : 405.1645, found 405.1646.

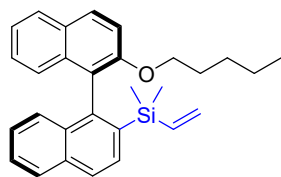

**3f**

**3f**, colorless oil. 42.46 mg, 99% yield, 99% ee, HPLC analysis on a Chiralcel OD-H column (hexane, flow rate 1.0 mL/min):  $t_R = 7.7$  min (minor),  $t_R = 8.1$  min (major).  $[\alpha]_D^{21} = 19.2$  (c 1.00,  $\text{CHCl}_3$ ).  $^1\text{H}$  NMR (400 MHz,  $\text{CDCl}_3$ )  $\delta$  7.94 – 7.76 (m, 5H), 7.43 – 7.39 (m, 1H), 7.33 (d,  $J = 9.0$  Hz, 1H), 7.29 – 7.25 (m, 1H), 7.18 – 7.13 (m, 3H), 6.98 (d,  $J = 8.4$  Hz, 1H), 5.81 (dd,  $J = 20.0$ , 14.6 Hz, 1H), 5.65 (dd,  $J = 14.6$ , 4.0 Hz, 1H), 5.36 (dd,  $J = 20.0$ , 4.0 Hz, 1H), 3.96 – 3.82 (m, 2H), 1.42 – 1.34 (m, 2H), 1.00 – 0.94 (m, 2H), 0.91 – 0.85 (m, 2H), 0.60 (t,  $J = 7.2$  Hz, 3H), -0.18 (s, 3H), -0.21 (s, 3H).  $^{13}\text{C}$  NMR (101 MHz,  $\text{CDCl}_3$ )  $\delta$  154.7, 141.7, 138.8, 136.5, 135.3, 134.0, 133.2, 131.4, 130.7, 129.5, 128.8, 127.8, 127.7, 126.5, 126.4, 126.2, 126.1, 126.0, 125.7, 124.4, 123.5, 114.6, 68.9, 29.1, 28.0, 22.2, 14.0, -2.1, -2.2. HRMS (ESI,  $m/z$ ): calcd for  $\text{C}_{29}\text{H}_{32}\text{NaOSi}^+$   $[\text{M} + \text{Na}]^+$ : 447.2115, found 447.2119.



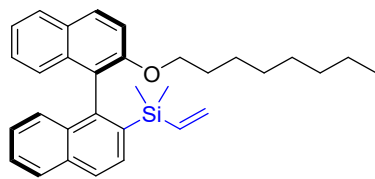

**3g**

**3g**, colorless oil. 46.67 mg, 99% yield, 91% ee, HPLC analysis on a Chiralcel OD-H column (hexane, flow rate 1.0 mL/min):  $t_R = 8.1$  min (minor),  $t_R = 8.8$  min (major).  $[\alpha]_D^{21} = 15.5$  (c 1.00,  $\text{CHCl}_3$ ).  $^1\text{H}$  NMR (600 MHz,  $\text{CDCl}_3$ )  $\delta$  7.93 (d,  $J = 9.0$  Hz, 1H), 7.87 (dd,  $J = 14.2, 8.2$  Hz, 2H), 7.82 (d,  $J = 8.2$  Hz, 1H), 7.77 (d,  $J = 8.2$  Hz, 1H), 7.42 – 7.39 (m, 1H), 7.33 (d,  $J = 9.0$  Hz, 1H), 7.27 (t,  $J = 7.4$  Hz, 1H), 7.18 – 7.13 (m, 3H), 6.97 (d,  $J = 8.6$  Hz, 1H), 5.81 (dd,  $J = 20.2, 14.6$  Hz, 1H), 5.65 (dd,  $J = 14.6, 3.8$  Hz, 1H), 5.36 (dd,  $J = 20.2, 3.8$  Hz, 1H), 3.95 – 3.83 (m, 2H), 1.40 – 1.34 (m, 2H), 1.22 – 1.18 (m, 2H), 1.08 – 1.03 (m, 2H), 0.99 – 0.92 (m, 4H), 0.90 – 0.87 (m, 2H), 0.84 (t,  $J = 7.2$  Hz, 3H), -0.18 (s, 3H), -0.21 (s, 3H).  $^{13}\text{C}$  NMR (101 MHz,  $\text{CDCl}_3$ )  $\delta$  154.7, 141.8, 138.9, 136.6, 135.3, 134.0, 133.2, 131.4, 130.7, 129.5, 128.9, 127.9, 127.8, 126.6, 126.5, 126.3, 126.1, 126.1, 125.7, 124.5, 123.5, 114.7, 68.9, 31.8, 29.4, 29.2, 29.1, 25.7, 22.8, 14.2, -2.1, -2.1. HRMS (ESI,  $m/z$ ): calcd for  $\text{C}_{32}\text{H}_{38}\text{NaOSi}^+$   $[\text{M} + \text{Na}]^+$ : 489.2584, found 489.2592.

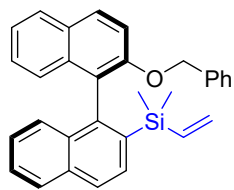

**3h**

**3h**, colorless oil. 44.46 mg, 99% yield, 99% ee, HPLC analysis on a Chiralcel OD-H column (hexane, flow rate 1.0 mL/min):  $t_R = 22.1$  min (minor),  $t_R = 25.1$  min (major).  $[\alpha]_D^{21} = 0.9$  (c 1.00,  $\text{CHCl}_3$ ).  $^1\text{H}$  NMR (400 MHz,  $\text{CDCl}_3$ )  $\delta$  7.93 – 7.88 (m, 3H), 7.82 - 7.80 (m, 2H), 7.45 – 7.41 (m, 1H), 7.35 – 7.27 (m, 2H), 7.23 – 7.12 (m, 6H), 7.03 – 7.00 (d,  $J = 8.4$  Hz, 1H), 6.95 – 6.92 (m, 2H), 5.80 (dd,  $J = 20.0, 14.6$  Hz, 1H), 5.63 (dd,  $J = 14.6, 4.0$  Hz, 1H), 5.34 (dd,  $J = 20.0, 4.0$  Hz, 1H), 5.06 – 5.00 (m, 2H), -0.18 (s, 6H).  $^{13}\text{C}$  NMR (101 MHz,  $\text{CDCl}_3$ )  $\delta$  154.2, 141.5, 138.7, 137.7, 136.7, 135.3, 134.0, 133.1, 131.5, 130.8, 129.6, 129.1, 128.3, 128.0, 127.8, 127.4, 126.7, 126.5, 126.4, 126.3, 126.1, 125.9, 124.8, 123.8,

115.0, 70.4, -2.1, -2.1. HRMS (ESI, m/z): calcd for  $C_{31}H_{28}NaOSi^+$   $[M + Na]^+$ : 467.1802, found 467.1807.

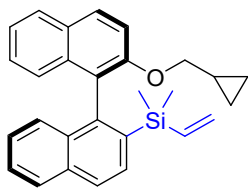

**3i**

**3i**, colorless oil. 40.86 mg, 98% yield, 99% ee, HPLC analysis on a Chiralcel OD-H column (hexane, flow rate 1.0 mL/min):  $t_R = 11.7$  min (minor),  $t_R = 12.6$  min (major).  $[\alpha]_D^{21} = 25.2$  (c 1.00,  $CHCl_3$ ).  $^1H$  NMR (400 MHz,  $CDCl_3$ )  $\delta$  7.93 – 7.77 (m, 5H), 7.43 – 7.39 (m, 1H), 7.33 (d,  $J = 9.0$  Hz, 1H), 7.29 – 7.25 (m, 1H), 7.21 – 7.13 (m, 3H), 6.96 (d,  $J = 8.6$  Hz, 1H), 5.83 (dd,  $J = 20.0, 14.6$  Hz, 1H), 5.65 (dd,  $J = 14.6, 4.0$  Hz, 1H), 5.37 (dd,  $J = 20.0, 4.0$  Hz, 1H), 3.83 – 3.74 (m, 2H), 0.91 - 0.83 (m, 2H), 0.25 – 0.17 (m, 2H), 0.08 – 0.13 (m, 1H), -0.17 (s, 3H), -0.20 (s, 3H).  $^{13}C$  NMR (101 MHz,  $CDCl_3$ )  $\delta$  154.5, 141.7, 138.8, 136.6, 135.4, 134.0, 133.2, 131.4, 130.7, 129.4, 128.9, 127.9, 127.7, 126.6, 126.5, 126.3, 126.1, 126.0, 125.8, 124.7, 123.6, 115.1, 72.6, 10.5, 2.8, 2.7, -2.1, -2.2. HRMS (ESI, m/z): calcd for  $C_{28}H_{28}NaOSi^+$   $[M + Na]^+$ : 431.1802, found 431.1804.

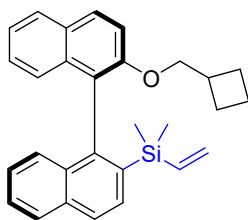

**3j**

**3j**, colorless oil. 42.26 mg, 99% yield, 96% ee, HPLC analysis on a Chiralcel OD-H column (hexane, flow rate 1.0 mL/min):  $t_R = 8.9$  min (minor),  $t_R = 9.7$  min (major).  $[\alpha]_D^{21} = 22.4$  (c 1.00,  $CHCl_3$ ).  $^1H$  NMR (400 MHz,  $CDCl_3$ )  $\delta$  7.94 (d,  $J = 9.0$  Hz, 1H), 7.86 (dd,  $J = 18.2, 8.6$  Hz, 3H), 7.77 (d,  $J = 8.4$  Hz, 1H), 7.43 – 7.39 (m, 1H), 7.34 – 7.26 (m, 2H), 7.19 – 7.15 (m, 3H), 7.02 (d,  $J = 8.4$  Hz, 1H), 5.81 (dd,  $J = 20.0, 14.6$  Hz, 1H), 5.65 (dd,  $J = 14.6, 4.0$  Hz, 1H), 5.35 (dd,  $J = 20.0, 4.0$  Hz, 1H), 3.91 - 3.87 (m, 1H), 3.81 – 3.77 (m, 1H), 2.38 – 2.35 (m, 1H), 1.67 – 1.32 (m, 6H), -0.18 (s, 3H), -0.21 (s, 3H).  $^{13}C$  NMR (101 MHz,  $CDCl_3$ )  $\delta$  154.7, 141.8, 138.8, 136.5, 135.3, 133.9, 133.2, 131.4, 130.7, 129.5, 128.9,

127.8, 127.7, 126.5, 126.4, 126.3, 126.1, 126.0, 125.7, 124.5, 123.5, 114.6, 72.1, 34.8, 24.1, 24.1, 18.2, -2.1, -2.2. HRMS (ESI, m/z): calcd for C<sub>29</sub>H<sub>30</sub>NaOSi<sup>+</sup> [M + Na]<sup>+</sup>: 445.1958, found 445.1962.

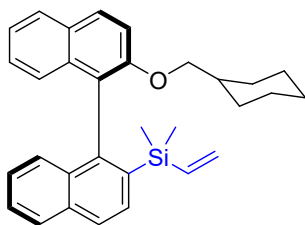

**3k**

**3k**, colorless oil. 45.07 mg, 99% yield, 97% ee, HPLC analysis on a Chiralcel OD-H column (hexane, flow rate 1.0 mL/min):  $t_R = 7.5$  min (minor),  $t_R = 8.2$  min (major).  $[\alpha]_D^{21} = 21.4$  (c 1.00, CHCl<sub>3</sub>). <sup>1</sup>H NMR (400 MHz, CDCl<sub>3</sub>)  $\delta$  7.93 – 7.76 (m, 5H), 7.42 – 7.38 (m, 1H), 7.32 – 7.25 (m, 2H), 7.19 – 7.13 (m, 3H), 7.01 (d,  $J = 8.6$  Hz, 1H), 5.81 (dd,  $J = 20.0, 14.6$  Hz, 1H), 5.64 (dd,  $J = 14.6, 4.0$  Hz, 1H), 5.35 (dd,  $J = 20.0, 4.0$  Hz, 1H), 3.74 – 3.63 (m, 2H), 1.43 – 1.41 (m, 1H), 1.36 – 1.22 (m, 4H), 0.99 – 0.85 (m, 4H), 0.61 – 0.53 (m, 2H), -0.18 (s, 3H), -0.21 (s, 3H). <sup>13</sup>C NMR (101 MHz, CDCl<sub>3</sub>)  $\delta$  154.8, 141.7, 138.8, 136.5, 135.2, 133.9, 133.2, 131.4, 130.7, 129.4, 128.8, 127.8, 127.7, 126.6, 126.4, 126.2, 126.1, 125.7, 124.5, 123.5, 114.8, 74.4, 37.7, 29.6, 29.4, 26.5, 25.7, 25.7, -2.1, -2.1. HRMS (ESI, m/z): calcd for C<sub>31</sub>H<sub>34</sub>NaOSi<sup>+</sup> [M + Na]<sup>+</sup>: 473.2271, found 473.2276.

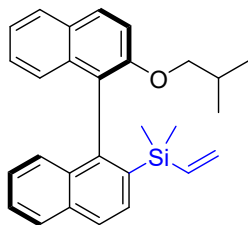

**3l**

**3l**, colorless oil. 41.06 mg, 99% yield, 94% ee, HPLC analysis on a Chiralcel OD-H column (hexane, flow rate 1.0 mL/min):  $t_R = 8.2$  min (minor),  $t_R = 8.9$  min (major).  $[\alpha]_D^{21} = 20.0$  (c 1.00, CHCl<sub>3</sub>). <sup>1</sup>H NMR (400 MHz, CDCl<sub>3</sub>)  $\delta$  7.94 (d,  $J = 9.0$  Hz, 1H), 7.89 – 7.82 (m, 3H), 7.77 (d,  $J = 8.2$  Hz, 1H), 7.43 – 7.39 (m, 1H), 7.33 – 7.26 (m, 2H), 7.20 – 7.14 (m, 3H), 7.01 (d,  $J = 8.4$  Hz, 1H), 5.80 (dd,  $J = 20.0, 14.6$  Hz, 1H), 5.64 (dd,  $J = 14.6, 4.0$  Hz, 1H), 5.35 (dd,  $J = 20.0, 4.0$  Hz, 1H), 3.73 – 3.59 (m, 2H), 1.67 – 1.61 (m, 1H), 0.53 – 0.49 (m, 6H), -0.19 (s, 3H), -0.21 (s, 3H). <sup>13</sup>C NMR (101 MHz, CDCl<sub>3</sub>)  $\delta$  154.7, 141.8, 138.8, 136.5, 135.2, 133.9, 133.2, 131.3, 130.7, 129.5, 128.8, 127.8, 127.7, 126.5, 126.4, 126.2,

126.1, 126.0, 125.7, 124.4, 123.5, 114.5, 75.1, 28.4, 19.0, 18.9, -2.1, -2.2. HRMS (ESI, m/z): calcd for  $C_{28}H_{30}NaOSi^+$   $[M + Na]^+$ : 433.1958, found 433.1964.

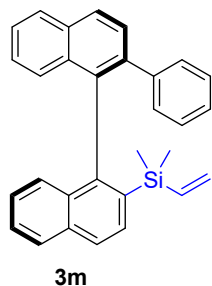

**3m**, colorless oil. 41.46 mg, 99% yield, 98% ee, HPLC analysis on a Chiralcel OD-H column (hexane, flow rate 1.0 mL/min):  $t_R = 16.0$  min (minor),  $t_R = 17.9$  min (major).  $[\alpha]_D^{21} = 61.9$  (c 1.00,  $CHCl_3$ ).  $^1H$  NMR (600 MHz,  $CDCl_3$ )  $\delta$  8.01 (d,  $J = 8.6$  Hz, 1H), 7.91 (d,  $J = 8.2$  Hz, 1H), 7.81 – 7.79 (m, 2H), 7.64 (d,  $J = 8.6$  Hz, 1H), 7.59 (d,  $J = 8.4$  Hz, 1H), 7.44 – 7.37 (m, 2H), 7.26 – 7.18 (m, 3H), 7.14 (d,  $J = 8.4$  Hz, 1H), 7.05 – 7.03 (m, 2H), 7.01 – 6.96 (m, 3H), 5.64 – 5.59 (m, 2H), 5.30 – 5.24 (m, 1H), -0.30 (s, 3H), -0.34 (s, 3H).  $^{13}C$  NMR (101 MHz,  $CDCl_3$ )  $\delta$  143.2, 141.6, 138.9, 138.3, 136.9, 136.8, 134.5, 134.0, 133.3, 132.7, 131.4, 131.0, 129.6, 128.5, 128.3, 128.0, 127.9, 127.5, 127.2, 126.6, 126.5, 126.4, 126.2, 125.8, -2.1, -2.2. HRMS (ESI, m/z): calcd for  $C_{30}H_{26}NaSi^+$   $[M + Na]^+$ : 437.1696, found 437.1703.

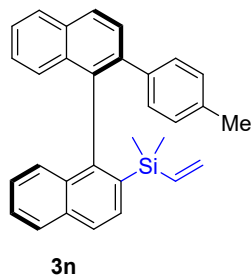

**3n**, colorless oil. 42.86 mg, 99% yield, 99% ee, HPLC analysis on a Chiralcel MD-H column (hexane/isopropanol = 99/1, flow rate 1.0 mL/min):  $t_R = 3.8$  min (minor),  $t_R = 4.2$  min (major).  $[\alpha]_D^{23} = 57.6$  (c 1.00,  $CHCl_3$ ).  $^1H$  NMR (400 MHz,  $CDCl_3$ )  $\delta$  7.99 (d,  $J = 8.4$  Hz, 1H), 7.90 (d,  $J = 8.2$  Hz, 1H), 7.80 (d,  $J = 8.4$  Hz, 2H), 7.62 (t,  $J = 8.8$  Hz, 2H), 7.43 – 7.36 (m, 2H), 7.27 – 7.17 (m, 3H), 7.11 (d,  $J = 8.4$  Hz, 1H), 6.94 (d,  $J = 8.2$  Hz, 2H), 6.79 (d,  $J = 8.0$  Hz, 2H), 5.68 – 5.58 (m, 2H), 5.32 – 5.24 (m, 1H), 2.14 (s, 3H), -0.30 (s, 3H), -0.34 (s, 3H).  $^{13}C$  NMR (101 MHz,  $CDCl_3$ )  $\delta$  143.4, 138.9, 138.6, 138.3, 136.9, 136.6, 136.1, 134.5, 133.9, 133.3, 132.5, 131.4, 131.0, 129.4, 128.6, 128.3, 128.2, 127.9, 127.8,

127.5, 127.2, 126.5, 126.3, 126.2, 125.7, 21.1, -2.1, -2.2. HRMS (ESI, m/z): calcd for  $C_{31}H_{28}NaSi^+$  [M + Na]<sup>+</sup>: 451.1852, found 451.1857.

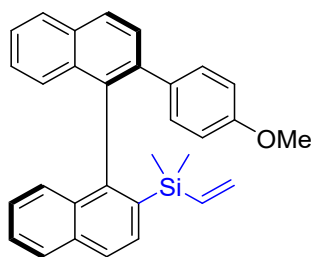

**3o**

**3o**, colorless oil. 44.40 mg, 99% yield, 99% ee, HPLC analysis on a Chiralcel MD-H column (hexane/isopropanol = 99.5/0.5, flow rate 1.0 mL/min):  $t_R = 5.5$  min (minor),  $t_R = 5.8$  min (major).  $[\alpha]_D^{23} = 63.1$  (c 1.00,  $CHCl_3$ ). <sup>1</sup>H NMR (400 MHz,  $CDCl_3$ )  $\delta$  7.98 (d,  $J = 8.4$  Hz, 1H), 7.90 (d,  $J = 8.2$  Hz, 1H), 7.82 – 7.80 (m, 2H), 7.63 – 7.60 (m, 2H), 7.43 – 7.37 (m, 2H), 7.27 – 7.19 (m, 3H), 7.10 (d,  $J = 8.4$  Hz, 1H), 6.97 (d,  $J = 8.6$  Hz, 2H), 6.52 (d,  $J = 8.6$  Hz, 2H), 5.67 – 5.60 (m, 2H), 5.32 – 5.25 (m, 1H), 3.62 (s, 3H), -0.30 (s, 3H), -0.34 (s, 3H). <sup>13</sup>C NMR (101 MHz,  $CDCl_3$ )  $\delta$  158.3, 143.5, 138.6, 138.4, 136.9, 136.5, 134.6, 134.1, 134.0, 133.4, 132.5, 131.5, 131.0, 130.6, 128.6, 128.2, 128.0, 127.8, 127.4, 127.2, 126.6, 126.3, 126.2, 126.2, 125.6, 113.1, 55.2, -2.1, -2.2. HRMS (ESI, m/z): calcd for  $C_{31}H_{32}NOSi^+$  [M +  $NH_4$ ]<sup>+</sup>: 462.2248, found 462.2250.

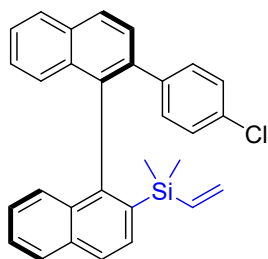

**3p**

**3p**, colorless oil. 44.00 mg, 98% yield, 99% ee, HPLC analysis on a Chiralcel MD-H column (hexane/isopropanol = 99/1, flow rate 1.0 mL/min):  $t_R = 3.9$  min (minor),  $t_R = 4.3$  min (major).  $[\alpha]_D^{24} = 64.0$  (c 1.00,  $CHCl_3$ ). <sup>1</sup>H NMR (400 MHz,  $CDCl_3$ )  $\delta$  8.01 (d,  $J = 8.6$  Hz, 1H), 7.92 (d,  $J = 8.2$  Hz, 1H), 7.82 (d,  $J = 8.4$  Hz, 2H), 7.62 – 7.57 (m 2H), 7.47 – 7.38 (m, 2H), 7.24 – 7.19 (m, 3H), 7.13 (d,  $J = 8.6$  Hz, 1H), 6.99 – 6.93 (m, 4H), 5.62 – 5.53 (m, 2H), 5.30 – 5.26 (m, 1H), -0.27 (s, 3H), -0.34 (s, 3H). <sup>13</sup>C NMR (101 MHz,  $CDCl_3$ )  $\delta$  142.8, 140.1, 138.0, 137.7, 137.0, 134.4, 133.8, 133.3, 132.7, 132.6, 131.4,

131.2, 130.8, 128.5, 128.1, 128.0, 127.9, 127.7, 127.5, 127.0, 126.8, 126.5, 126.4, 126.3, 126.1, -2.1, -2.2. HRMS (ESI, m/z): calcd for C<sub>30</sub>H<sub>25</sub>ClKSi<sup>+</sup> [M + K]<sup>+</sup>: 487.1046, found 487.1047.

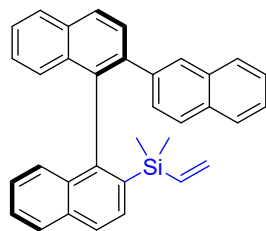

**3q**

**3q**, colorless oil. 46.46 mg, 99% yield, 99% ee, HPLC analysis on a Chiralcel MD-H column (hexane/isopropanol = 99/1, flow rate 1.0 mL/min):  $t_R = 4.4$  min (minor),  $t_R = 5.1$  min (major).  $[\alpha]_D^{24} = 82.3$  (c 1.00, CHCl<sub>3</sub>). <sup>1</sup>H NMR (600 MHz, CDCl<sub>3</sub>)  $\delta$  8.05 (d,  $J = 8.6$  Hz, 1H), 7.95 (d,  $J = 8.2$  Hz, 1H), 7.81 – 7.71 (m, 3H), 7.61 (d,  $J = 7.6$  Hz, 1H), 7.58 – 7.53 (m, 2H), 7.48 – 7.41 (m, 3H), 7.39 (t,  $J = 7.4$  Hz, 1H), 7.35 – 7.29 (m, 3H), 7.26 – 7.22 (m, 2H), 7.20 – 7.16 (m, 2H), 5.68 – 5.52 (m, 2H), 5.26 (dd,  $J = 19.4, 4.4$  Hz, 1H), -0.27 (s, 3H), -0.34 (s, 3H). <sup>13</sup>C NMR (101 MHz, CDCl<sub>3</sub>)  $\delta$  143.1, 139.1, 138.9, 138.2, 137.1, 137.0, 134.5, 133.9, 133.4, 132.9, 132.7, 131.9, 131.4, 131.1, 128.8, 128.7, 128.3, 128.1, 128.0, 127.9, 127.7, 127.5, 127.4, 127.2, 126.9, 126.7, 126.4, 126.3, 126.2, 125.9, 125.8, 125.7, -2.0, -2.1. HRMS (ESI, m/z): calcd for C<sub>34</sub>H<sub>28</sub>NaSi<sup>+</sup> [M + Na]<sup>+</sup>: 487.1852, found 487.1859.

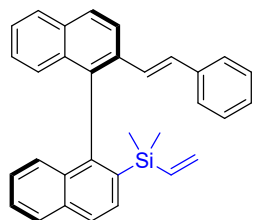

**3r**

**3r**, colorless oil. 44.00 mg, 99% yield, 97% ee, HPLC analysis on a Chiralcel MD-H column (hexane/isopropanol = 99/1, flow rate 1.0 mL/min):  $t_R = 4.3$  min (minor),  $t_R = 5.0$  min (major).  $[\alpha]_D^{15} = 43.5$  (c 1.00, CHCl<sub>3</sub>). <sup>1</sup>H NMR (400 MHz, CDCl<sub>3</sub>)  $\delta$  7.97 (q,  $J = 8.8$  Hz, 3H), 7.92 – 7.87 (m, 1H), 7.86 – 7.82 (m, 1H), 7.45 – 7.36 (m, 2H), 7.20 – 7.09 (m, 10H), 7.01 (d,  $J = 8.4$  Hz, 1H), 6.66 (d,  $J = 16.4$  Hz, 1H), 5.77 (dd,  $J = 20.0, 14.6$  Hz, 1H), 5.62 (dd,  $J = 14.6, 3.8$  Hz, 1H), 5.35 (dd,  $J = 20.0, 3.8$  Hz, 1H), -0.21 (s, 3H), -0.23 (s, 3H). <sup>13</sup>C NMR (101 MHz, CDCl<sub>3</sub>)  $\delta$  143.1, 138.2, 137.6, 137.6, 137.1, 134.7,

134.2, 133.8, 133.1, 132.9, 131.4, 131.1, 129.4, 128.6, 128.4, 127.9, 127.8, 127.7, 127.5, 127.0, 126.8, 126.6, 126.5, 126.4, 126.3, 125.9, 122.5, -2.2. HRMS (ESI, m/z): calcd for  $C_{32}H_{28}NaSi^+$   $[M + Na]^+$ : 463.1852, found 463.1860.

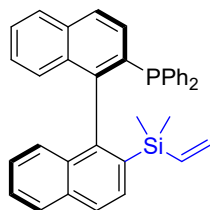

**3s**

**3s**, colorless oil. 23.30 mg, 45% yield, 99% ee, HPLC analysis on a Chiralcel AD-H column (hexane/isopropanol = 99.5/0.5, flow rate 1.0 mL/min):  $t_R = 5.0$  min (major),  $t_R = 6.9$  min (minor).  $[\alpha]_D^{25} = 6.4$  (c 1.00,  $CHCl_3$ ).  $^1H$  NMR (600 MHz,  $CDCl_3$ )  $\delta$  7.92 (d,  $J = 8.2$  Hz, 1H), 7.90 – 7.87 (m, 2H), 7.80 – 7.77 (m, 2H), 7.51 (dd,  $J = 8.6, 2.8$  Hz, 1H), 7.47 -7.44 (m, 1H), 7.30 – 7.26 (m, 5H), 7.24 – 7.19 (m, 3H), 7.14 – 7.12 (m, 1H), 7.05 – 7.03 (m, 2H), 6.95 – 6.92 (m, 2H), 6.74 – 6.71 (m, 1H), 6.65 (d,  $J = 8.4$  Hz, 1H), 5.73 (dd,  $J = 20.0, 14.6$  Hz, 1H), 5.63 (dd,  $J = 14.6, 4.0$  Hz, 1H), 5.37 (dd,  $J = 20.0, 4.0$  Hz, 1H), -0.26 (s, 3H), -0.28 (s, 3H).  $^{13}C$  NMR (151 MHz,  $CDCl_3$ )  $\delta$  146.7 (d,  $J = 33.8$  Hz), 143.8 (d,  $J = 8.5$  Hz), 138.5, 138.1 (d,  $J = 14.3$  Hz), 137.5 (d,  $J = 13.1$  Hz), 136.5 (d,  $J = 2.3$  Hz), 136.0 (d,  $J = 12.7$  Hz), 134.4 (d,  $J = 6.7$  Hz), 134.2, 134.1, 133.8, 133.7, 133.5, 133.4, 133.2 (d,  $J = 3.0$  Hz), 131.2, 131.1, 130.1 (d,  $J = 1.5$  Hz), 128.5, 128.4, 128.4, 128.3, 128.1, 128.0, 127.9, 127.8, 127.6 (d,  $J = 2.7$ ), 127.6, 127.2, 127.0, 126.8, 126.4, 126.0, 125.4, -1.9, -2.0.  $^{31}P$  NMR (243 MHz,  $CDCl_3$ )  $\delta$  -15.83 (s). HRMS (ESI, m/z): calcd for  $C_{36}H_{32}PSi^+$   $[M + H]^+$ : 523.2005, found 523.2004.

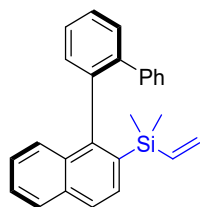

**3t**

**3t**, colorless oil. 36.40 mg, 99% yield, 69% ee, HPLC analysis on a Chiralcel OD-H column (hexane/isopropanol = 99.5/0.5, flow rate 1.0 mL/min):  $t_R = 4.8$  min (minor),  $t_R = 5.9$  min (major).  $[\alpha]_D^{26} = 16.7$  (c 1.00,  $CHCl_3$ ).  $^1H$  NMR (400 MHz,  $CDCl_3$ )  $\delta$  7.75 (d,  $J = 8.0$  Hz, 2H), 7.61 (d,  $J = 8.4$  Hz,

1H), 7.55 – 7.52 (m, 2H), 7.44 – 7.32 (m, 4H), 7.27 – 7.23 (m, 1H), 7.06 – 7.03 (m, 2H), 6.99 – 6.95 (m, 3H), 5.95 (dd,  $J = 19.8, 14.6$  Hz, 1H), 5.82 (dd,  $J = 14.6, 4.0$  Hz, 1H), 5.53 (dd,  $J = 19.8, 4.0$  Hz, 1H), -0.00 (s, 3H), -0.01 (s, 3H).  $^{13}\text{C}$  NMR (101 MHz,  $\text{CDCl}_3$ )  $\delta$  146.1, 141.8, 141.1, 140.0, 138.9, 135.3, 133.4, 132.7, 132.3, 131.5, 131.1, 130.1, 129.2, 128.3, 127.8, 127.6, 127.0, 126.9, 126.5, 126.4, 126.1, 125.8, -1.6, -2.0. HRMS (ESI,  $m/z$ ): calcd for  $\text{C}_{26}\text{H}_{25}\text{Si}^+$  [ $\text{M} + \text{H}$ ] $^+$ : 365.1720, found 365.1719.

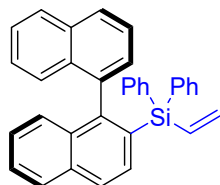

**3v**

**3v**, white solid, m.p. 71 - 72 °C. 43.00 mg, 93% yield, 96% ee, HPLC analysis on a Chiralcel MD-H column (hexane, flow rate 1.0 mL/min):  $t_{\text{R}} = 12.4$  min (minor),  $t_{\text{R}} = 19.7$  min (major).  $[\alpha]_{\text{D}}^{17} = 6.0$  (c 0.50,  $\text{CHCl}_3$ ).  $^1\text{H}$  NMR (400 MHz,  $\text{CDCl}_3$ )  $\delta$  7.89 (t,  $J = 7.4$  Hz, 2H), 7.76 (d,  $J = 8.2$  Hz, 2H), 7.69 (d,  $J = 8.4$  Hz, 1H), 7.47 – 7.43 (m, 1H), 7.35 – 7.32 (m, 1H), 7.27 – 7.12 (m, 16H), 5.50 (dd,  $J = 13.0, 5.0$  Hz, 1H), 5.27 – 5.11 (m, 2H).  $^{13}\text{C}$  NMR (101 MHz,  $\text{CDCl}_3$ )  $\delta$  146.8, 138.9, 136.0, 135.7, 135.0, 134.9, 134.0, 133.9, 133.4, 133.3, 133.2, 133.1, 132.9, 129.2, 129.1, 128.7, 128.2, 128.0, 127.6, 127.5, 127.3, 127.0, 126.7, 126.8, 126.1, 125.9, 125.6, 125.1. HRMS (ESI,  $m/z$ ): calcd for  $\text{C}_{34}\text{H}_{27}\text{Si}^+$  [ $\text{M} + \text{H}$ ] $^+$ : 463.1877, found 463.1863.

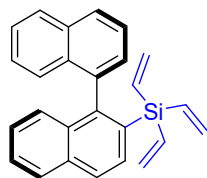

**3w**

**3w**, colorless oil. 34.50 mg, 95% yield, 98% ee, HPLC analysis on a Chiralcel MD-H column (hexane, flow rate 1.0 mL/min):  $t_{\text{R}} = 7.8$  min (minor),  $t_{\text{R}} = 12.6$  min (major).  $[\alpha]_{\text{D}}^{17} = -8.4$  (c 1.00,  $\text{CHCl}_3$ ).  $^1\text{H}$  NMR (400 MHz,  $\text{CDCl}_3$ )  $\delta$  7.93 – 7.87 (m, 4H), 7.80 (d,  $J = 8.4$  Hz, 1H), 7.49 – 7.35 (m, 4H), 7.23 – 7.19 (m, 3H), 7.14 (d,  $J = 8.4$  Hz, 1H), 5.78 – 5.72 (m, 4H), 5.68 – 5.63 (m, 2H), 5.44 (dd,  $J = 19.6, 4.6$  Hz, 3H).  $^{13}\text{C}$  NMR (101 MHz,  $\text{CDCl}_3$ )  $\delta$  146.1, 139.3, 134.3, 134.2, 134.1, 133.9, 133.5, 133.3, 133.2,



132.0, 129.0, 128.2, 128.0, 127.9, 127.2, 127.1, 126.8, 126.6, 126.1, 126.0, 125.8, 125.0. HRMS (ESI, m/z): calcd for  $C_{26}H_{22}NaSi^+$   $[M + Na]^+$ : 363.1383, found 363.1385.

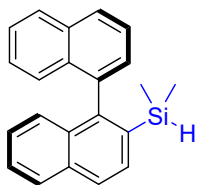

**3x**

**3x**, colorless oil. 31.24 mg, 99% yield, 96% ee, HPLC analysis on a Chiralcel OD-H column (hexane/isopropanol = 99.5/0.5, flow rate 1.0 mL/min):  $t_R = 4.9$  min (minor),  $t_R = 5.5$  min (major).  $[\alpha]_D^{26} = -35.6$  (c 1.00,  $CHCl_3$ ).  $^1H$  NMR (400 MHz,  $CDCl_3$ )  $\delta$  8.06 - 7.98 (m, 4H), 7.87 (d,  $J = 8.2$  Hz, 1H), 7.69 - 7.65 (m, 1H), 7.54 - 7.51 (m, 3H), 7.36 - 7.26 (m, 4H), 4.06 - 4.02 (m, 1H), -0.01 (d,  $J = 3.8$  Hz, 3H), -0.03 (d,  $J = 3.8$  Hz, 3H).  $^{13}C$  NMR (101 MHz,  $CDCl_3$ )  $\delta$  145.6, 138.7, 135.3, 133.9, 133.7, 133.5, 133.0, 131.0, 128.6, 128.2, 128.1, 128.0, 127.0, 127.0, 126.9, 126.4, 126.1, 126.0, 125.2, -2.9, -3.0. HRMS (ESI, m/z): calcd for  $C_{22}H_{21}Si^+$   $[M + H]^+$ : 313.1407, found 313.1431.

### 3. Synthetic Application

#### 3.1. Scale-up reaction.

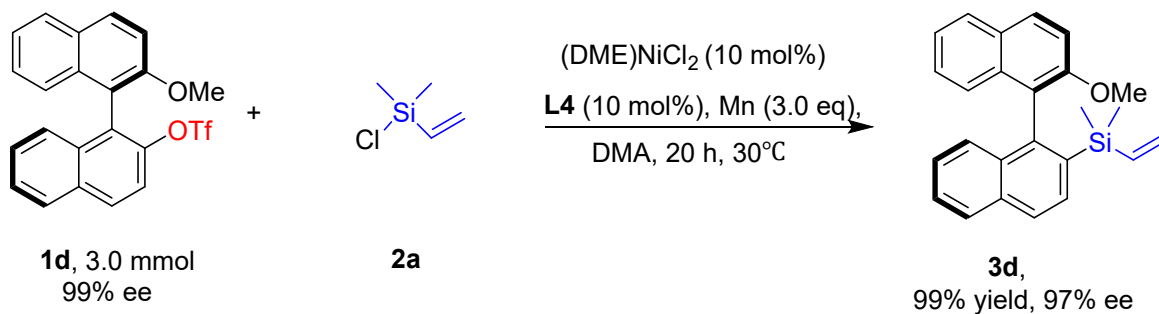

This procedure was conducted in an argon-filled glove box. (DME)NiCl<sub>2</sub> (65.92 mg, 0.3 mmol), **L4** (99.72 mg, 0.3 mmol) and Mn (494.5 mg, 9.0 mmol) in DMA (30 mL) were charged sequentially into a 100 mL pressure tube under argon. The mixture was stirred for 30 min at room temperature. Then **1d** (1.298 g, 3.0 mmol, 1.0 equiv.) and **2a** (1.086 g, 9.0 mmol) were added to the reaction mixture. The reaction tube was sealed and stirred at 30 °C. After the reaction was completed (20 h), the reaction mixture was filtered through a pad of celite, eluted with ethyl acetate, concentrated, and purified by silica gel chromatography (PE:EA = 20:1) to give the indicated product **3d** (1.103 g, 99% yield, 97% ee). HPLC analysis on a Chiralcel OD-H column (hexane, flow rate 1.0 mL/min):  $t_R = 13.3$  min (minor),  $t_R = 14.4$  min (major). <sup>1</sup>H NMR (600 MHz, CDCl<sub>3</sub>)  $\delta$  7.98 (d,  $J = 9.0$  Hz, 1H), 7.90 (dd,  $J = 19.2, 8.2$  Hz, 2H), 7.84 (d,  $J = 8.2$  Hz, 1H), 7.80 (d,  $J = 8.4$  Hz, 1H), 7.44 – 7.41 (m, 1H), 7.38 (d,  $J = 9.0$  Hz, 1H), 7.30 – 7.27 (m, 1H), 7.22 – 7.14 (m, 3H), 6.92 (d,  $J = 8.6$  Hz, 1H), 5.79 (dd,  $J = 20.2, 14.6$  Hz, 1H), 5.65 (dd,  $J = 14.6, 3.8$  Hz, 1H), 5.35 (dd,  $J = 20.2, 3.8$  Hz, 1H), 3.74 (s, 3H), -0.19 (s, 3H), -0.20 (s, 3H).

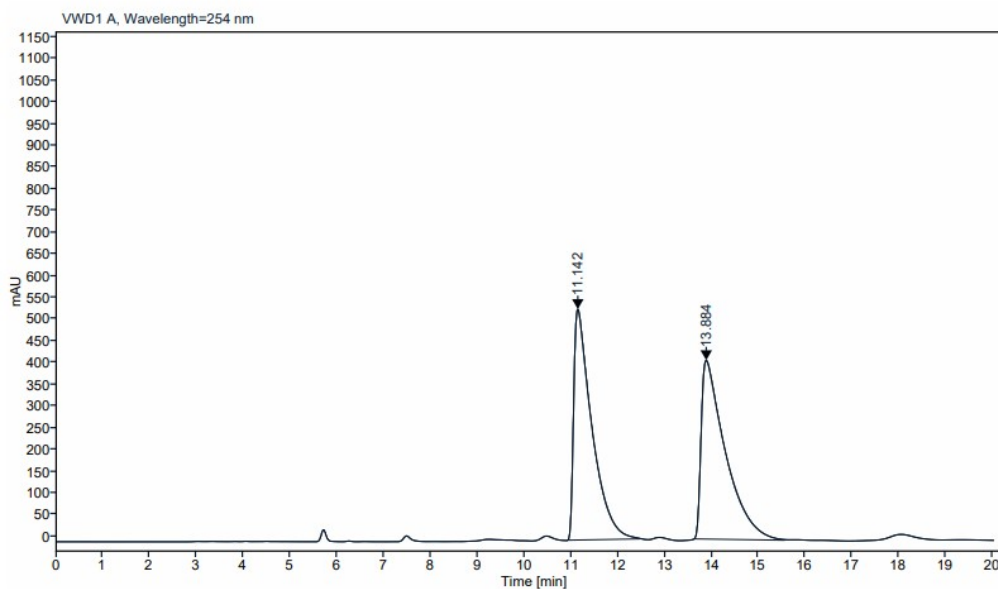

### Results

| No. | RT[min] | Area       | Height   | Relative Height % | Relative Area % |
|-----|---------|------------|----------|-------------------|-----------------|
|     | 11.142  | 14303.3682 | 531.2927 | 56.36             | 49.23           |
|     | 13.884  | 14751.6621 | 411.3700 | 43.64             | 50.77           |
| SUM | 25.026  | 29055.0303 | 942.6627 | 100.00            | 100.00          |

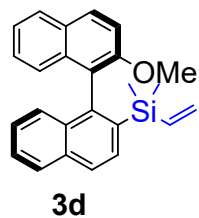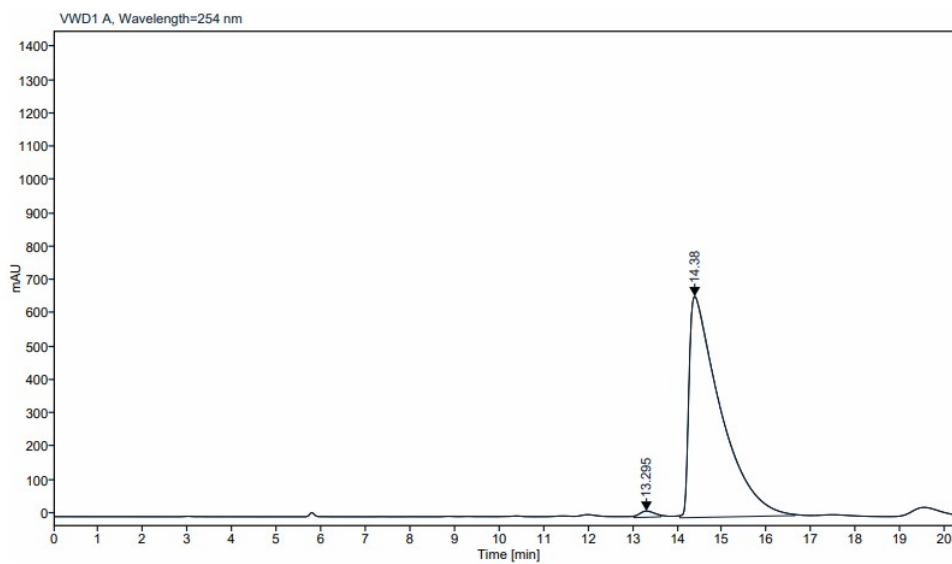

### Results

| No. | RT[min] | Area       | Height   | Relative Height % | Relative Area % |
|-----|---------|------------|----------|-------------------|-----------------|
|     | 13.295  | 441.2271   | 18.7074  | 2.74              | 1.34            |
|     | 14.380  | 32398.0703 | 663.6711 | 97.26             | 98.66           |
| SUM | 27.675  | 32839.2975 | 682.3785 | 100.00            | 100.00          |

### 3.2. Derivatization Reactions.

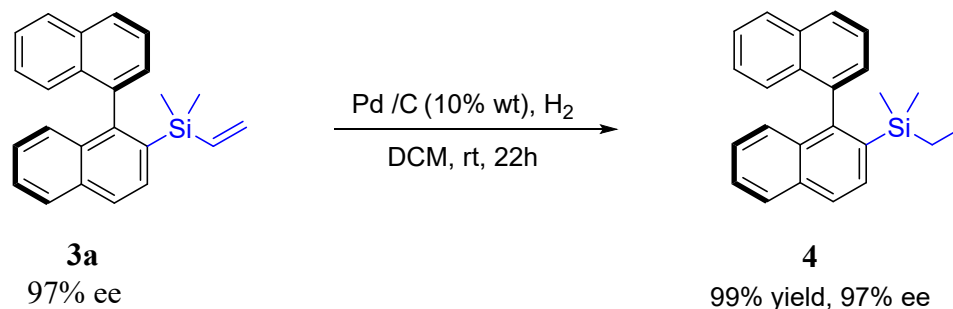

**3a** (67.71 mg, 0.2 mmol) and DCM (4.0 mL) were added to a flame dried schlenk tube under hydrogen, the Pd/C (21.20 mg, 10% wt) was added and stirred at room temperature. After stirred for 22 h, the reaction mixture was filtered through a pad of celite eluting with ethyl acetate. The crude mixture was concentrated and purified by silica gel chromatography (PE) to give the product **4** (68.10 mg, 99% yield, 97% ee). HPLC analysis on a Chiralcel MD-H column (hexane, flow rate 1.0 mL/min):  $t_R = 7.5$  min (minor),  $t_R = 12.6$  min (major).  $[\alpha]_D^{20} = -24.6$  (c 1.00, CHCl<sub>3</sub>). <sup>1</sup>H NMR (400 MHz, CDCl<sub>3</sub>)  $\delta$  7.94 – 7.85 (m, 4H), 7.76 (d,  $J = 8.4$  Hz, 1H), 7.54 (dd,  $J = 8.2, 7.0$  Hz, 1H), 7.43 – 7.38 (m, 3H), 7.23 – 7.13 (m, 4H), 0.74 (t,  $J = 7.8$  Hz, 3H), 0.41 – 0.29 (m, 2H), -0.24 (s, 3H), -0.36 (s, 3H). <sup>13</sup>C NMR (101 MHz, CDCl<sub>3</sub>)  $\delta$  145.2, 139.3, 136.7, 134.1, 133.6, 133.4, 133.3, 131.1, 128.6, 128.2, 128.1, 127.8, 127.1, 127.0, 126.8, 126.2, 126.0, 126.0, 125.9, 125.2, 8.3, 7.7, -2.2, -2.3. HRMS (ESI, m/z): calcd for C<sub>24</sub>H<sub>25</sub>Si<sup>+</sup> [M + H]<sup>+</sup>: 341.1720, found 341.1734.

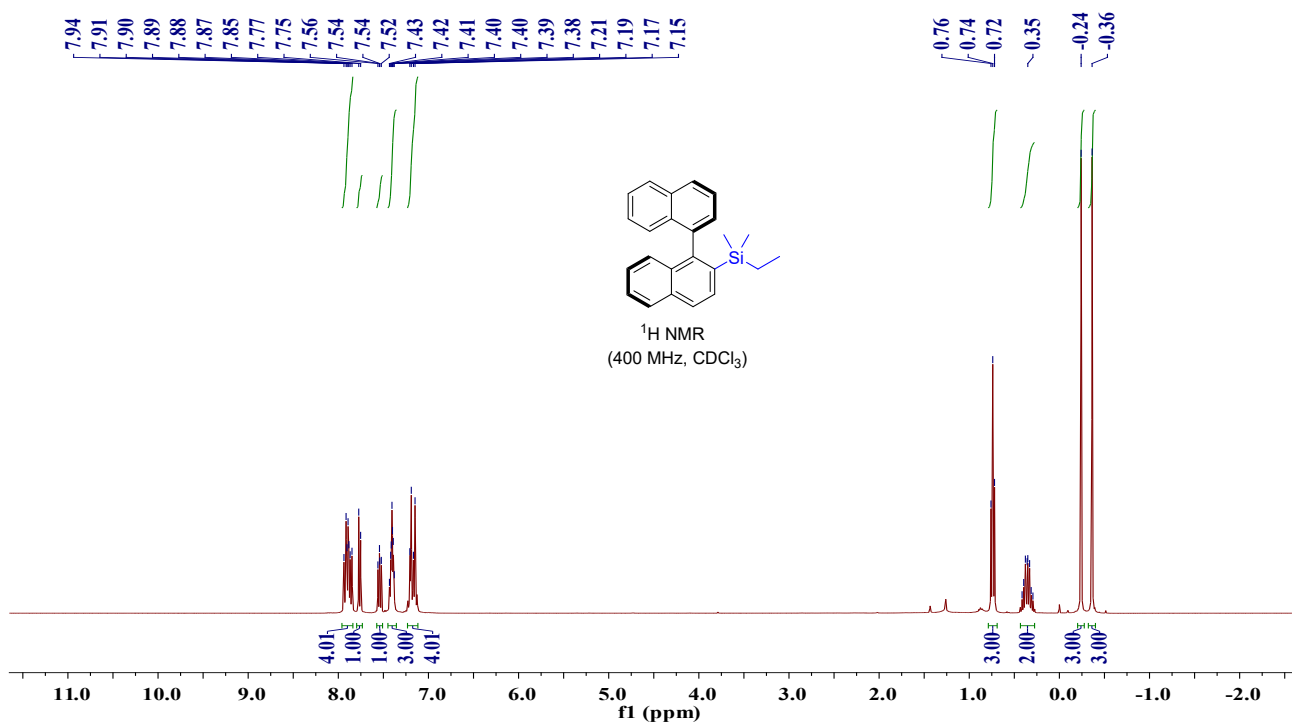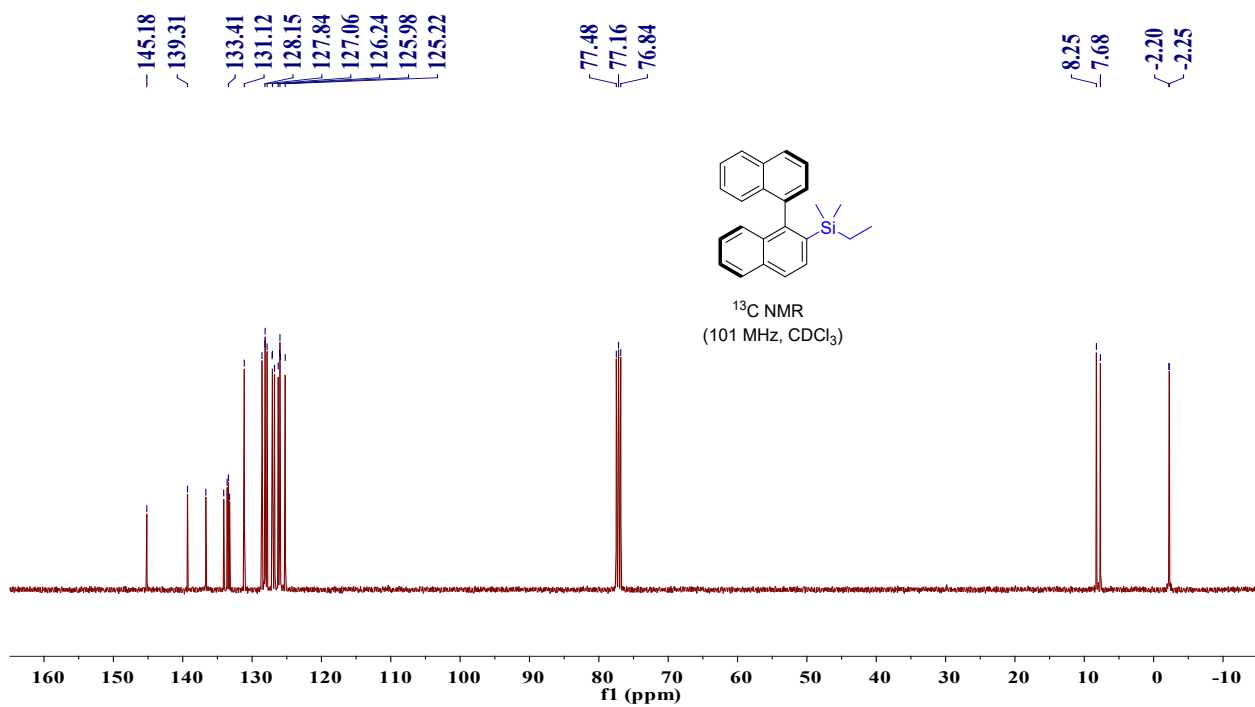

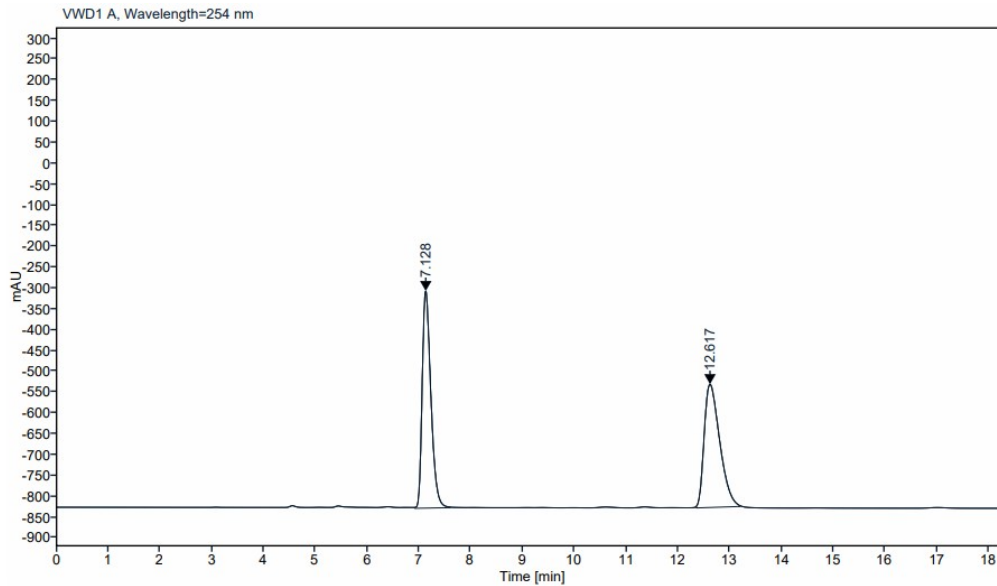

**Results**

| No. | RT[min] | Area       | Height   | Relative Height % | Relative Area % |
|-----|---------|------------|----------|-------------------|-----------------|
|     | 7.128   | 6071.3252  | 521.4600 | 63.77             | 49.59           |
|     | 12.617  | 6170.6973  | 296.1962 | 36.23             | 50.41           |
| SUM | 19.745  | 12242.0225 | 817.6562 | 100.00            | 100.00          |

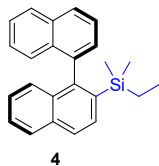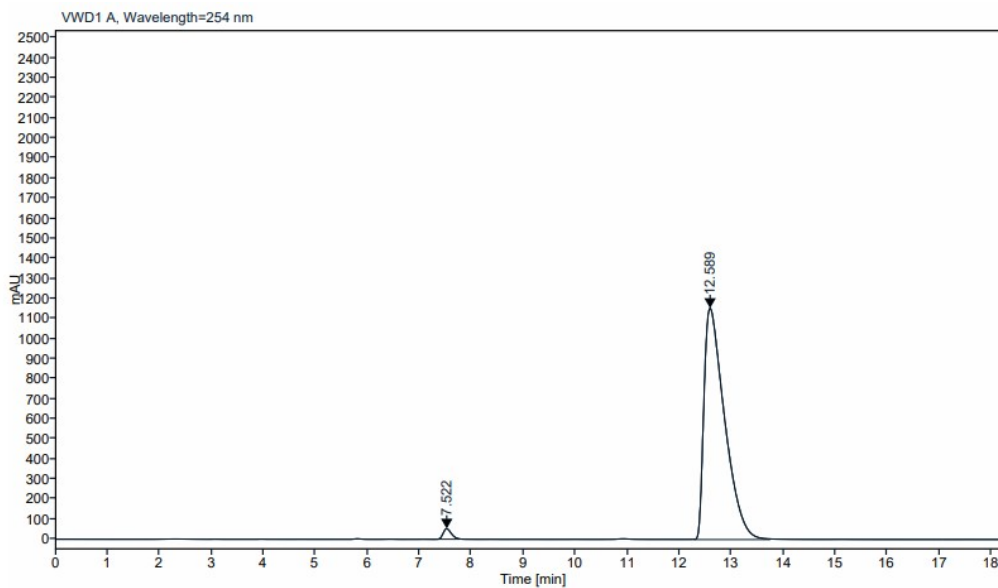

**Results**

| No. | RT[min] | Area       | Height    | Relative Height % | Relative Area % |
|-----|---------|------------|-----------|-------------------|-----------------|
|     | 7.522   | 572.5878   | 52.1798   | 4.33              | 1.77            |
|     | 12.589  | 31811.5664 | 1154.1949 | 95.67             | 98.23           |
| SUM | 20.111  | 32384.1542 | 1206.3747 | 100.00            | 100.00          |

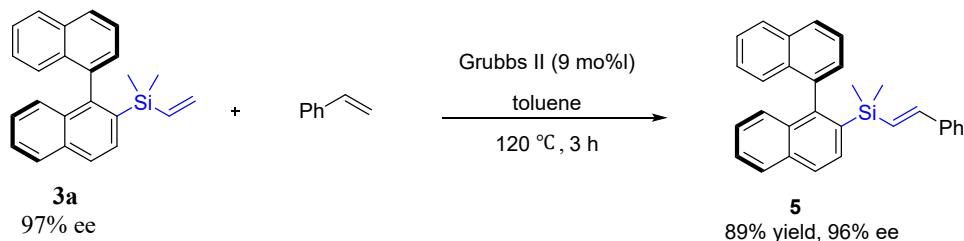

**3a** (33.86 mg, 0.1 mmol, 1.0 equiv), styrene (104.15 mg, 1.0 mmol, 10.0 equiv), Grubbs II (7.64 mg, 0.9 mol%) and toluene (0.5 mL) were added to a flame dried schlenk tube under argon, then stirred at 120°C. After stirred for 3 h, the reaction mixture was filtered through a pad of celite eluting with ethyl acetate. The crude mixture was concentrated and purified by silica gel chromatography (PE) to give the product **5** (36.80 mg, 89% yield, 96% ee). HPLC analysis on a Chiralcel MD-H column (hexane, flow rate 1.0 mL/min):  $t_R = 15.1$  min (minor),  $t_R = 27.9$  min (major).  $[\alpha]_D^{21} = 8.4$  (c 1.00, CHCl<sub>3</sub>). <sup>1</sup>H NMR (400 MHz, CDCl<sub>3</sub>)  $\delta$  7.94 – 7.81 (m, 5H), 7.54 – 7.50 (m, 1H), 7.43 – 7.35 (m, 3H), 7.24 – 7.16 (m, 7H), 7.09 – 7.07 (m, 2H), 6.50 (d,  $J = 19.1$  Hz, 1H), 5.93 (d,  $J = 19.1$  Hz, 1H), -0.00 (s, 3H), -0.03 (s, 3H). <sup>13</sup>C NMR (101 MHz, CDCl<sub>3</sub>)  $\delta$  145.4, 143.6, 139.1, 138.2, 136.2, 134.1, 133.7, 133.5, 133.2, 131.2, 128.9, 128.4, 128.4, 128.2, 128.0, 127.9, 127.1, 127.0, 126.9, 126.5, 126.4, 126.1, 126.0, 125.8, 125.1, -1.1, -1.6. HRMS (ESI, m/z): calcd for C<sub>30</sub>H<sub>26</sub>NaSi<sup>+</sup> [M + Na]<sup>+</sup>: 437.1696, found 437.1705.

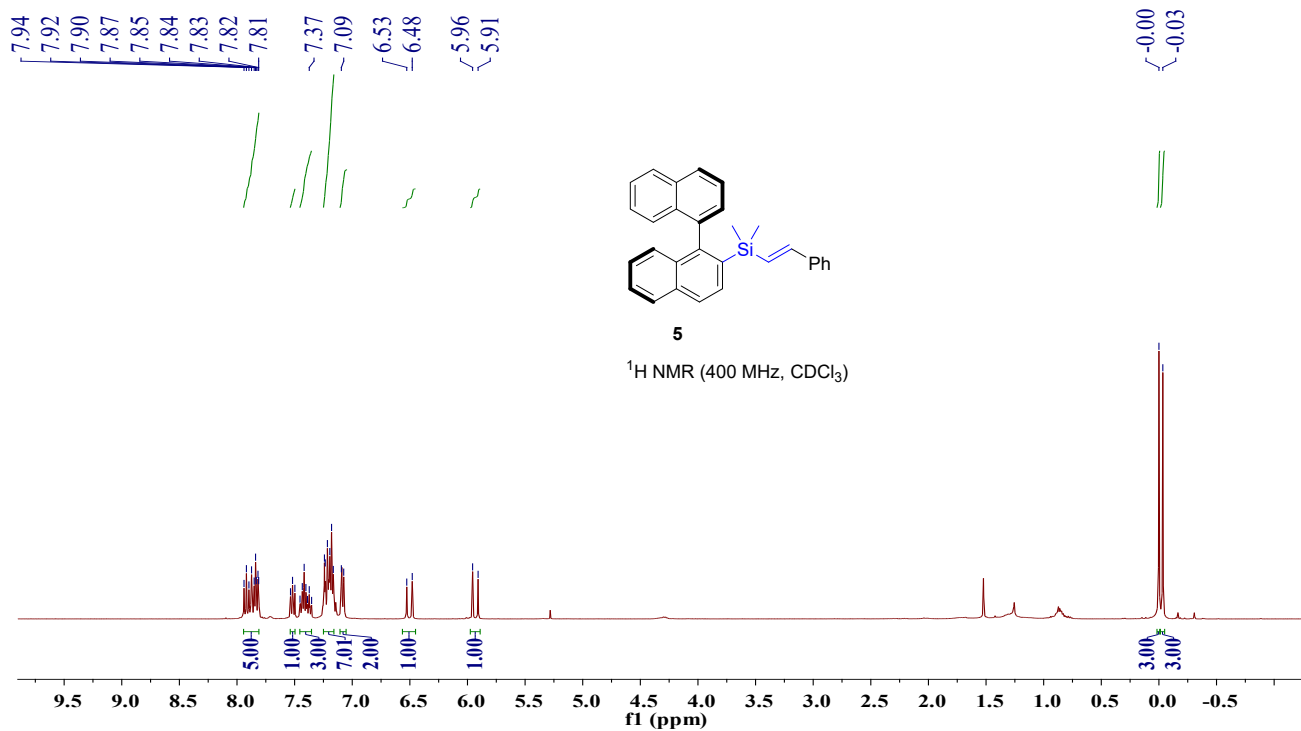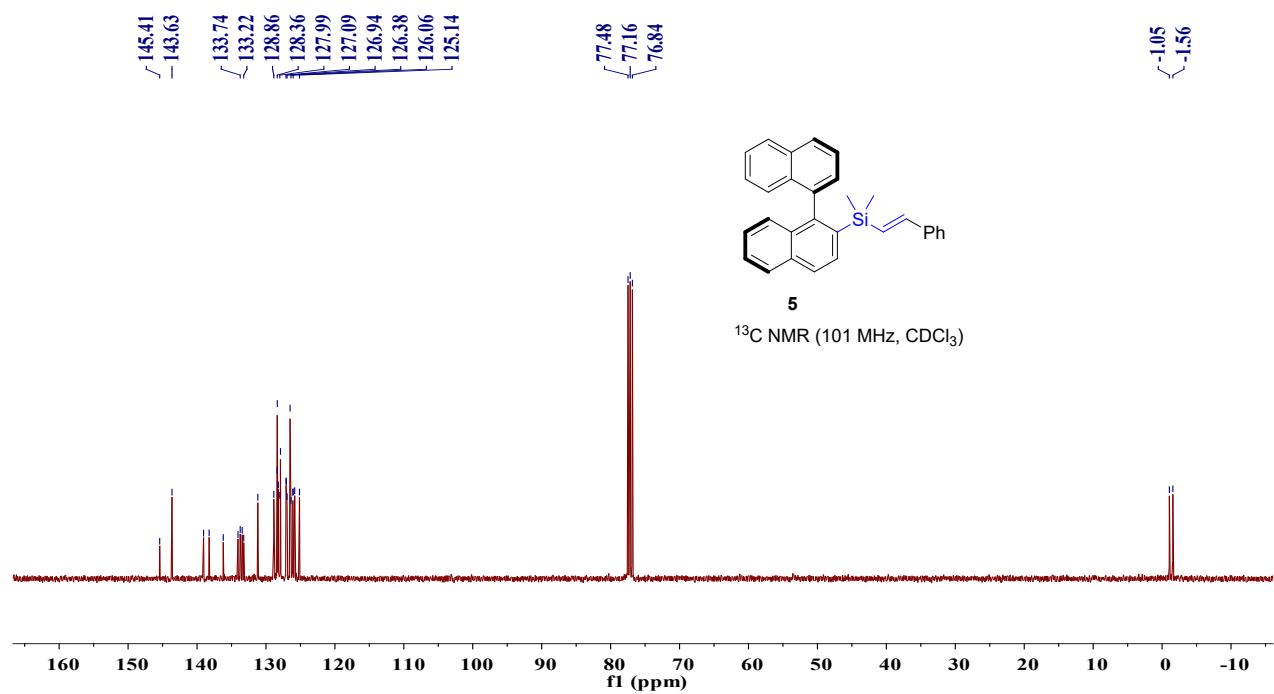



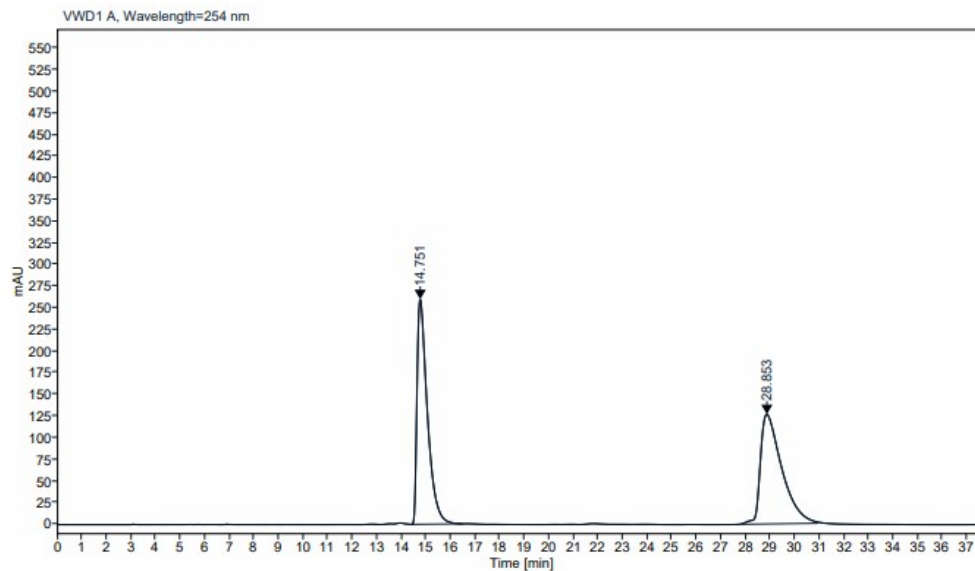

### Results

| No. | RT[min] | Area       | Height   | Relative Height % | Relative Area % |
|-----|---------|------------|----------|-------------------|-----------------|
|     | 14.751  | 7631.9165  | 259.7105 | 67.23             | 49.94           |
|     | 28.853  | 7650.7178  | 126.5722 | 32.77             | 50.06           |
| SUM | 43.604  | 15282.6343 | 386.2827 | 100.00            | 100.00          |

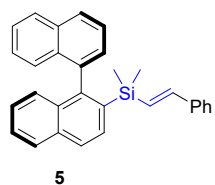

5

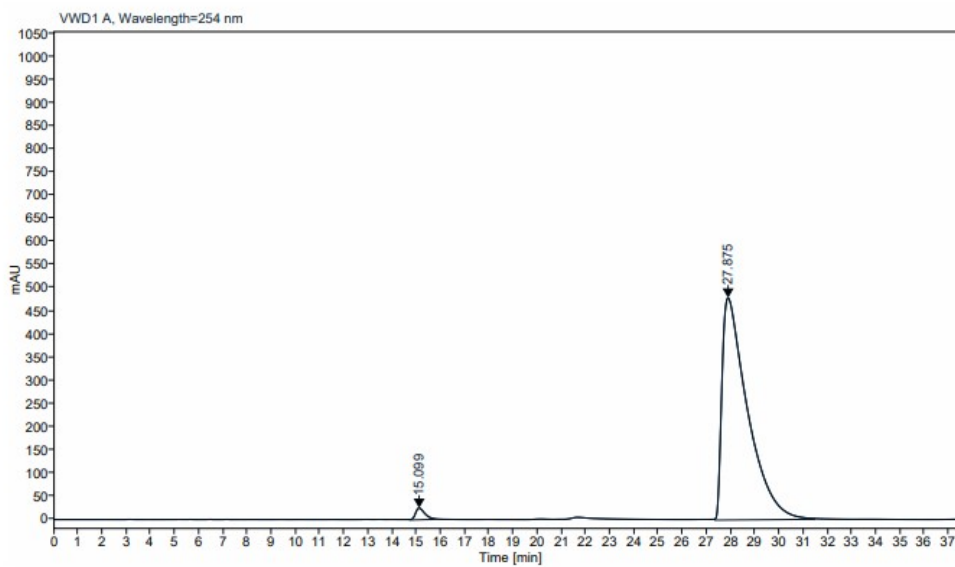

### Results

| No. | RT[min] | Area       | Height   | Relative Height % | Relative Area % |
|-----|---------|------------|----------|-------------------|-----------------|
|     | 15.099  | 677.7655   | 25.1042  | 4.98              | 1.89            |
|     | 27.875  | 35184.8125 | 479.4846 | 95.02             | 98.11           |
| SUM | 42.973  | 35862.5780 | 504.5888 | 100.00            | 100.00          |

### 3.3. Application of chiral alkene ligands.

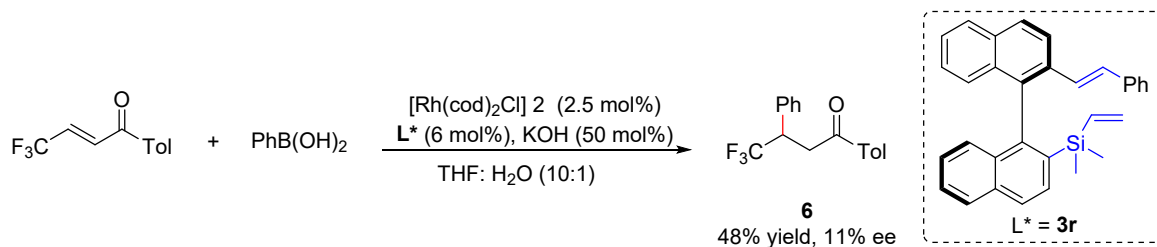

The procedure was conducted in an argon-filled glove box.  $[\text{Rh}(\text{cod})_2\text{Cl}]_2$  (2.47 mg) and **3r** (5.3 mg) in THF (1.0 mL) were charged into a 25 mL pressure tube under argon. The mixture was stirred for 30 min at 60 °C. Then enone (42.84 mg, 0.2 mmol, 1.0 equiv),  $\text{PhB}(\text{OH})_2$  (29.27 mg, 0.24 mmol, 1.2 equiv) and KOH (5.62 mg, 10 mol%) in  $\text{H}_2\text{O}$  (0.1 mL) were added to the reaction mixture sequentially. The reaction tube was sealed and stirred at -30 °C. After the reaction was completed (48 h), the reaction mixture was filtered through a pad of celite, eluted with ethyl acetate, concentrated, and purified by silica gel chromatography (PE:DCM = 10:1) to give the indicated product **6** (28.1 mg, 48% yield, 11% ee), HPLC analysis on a Chiralcel OD-H column (hexane/isopropanol = 95/5, flow rate 1.0 mL/min),  $t_{\text{R}} = 4.7$  min (major),  $t_{\text{R}} = 5.3$  min (minor).  $^1\text{H}$  NMR (400 MHz,  $\text{CDCl}_3$ )  $\delta$  7.81 (d,  $J = 8.2$  Hz, 2H), 7.38 (d,  $J = 7.2$  Hz, 2H), 7.31 – 7.27 (m, 3H), 7.23 (d,  $J = 8.0$  Hz, 2H), 4.29 – 4.19 (m, 1H), 3.69 – 3.53 (m, 2H), 2.38 (s, 3H).  $^{13}\text{C}$  NMR (151 MHz,  $\text{CDCl}_3$ )  $\delta$  195.0, 144.6, 134.8, 134.0, 129.9, 129.5, 129.2, 128.8, 128.4, 128.3, 127.2 (q,  $J = 279.5$  Hz), 45.0 (q,  $J = 27.3$  Hz), 38.2, 21.7.  $^{19}\text{F}$  NMR (376 MHz,  $\text{CDCl}_3$ )  $\delta$  -69.57 (d,  $J = 9.7$  Hz, 3F). HRMS (ESI,  $m/z$ ): calcd for  $\text{C}_{17}\text{H}_{16}\text{F}_3\text{O}^+$   $[\text{M} + \text{H}]^+$ : 293.1148, found 293.1150.

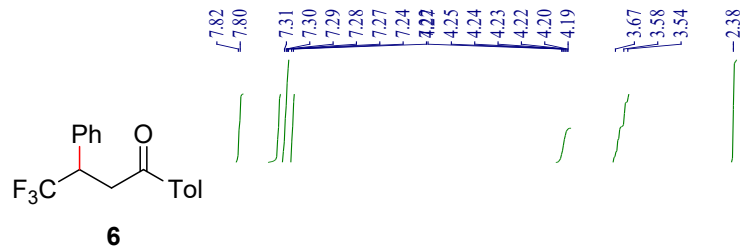

<sup>1</sup>H NMR (400 MHz, CDCl<sub>3</sub>)

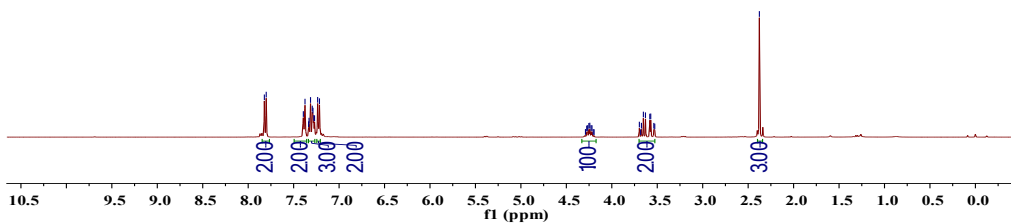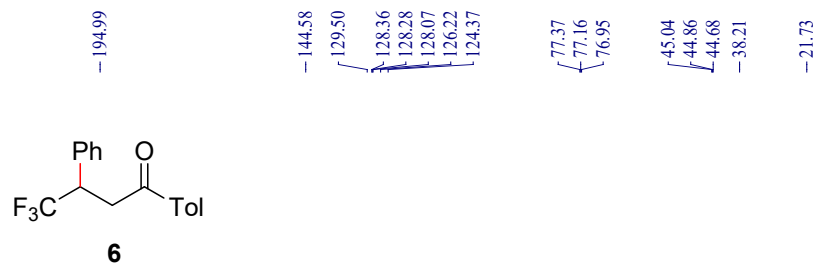

<sup>13</sup>C NMR (151 MHz, CDCl<sub>3</sub>)

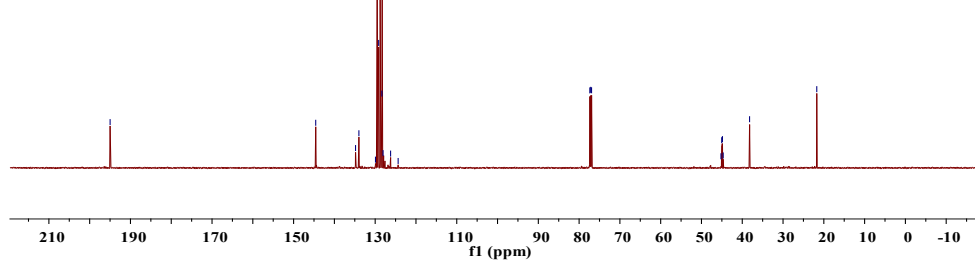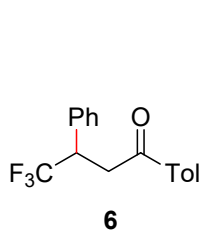

<sup>19</sup>F NMR (376 MHz, CDCl<sub>3</sub>)

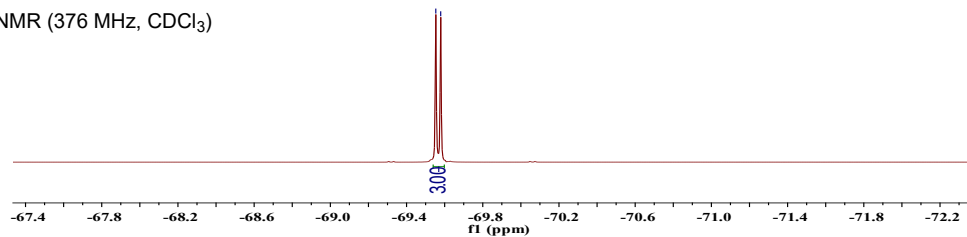

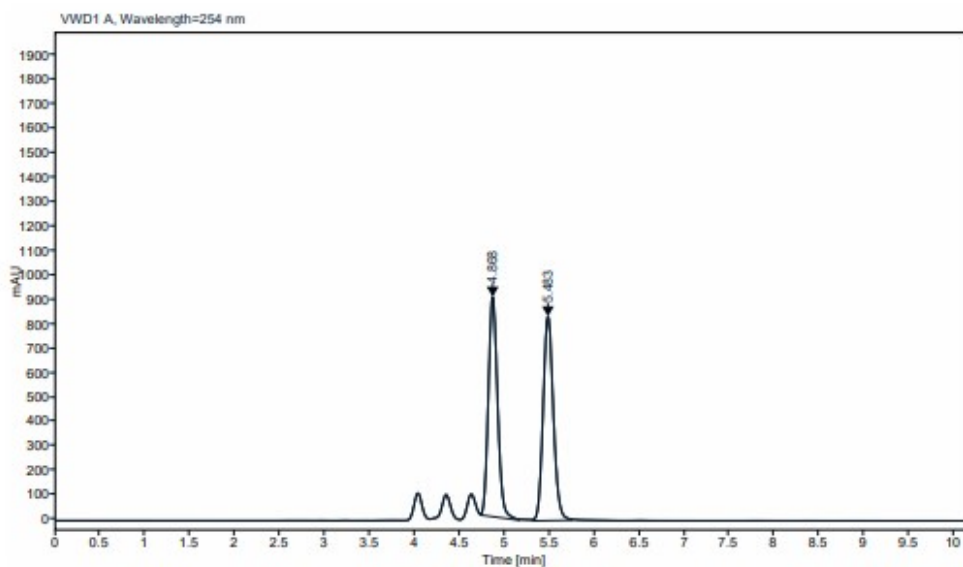

**Results**

| No. | RT [min] | Area       | Height    | Relative Height % | Relative Area % |
|-----|----------|------------|-----------|-------------------|-----------------|
|     | 4.868    | 6427.4795  | 901.7827  | 51.84             | 49.18           |
|     | 5.483    | 6642.4634  | 837.7372  | 48.16             | 50.82           |
| SUM | 10.351   | 13069.9429 | 1739.5199 | 100.00            | 100.00          |

**<Chromatogram>**

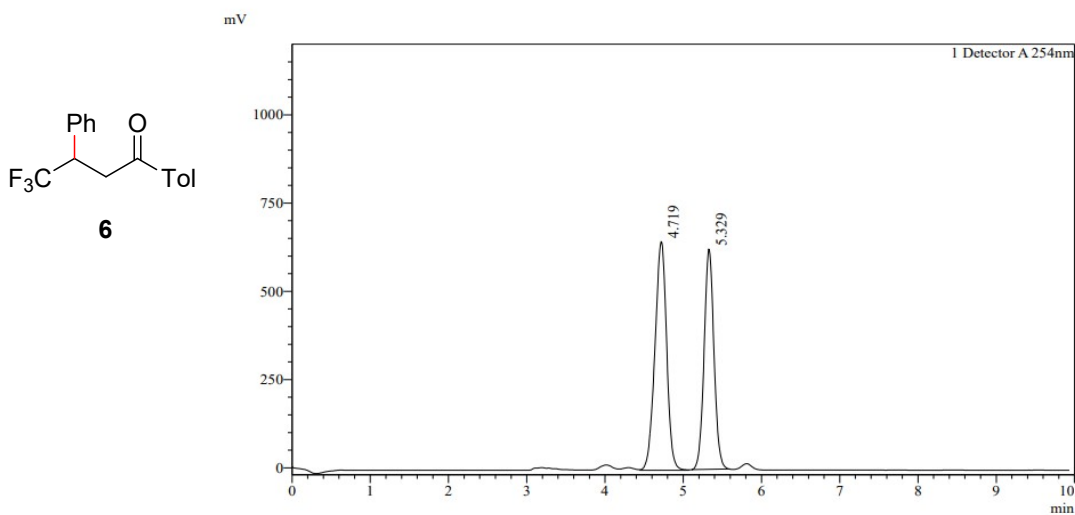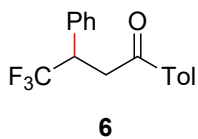

**<Peak Table>**

Detector A 254nm

| Peak# | Ret. Time | Area     | Height  | Conc.  | Area%   |
|-------|-----------|----------|---------|--------|---------|
| 1     | 4.719     | 6739566  | 647141  | 55.238 | 55.238  |
| 2     | 5.329     | 5461293  | 623850  | 44.762 | 44.762  |
| Total |           | 12200859 | 1270991 |        | 100.000 |

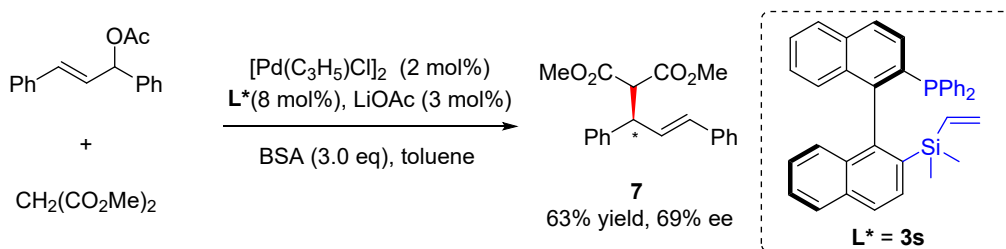

A mixture of  $[\text{PdCl}(\text{C}_3\text{H}_5)]_2$  (1.83 mg, 2.0 mol%), the chiral ligand **3s** (11.50 mg, 8.0 mol%, 99% ee) in toluene (0.5 mL) was stirred at 30 °C for 30 min under nitrogen atmosphere. Then allylic substrate (63.10 mg, 0.25 mmol, 1.0 equiv) and toluene (0.5 mL) were added and stirred for another 30 minutes. Subsequently,  $\text{CH}_2(\text{CO}_2\text{Me})$  (99.08 mg, 0.75 mmol, 3.0 equiv), bis(trimethylsilyl)acetamide (152.27 mg, 0.75 mmol, 3.0 equiv) and lithium acetate (0.50 mg, 3.0 mol%) were added. The mixture was stirred at 60 °C for three hours. At the end of the reaction, the saturated ammonium chloride solution (two drops) was added to quench the reaction. The mixture was diluted with ethyl acetate, filtered, and concentrated under the reduced pressure. The crude residue was purified by flash column chromatography on silica gel using hexanes/ethyl acetate (20:1) as eluent to give the corresponding product **7** (51.0 mg, 63% yield, 69% ee), HPLC analysis on a Chiralcel AD-H column (hexane/isopropanol = 95/5, flow rate 1.0 mL/min):  $t_{\text{R}} = 13.9$  min (major),  $t_{\text{R}} = 19.2$  min (minor).  $[\alpha]_{\text{D}}^{26} = 3.0$  (c 0.50,  $\text{CHCl}_3$ ).  $^1\text{H}$  NMR (400 MHz,  $\text{CDCl}_3$ )  $\delta$  7.32 – 7.16 (m, 10H), 6.48 (d,  $J = 15.8$  Hz, 1H), 6.33 (dd,  $J = 15.8, 8.6$  Hz, 1H), 4.27 (dd,  $J = 10.8, 8.6$  Hz, 1H), 3.96 (d,  $J = 10.8$  Hz, 1H), 3.68 (s, 3H), 3.49 (s, 3H).  $^{13}\text{C}$  NMR (101 MHz,  $\text{CDCl}_3$ )  $\delta$  168.2, 167.8, 140.2, 136.9, 131.9, 129.2, 128.8, 128.5, 127.9, 127.6, 127.2, 126.4, 57.7, 52.7, 52.5, 49.3. HRMS (ESI,  $m/z$ ): calcd for  $\text{C}_{20}\text{H}_{20}\text{O}_4\text{Na}^+$   $[\text{M} + \text{Na}]^+$ : 347.1254, found 347.1253.

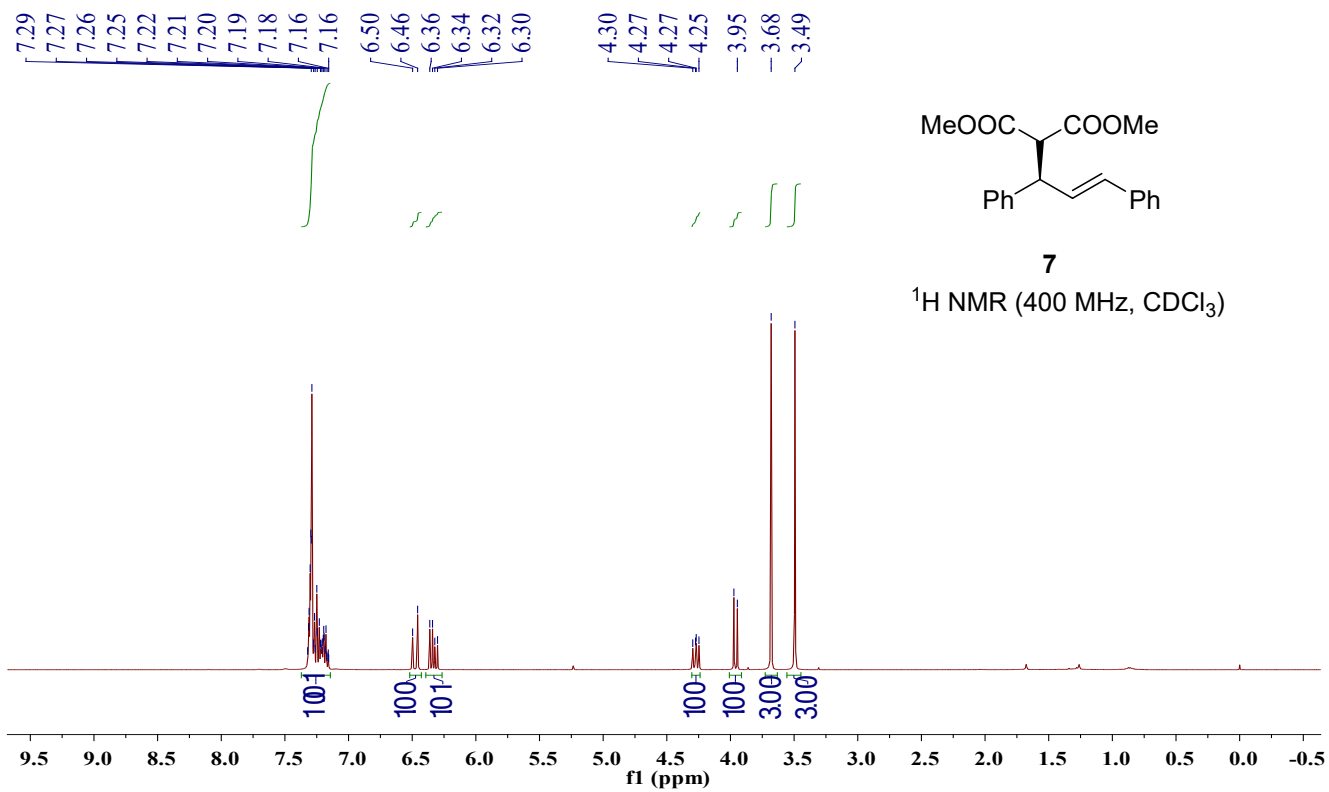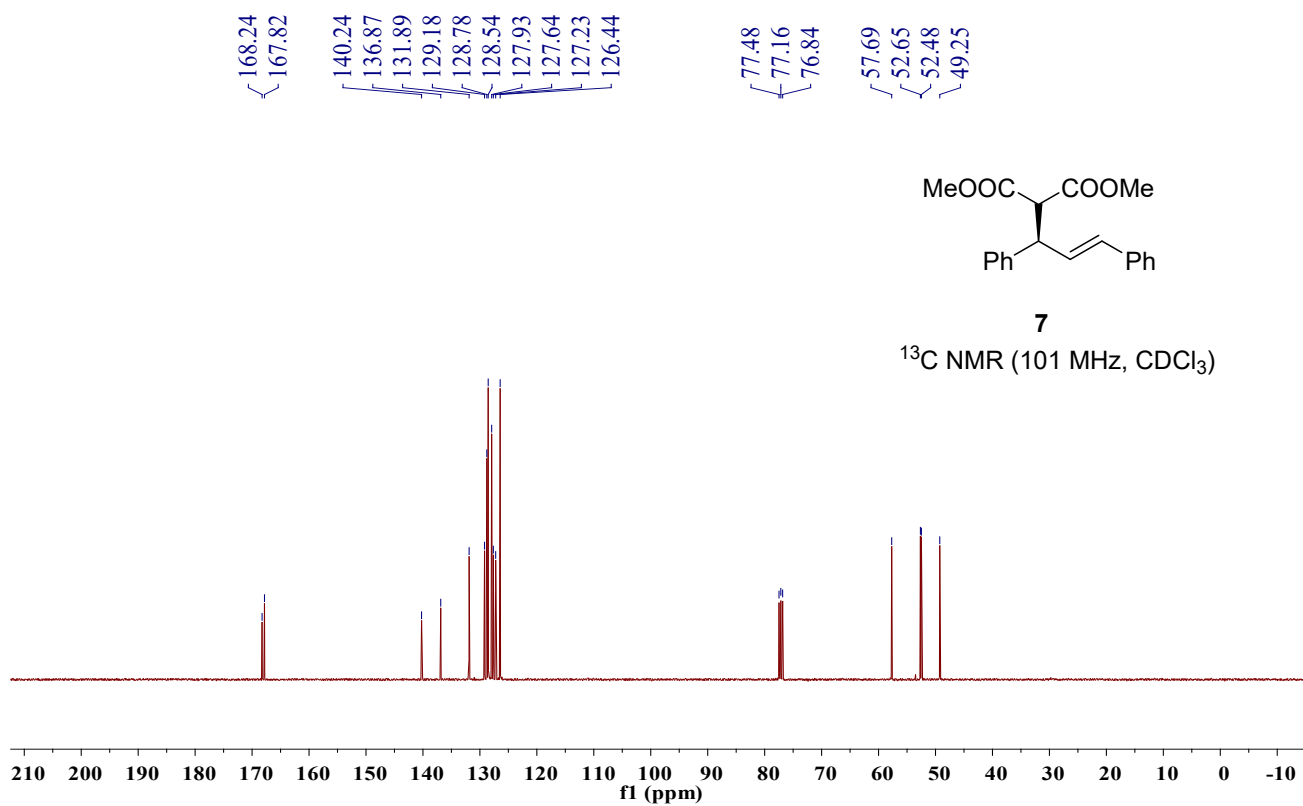

### <Chromatogram>

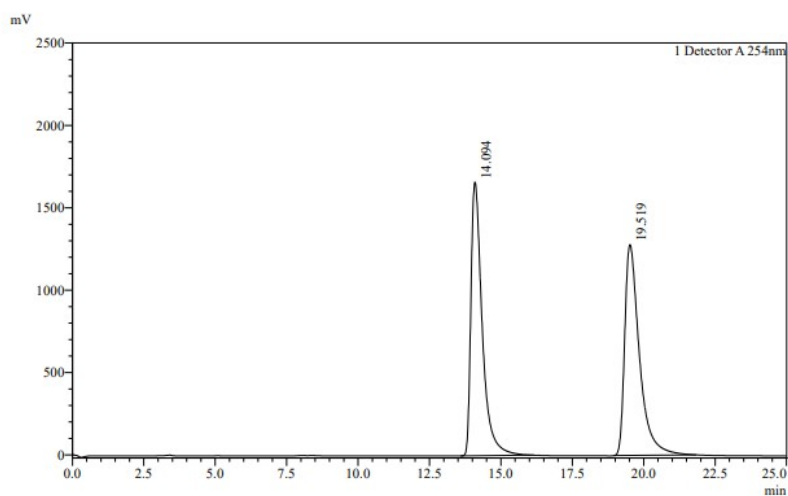

### <Peak Table>

| Detector A 254nm |           |          |         |        |         |
|------------------|-----------|----------|---------|--------|---------|
| Peak#            | Ret. Time | Area     | Height  | Conc.  | Area%   |
| 1                | 14.094    | 45635873 | 1660381 | 49.868 | 49.868  |
| 2                | 19.519    | 45878087 | 1279880 | 50.132 | 50.132  |
| Total            |           | 91513960 | 2940261 |        | 100.000 |

### <Chromatogram>

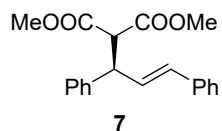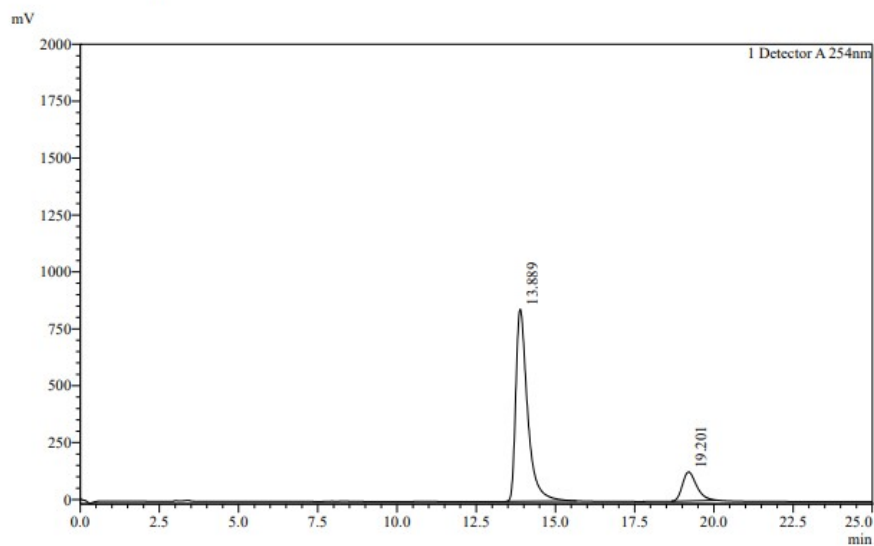

### <Peak Table>

| Detector A 254nm |           |          |        |        |         |
|------------------|-----------|----------|--------|--------|---------|
| Peak#            | Ret. Time | Area     | Height | Conc.  | Area%   |
| 1                | 13.889    | 21843830 | 843961 | 84.597 | 84.597  |
| 2                | 19.201    | 3977116  | 127230 | 15.403 | 15.403  |
| Total            |           | 25820946 | 971191 |        | 100.000 |

## 4. X-Ray Crystallographic Data

**Crystal structure details for 3v** (CCDC 2387787). Thermal ellipsoids are shown at 50 % probability level (two molecules in each unit). Single crystals suitable for X-ray diffraction were obtained by slow evaporation of CH<sub>2</sub>Cl<sub>2</sub> solution of **3v**.

**Table 1 Crystal data and structure refinement for 3v.**

|                                             |                                                               |
|---------------------------------------------|---------------------------------------------------------------|
| Identification code                         | <b>3v</b>                                                     |
| Empirical formula                           | C <sub>34</sub> H <sub>26</sub> Si                            |
| Formula weight                              | 462.64                                                        |
| Temperature/K                               | 293(2)                                                        |
| Crystal system                              | monoclinic                                                    |
| Space group                                 | P2 <sub>1</sub>                                               |
| a/Å                                         | 14.5996(2)                                                    |
| b/Å                                         | 9.42640(10)                                                   |
| c/Å                                         | 18.8989(2)                                                    |
| α/°                                         | 90                                                            |
| β/°                                         | 94.4420(10)                                                   |
| γ/°                                         | 90                                                            |
| Volume/Å <sup>3</sup>                       | 2593.09(5)                                                    |
| Z                                           | 4                                                             |
| ρ <sub>calc</sub> /cm <sup>3</sup>          | 1.185                                                         |
| μ/mm <sup>-1</sup>                          | 0.932                                                         |
| F(000)                                      | 976.0                                                         |
| Crystal size/mm <sup>3</sup>                | 0.3 × 0.12 × 0.06                                             |
| Radiation                                   | CuKα (λ = 1.54178)                                            |
| 2θ range for data collection/°              | 7.382 to 133.176                                              |
| Index ranges                                | -15 ≤ h ≤ 17, -11 ≤ k ≤ 11, -22 ≤ l ≤ 22                      |
| Reflections collected                       | 43685                                                         |
| Independent reflections                     | 9145 [R <sub>int</sub> = 0.1162, R <sub>sigma</sub> = 0.0603] |
| Data/restraints/parameters                  | 9145/1/631                                                    |
| Goodness-of-fit on F <sup>2</sup>           | 1.054                                                         |
| Final R indexes [I ≥ 2σ (I)]                | R <sub>1</sub> = 0.0583, wR <sub>2</sub> = 0.1551             |
| Final R indexes [all data]                  | R <sub>1</sub> = 0.0631, wR <sub>2</sub> = 0.1596             |
| Largest diff. peak/hole / e Å <sup>-3</sup> | 0.53/-0.24                                                    |
| Flack parameter                             | 0.03(3)                                                       |

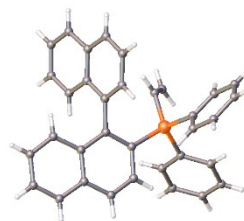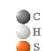



## 5. Supplementary References

- [1] S. F. Zhu, C. Wang, L. J. Chen, R. X. Liang, Y. F. Yu, H. F. Jiang, Modular Approach for Synthesis of Vicinal Diamines Containing Axial Chiral 1,1'-Binaphthyl from 1,2-Diaminoethane by Pd-Catalyzed N-Arylation Reactions, *Org. Lett.*, **2011**, *13*, 1146-1149.
- [2] X. T. Yang, G. Q. Xu, W. J. Tang, Efficient synthesis of chiral biaryls via asymmetric Suzuki-Miyaura cross-coupling of ortho-bromo aryl triflates, *Tetrahedron*, **2016**, *72*, 5178-5183.
- [3] J. B. Bremner, P. A. Keller, S. G. Pyne, T. P. Boyle, Z. Brkic, J. Morgan, K. Somphol, J. A. Coates, J. Deadman, D. I. Rhodes, Synthesis and antibacterial studies of binaphthyl-based tripeptoids. Part 2, *Bioorg. Med. Chem.*, **2010**, *18*, 4793-4800.
- [4] M. D. Visco, J. M. Wieting, A. E. Mattson, Carbon-Silicon Bond Formation in the Synthesis of Benzylic Silanes, *Org. Lett.*, **2016**, *18*, 2883-2885.
- [5] A. A. Ruch, S. Handa, F. Kong, V. N. Nesterov, D. R. Pahls, T. R. Cundaria, L. M. Slaughter, Competing amination and C-H arylation pathways in Pd/xantphos-catalyzed transformations of binaphthyl triflates: switchable routes to chiral amines and helicene derivatives, *Org. Biomol. Chem.*, **2016**, *14*, 8123-8140.
- [6] H. Kondo, T. Kochi, F. Kakiuchi, In Situ Generation of Ruthenium Carbonyl Phosphine Complexes as a Versatile Method for the Development of Enantioselective C-O Bond Arylation, *CHEM-EUR J*, **2020**, *26*, 1737-1741.
- [7] Z. P. Cao, Y. L. Liu, Z. Q. Liu, X. Q. Feng, M. Y. Zhuang, H. F. Du, Pd-Catalyzed Asymmetric Allylic Alkylation of Indoles and Pyrroles by Chiral Alkene-Phosphine Ligands, *Org. Lett.*, **2011**, *13*, 2164-2167.
- [8] Y. M. Yang, C. H. Wu, J. H. Xing, X. W. Dou, Developing Biarylhemicboronic Esters for Biaryl Atropisomer Synthesis via Dynamic Kinetic Atroposelective Suzuki-Miyaura Cross-Coupling, *J. Am. Chem. Soc.*, **2024**, *146*, 6283-6293.

## 6. NMR Spectra and HPLC Spectra

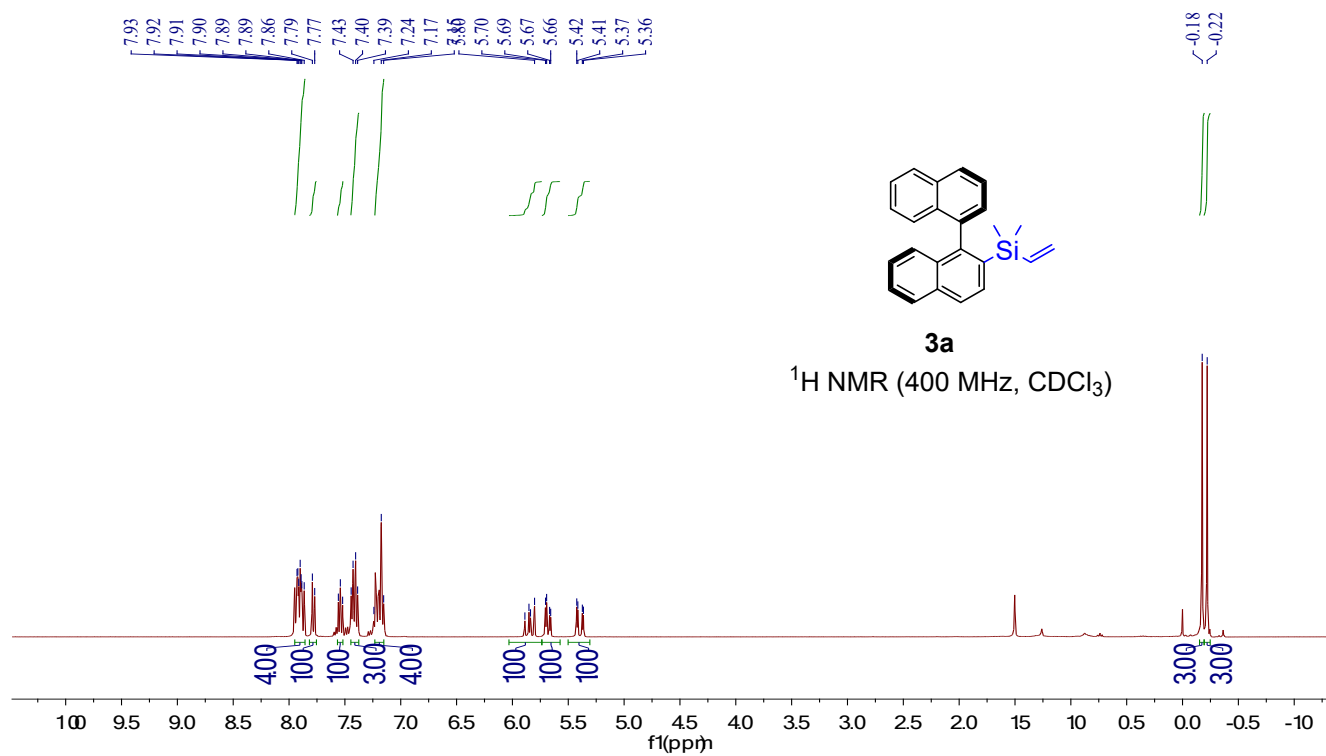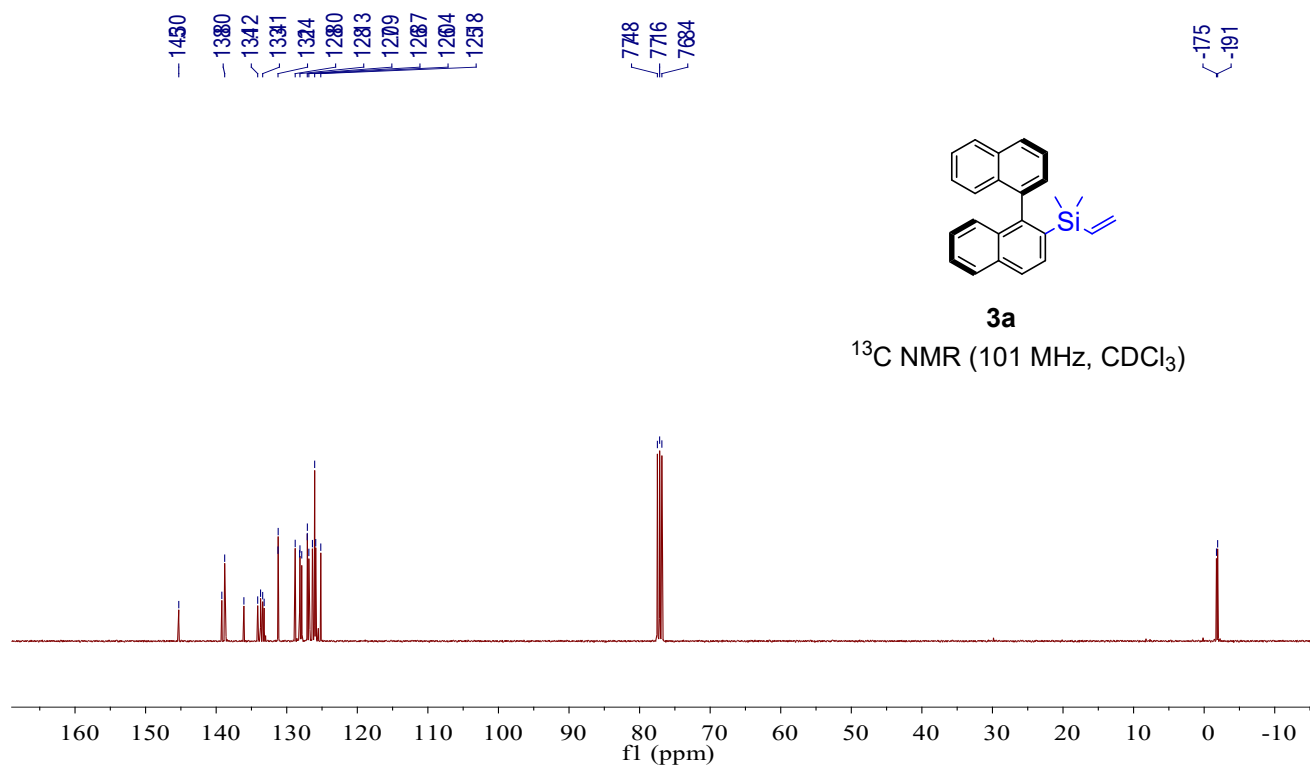

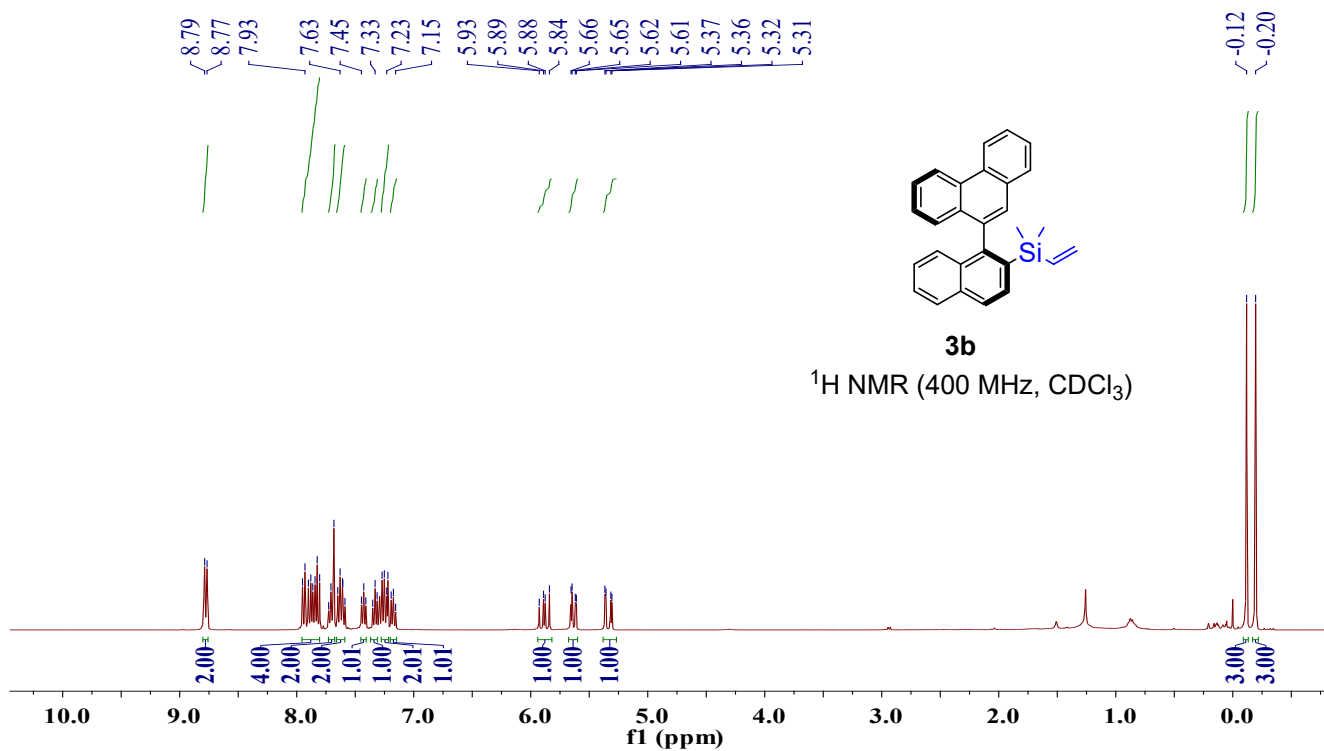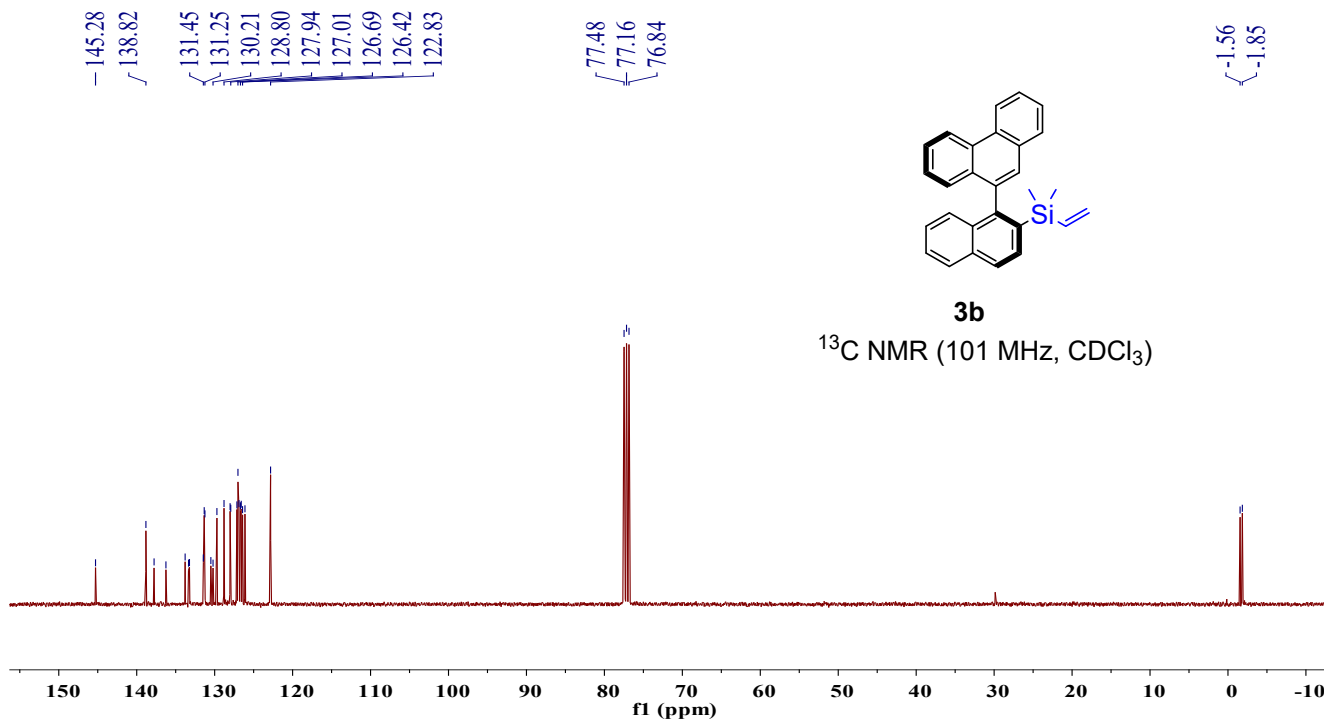

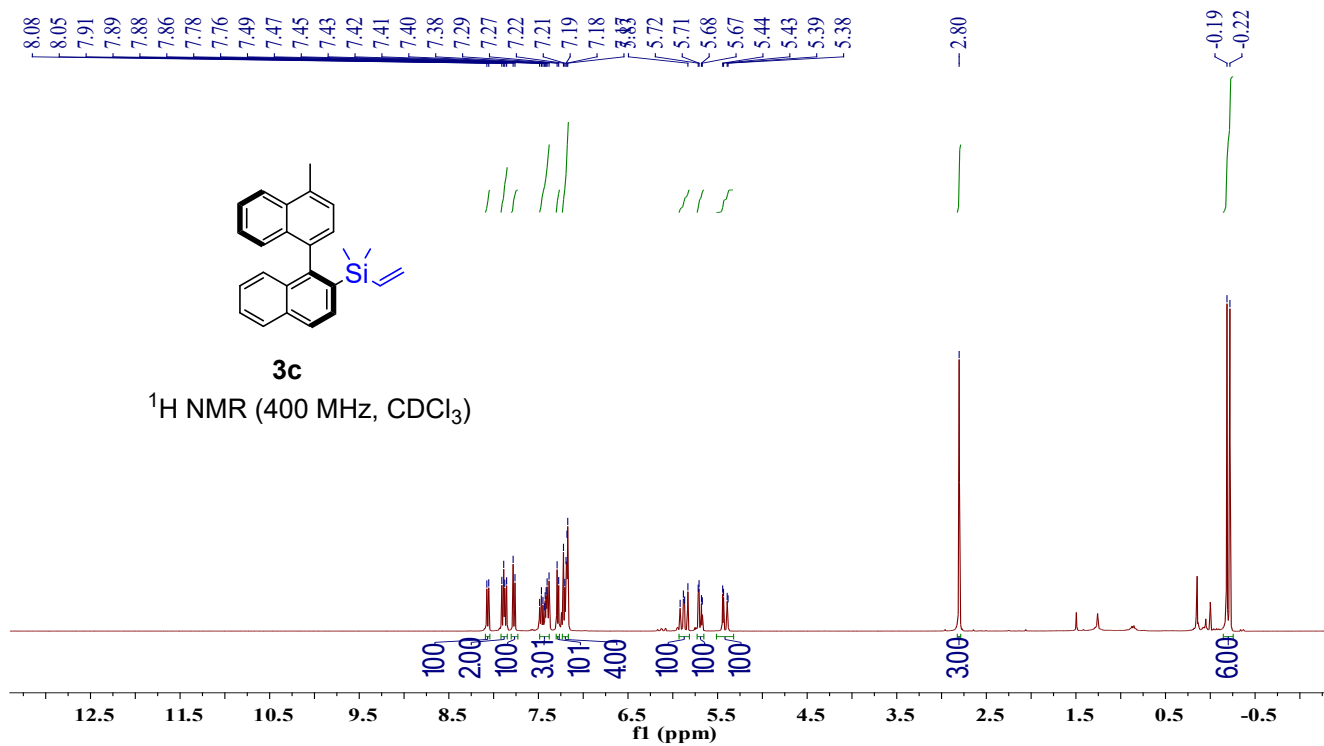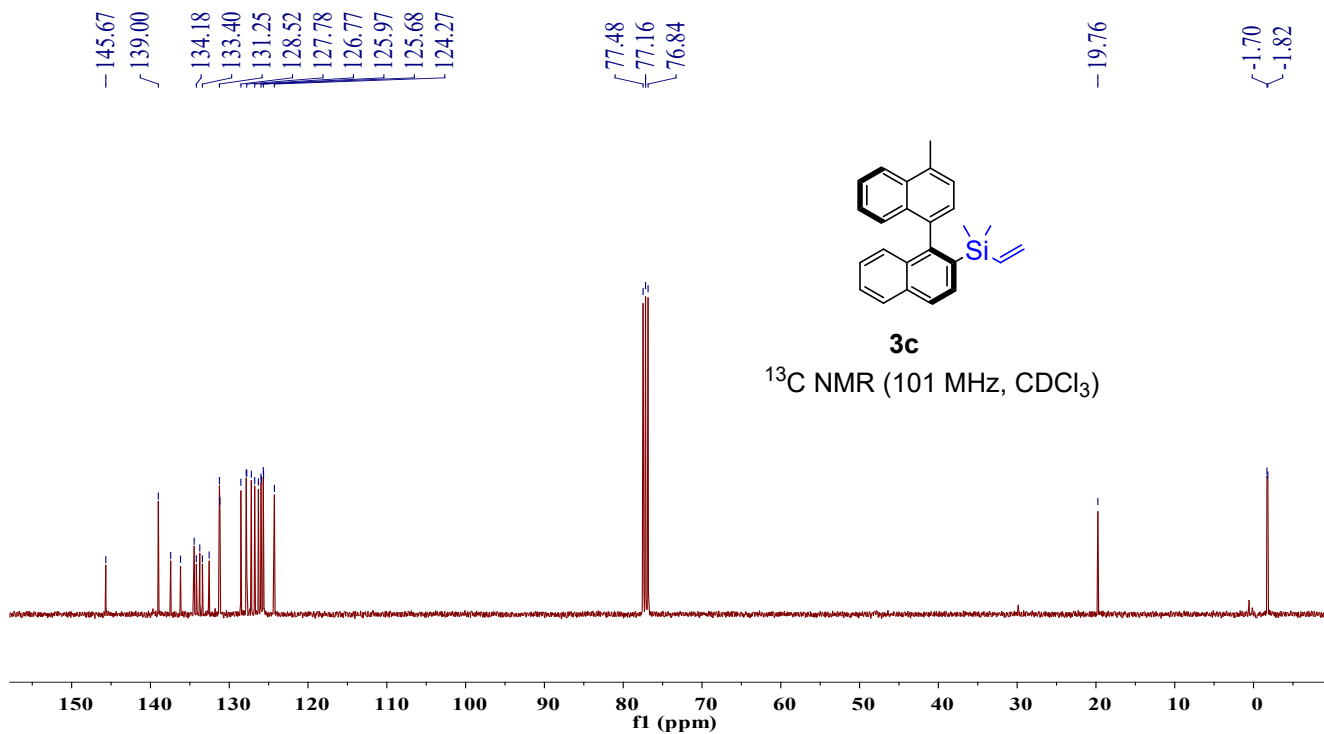

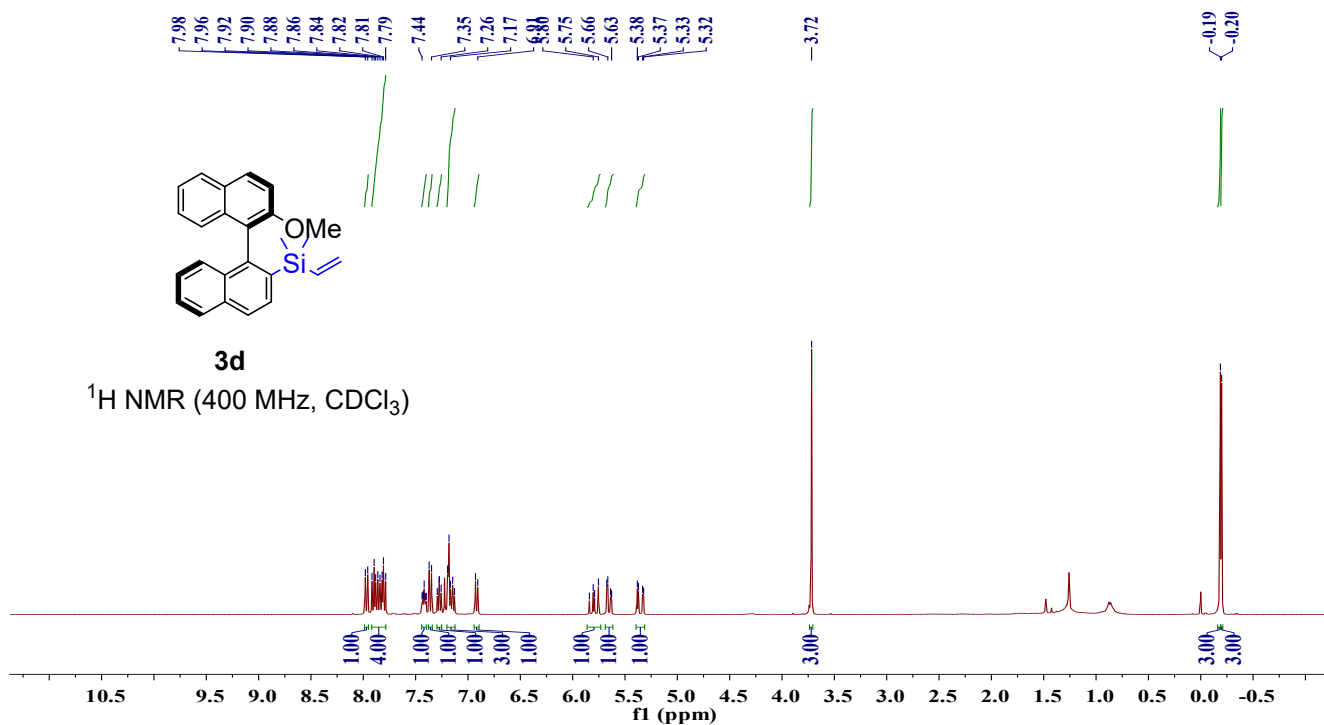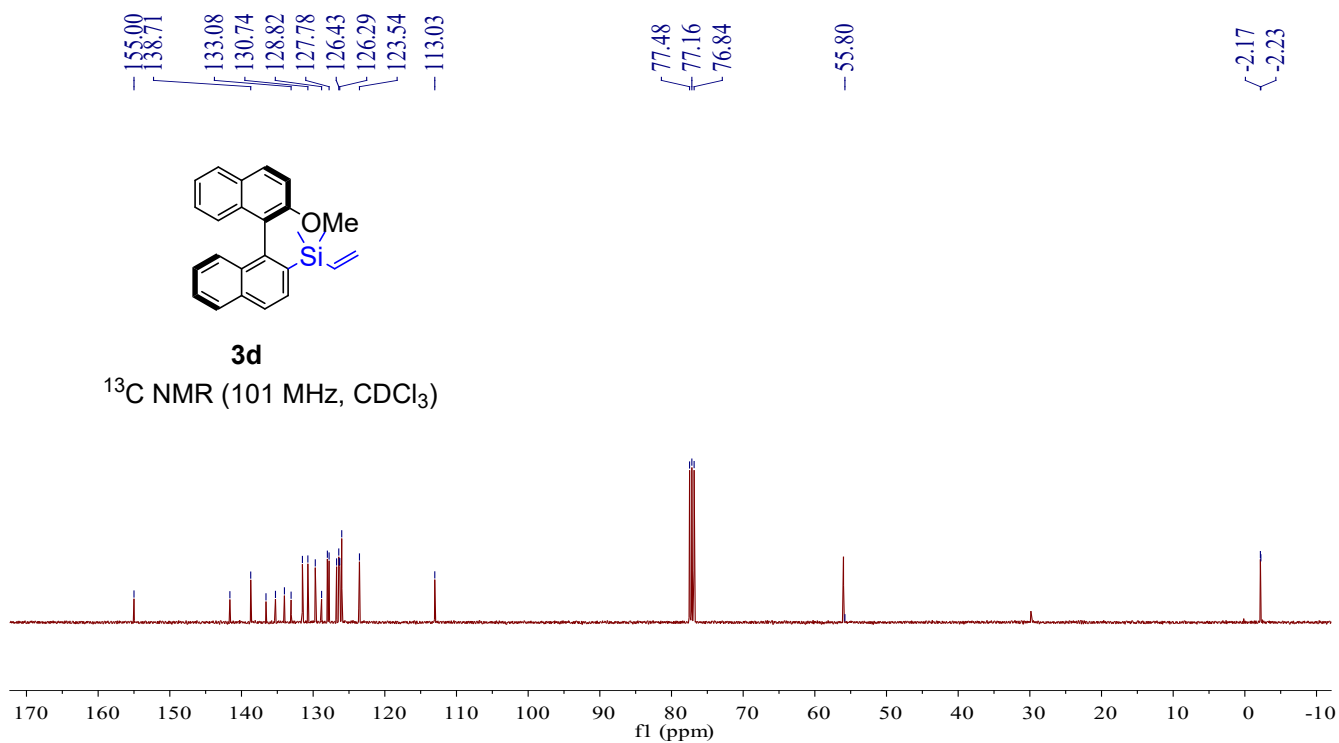

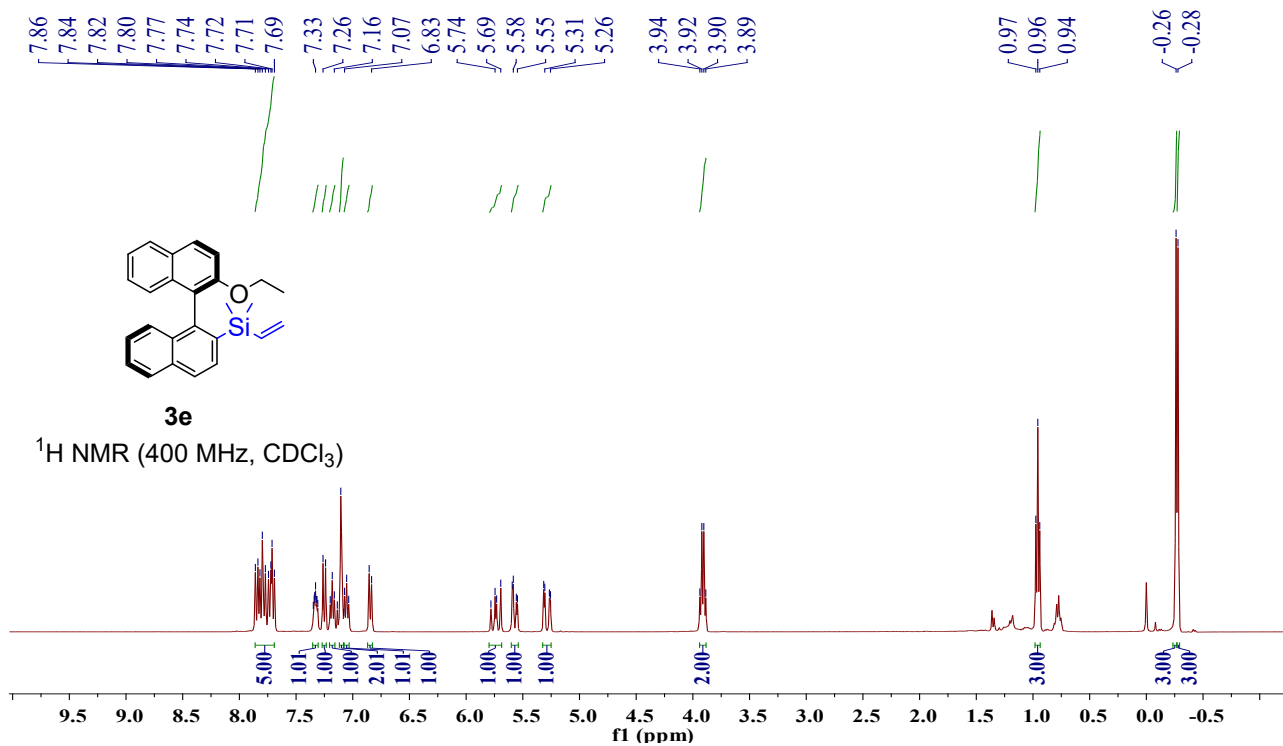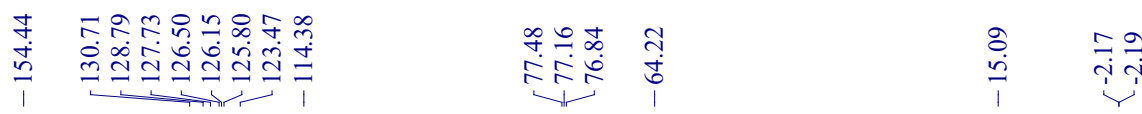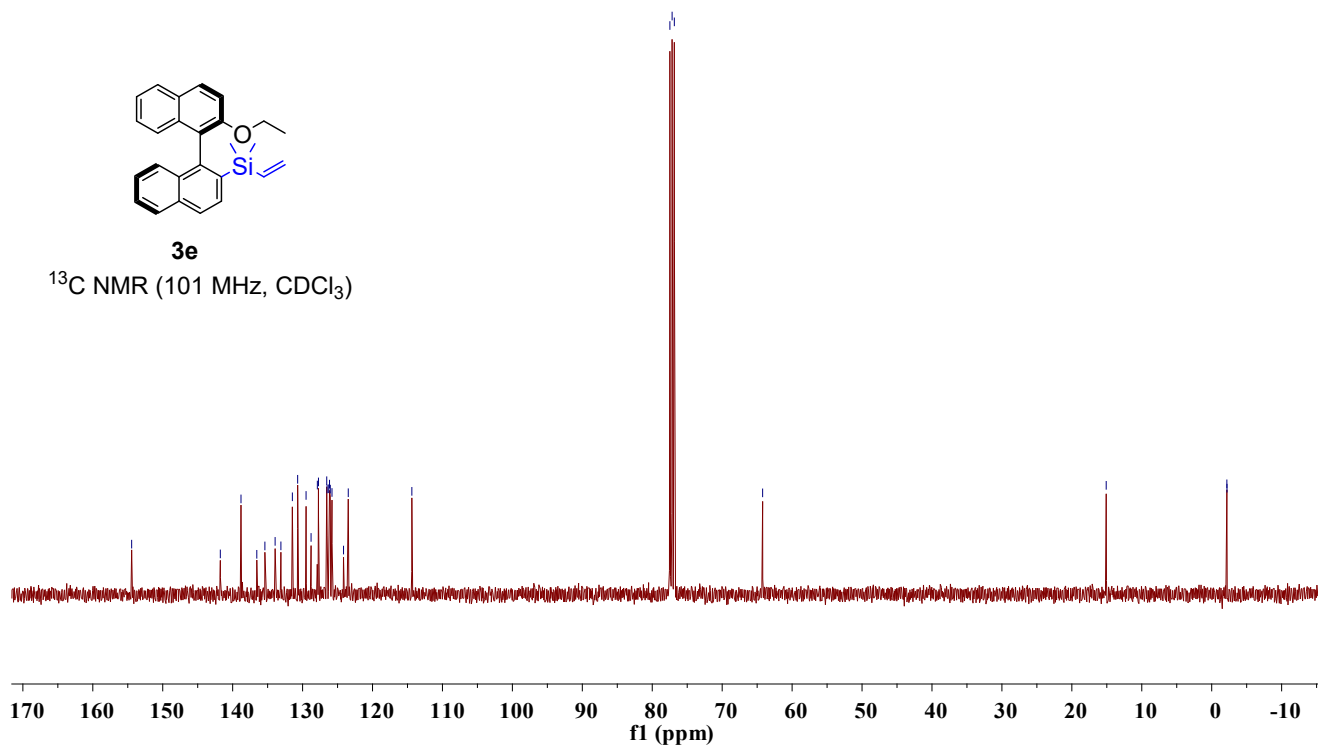

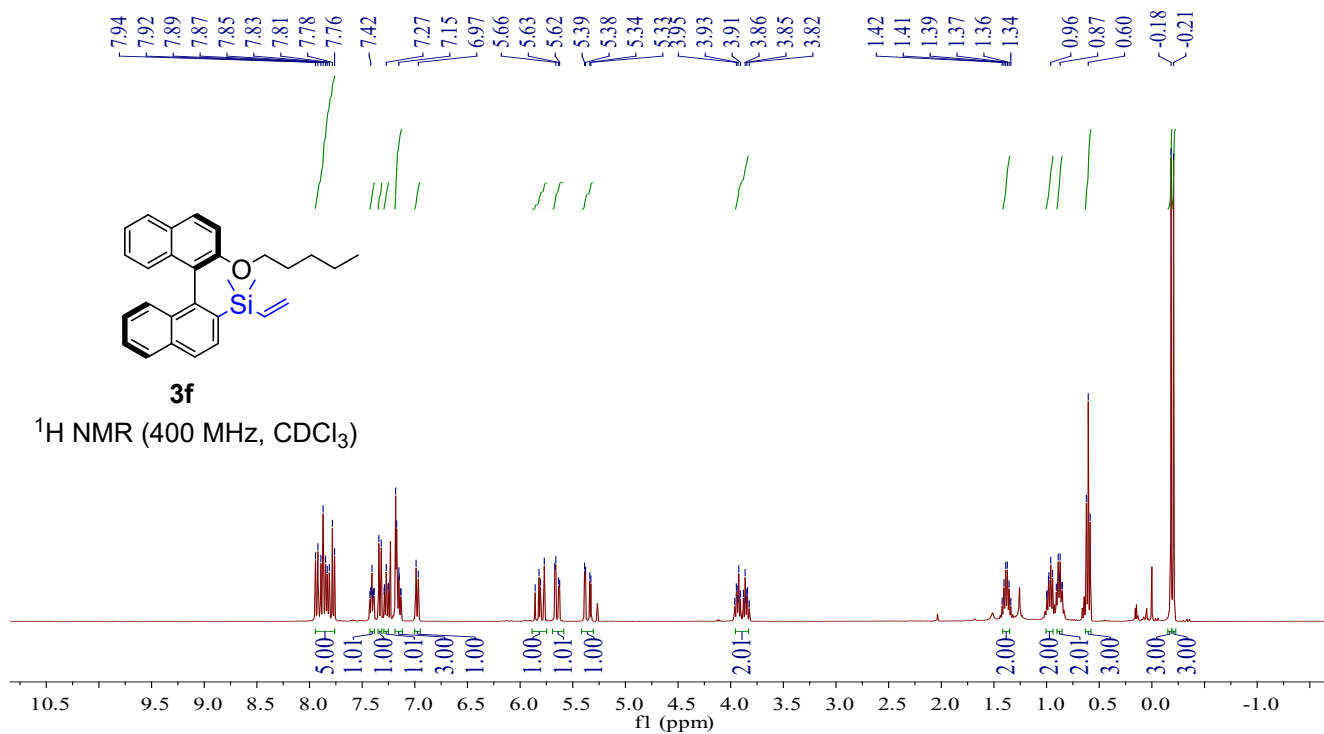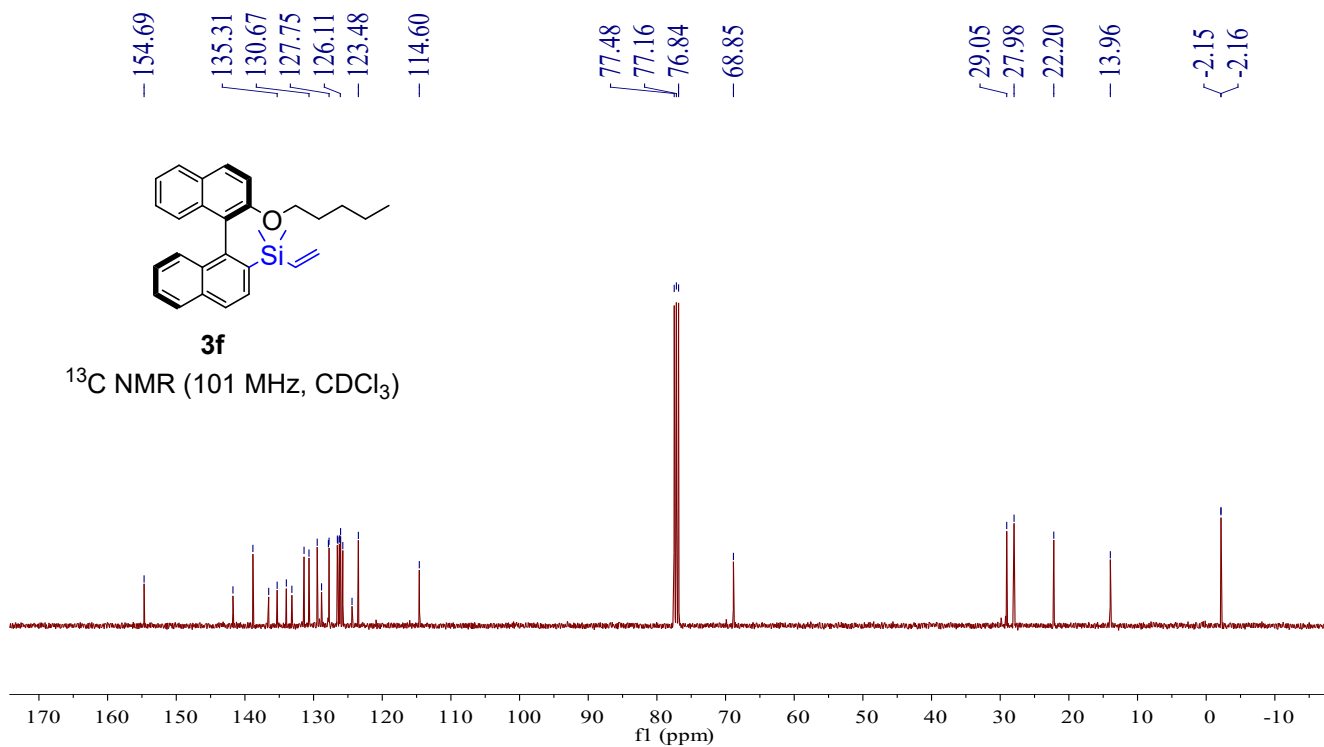

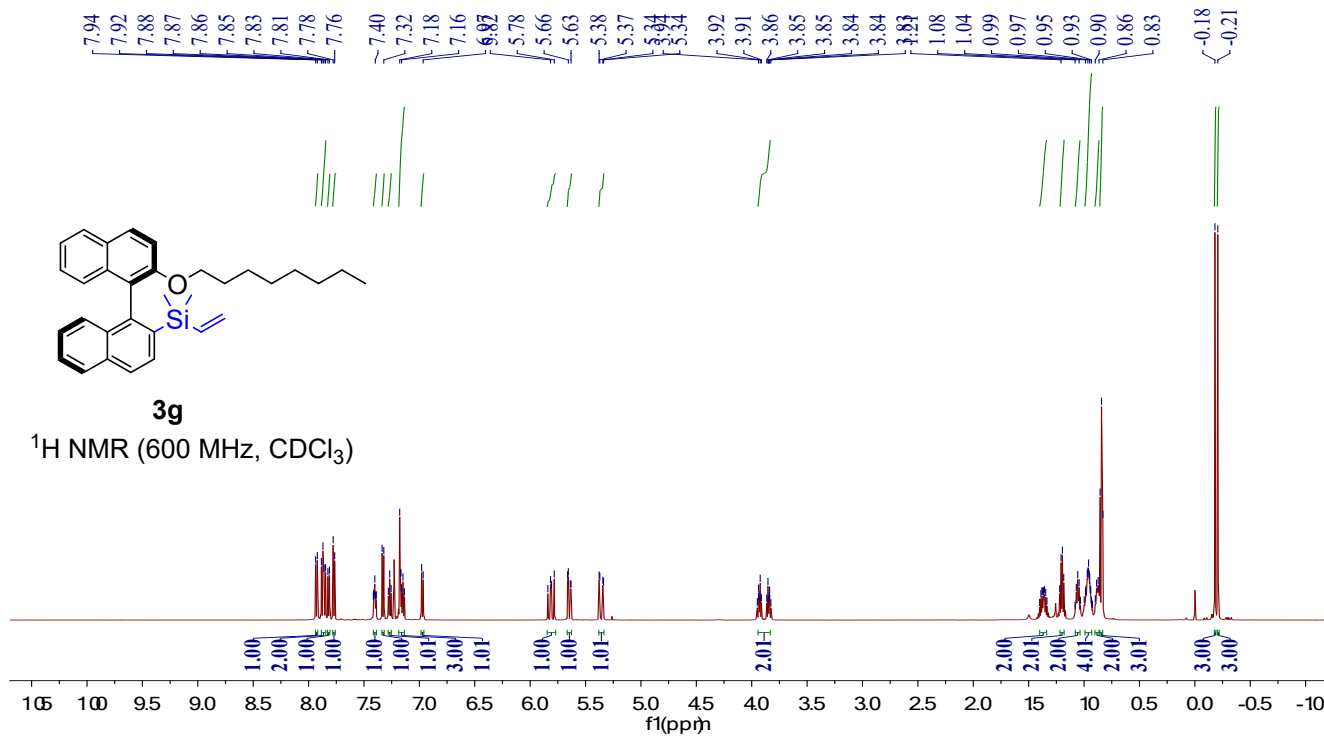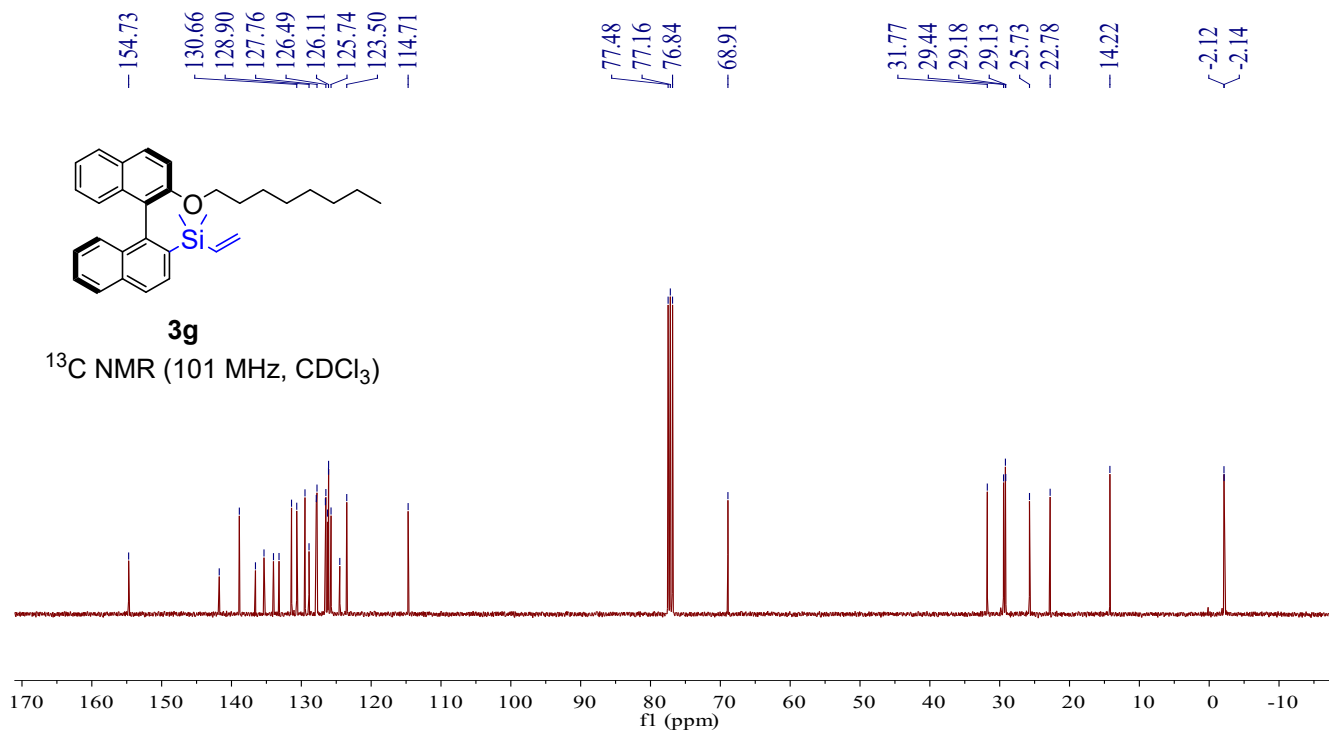



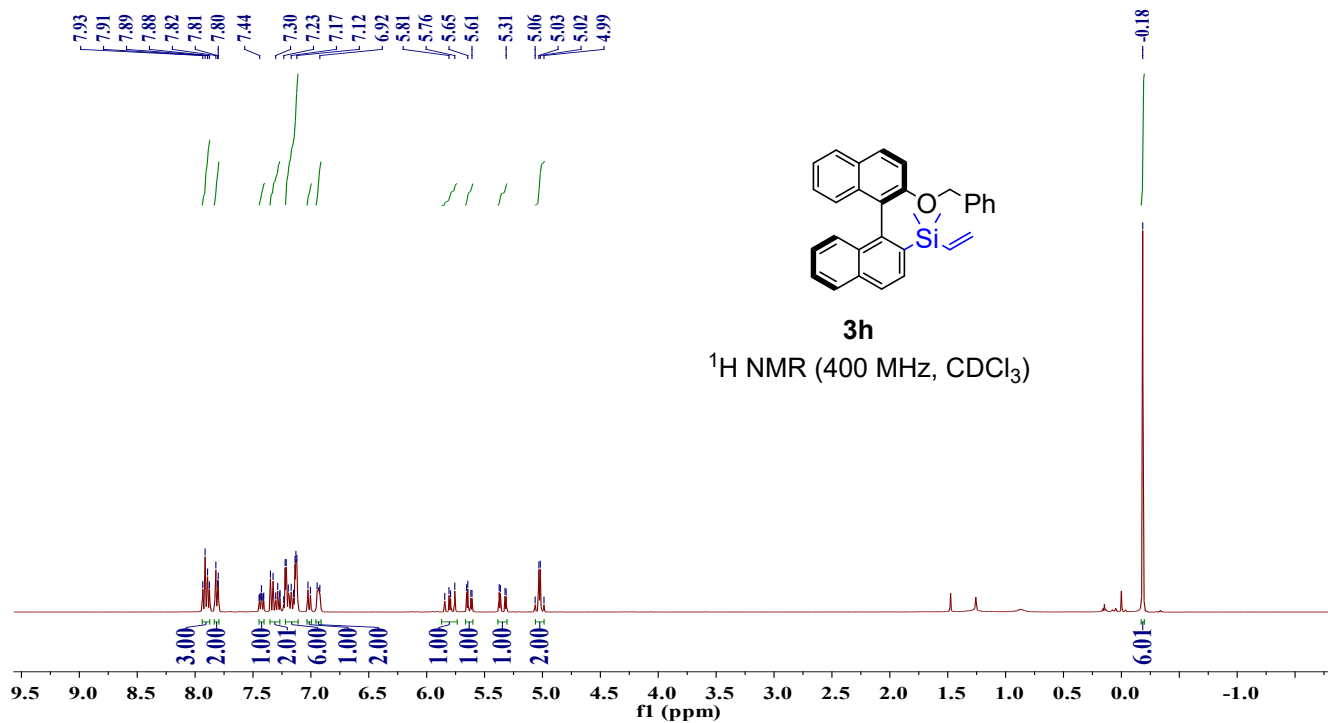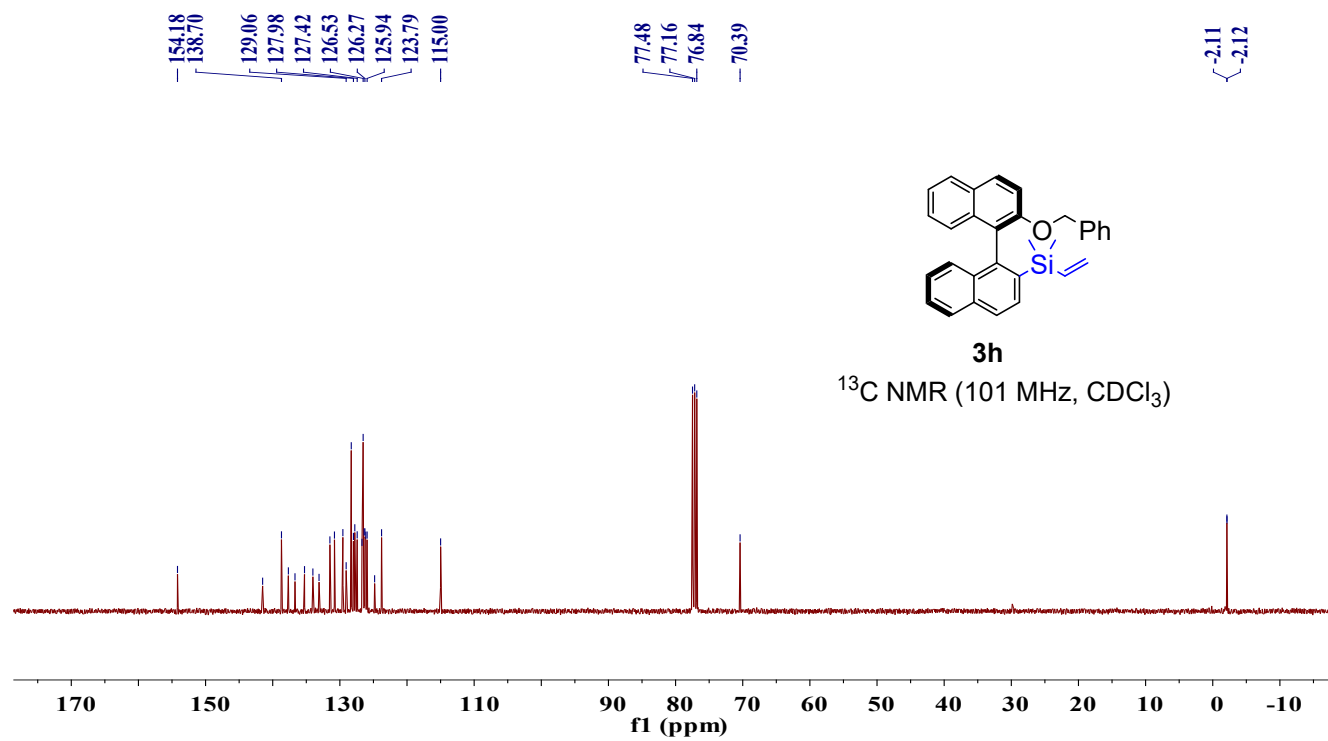

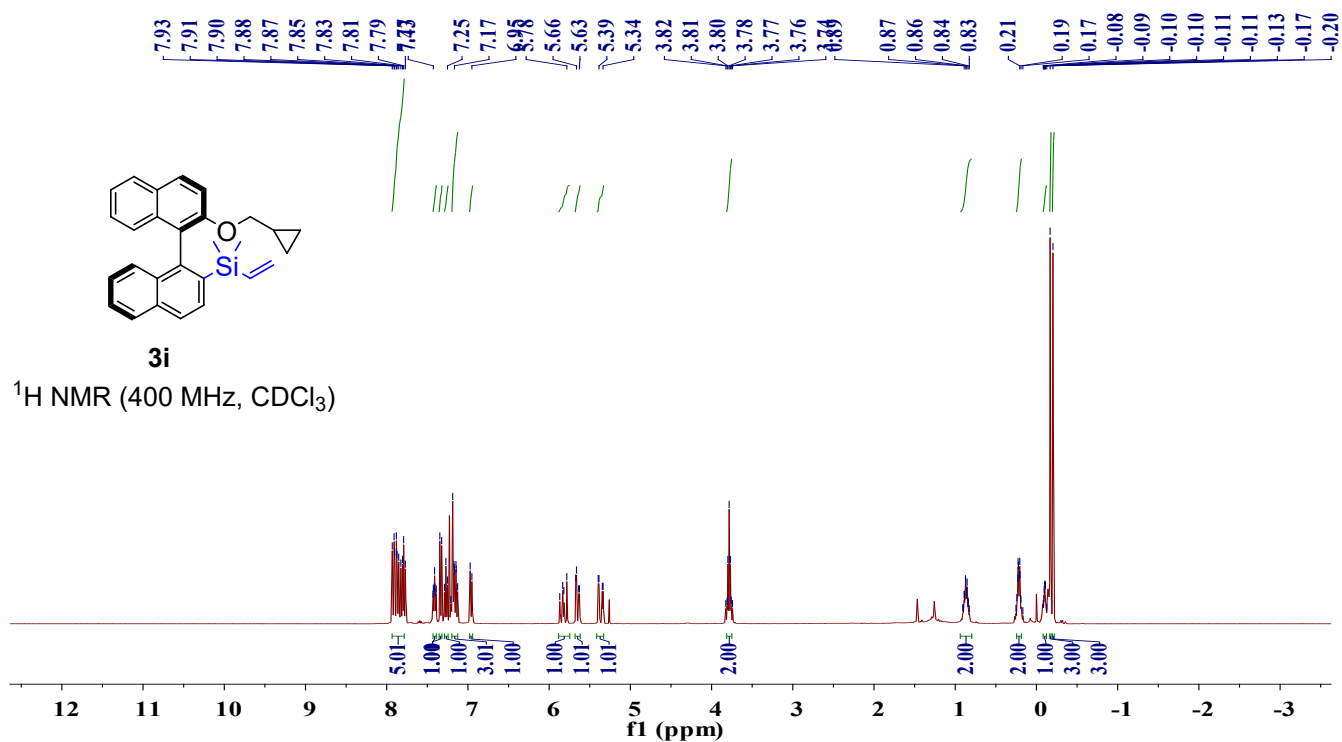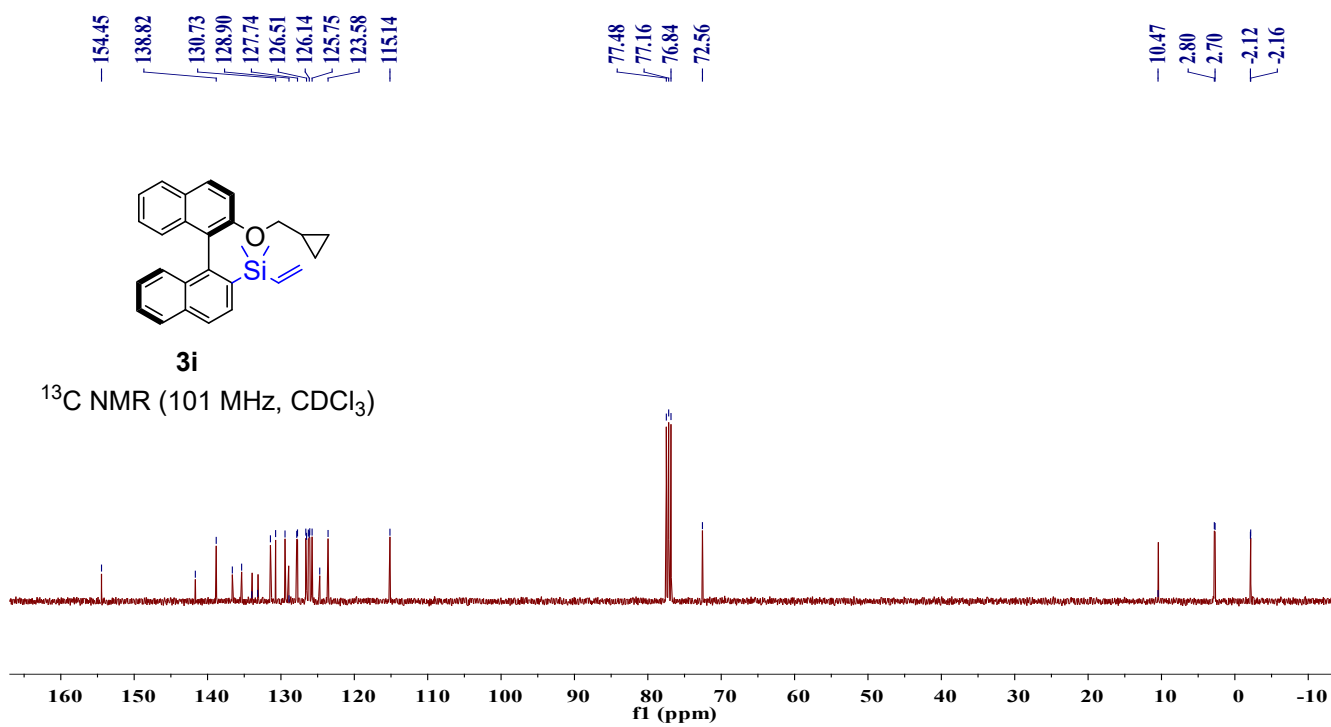

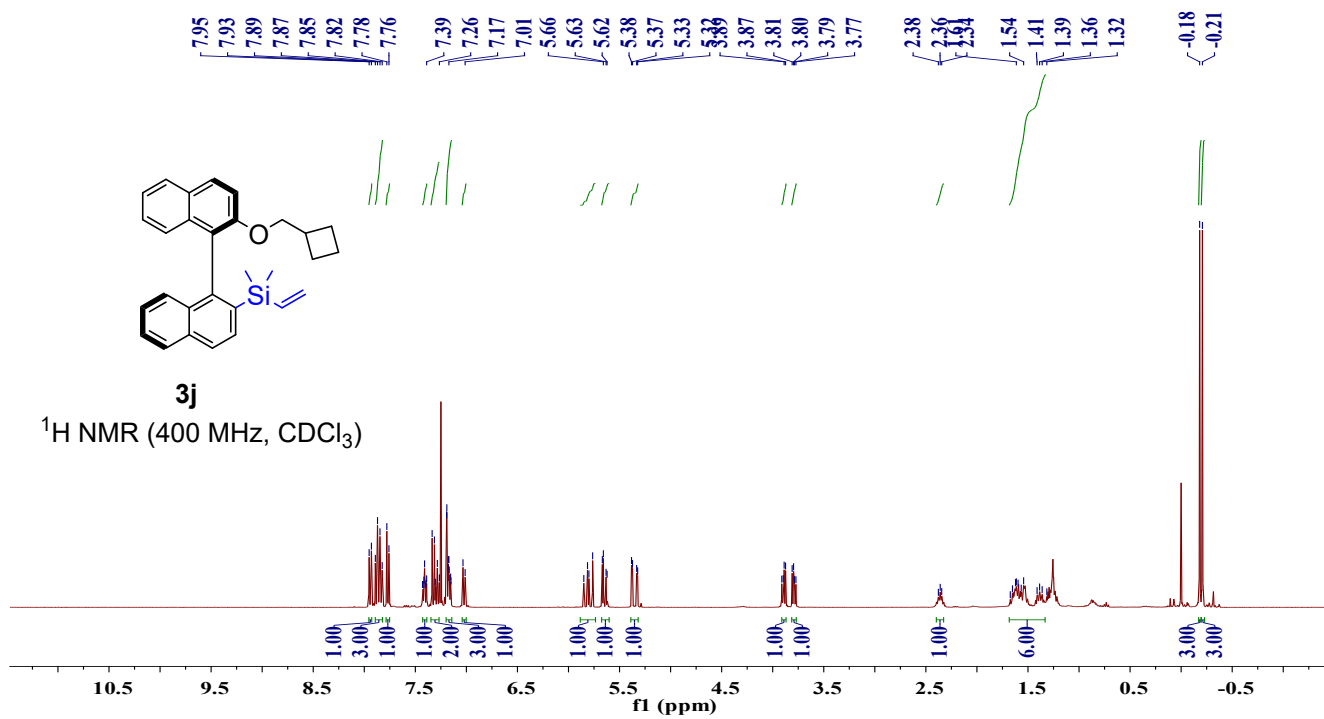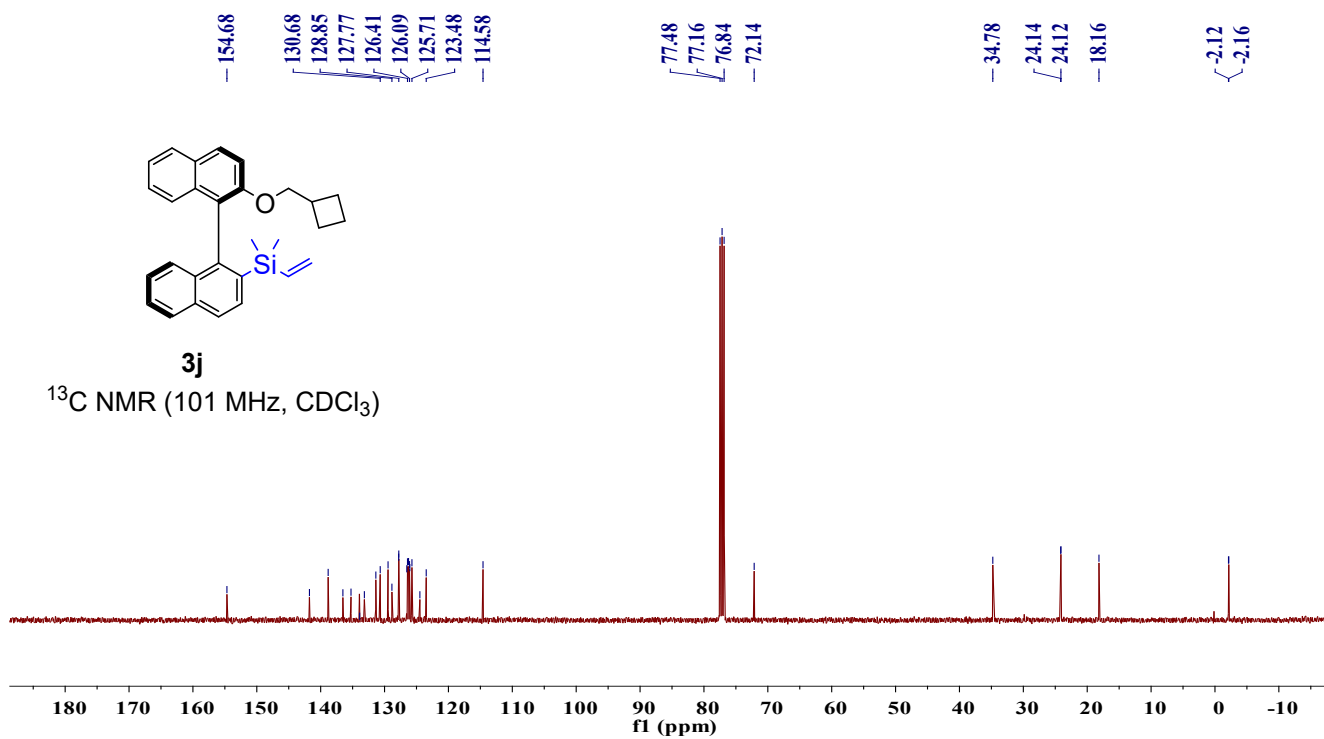

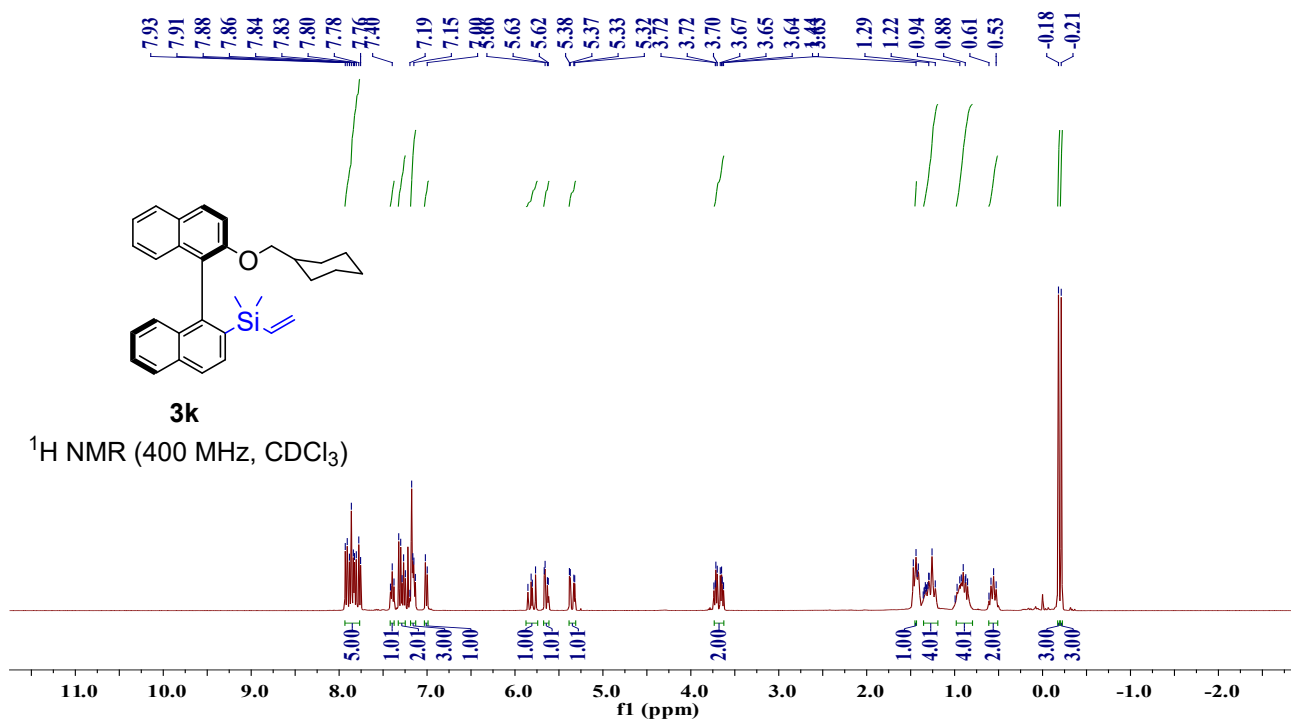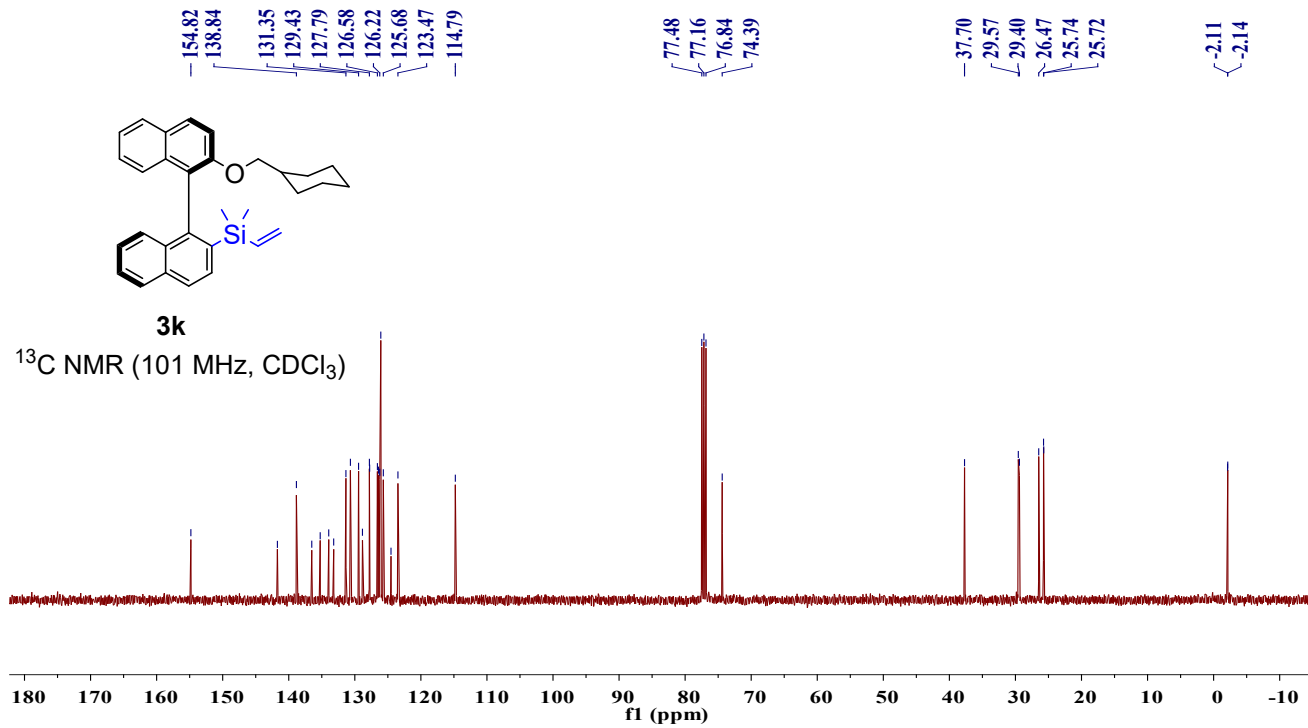

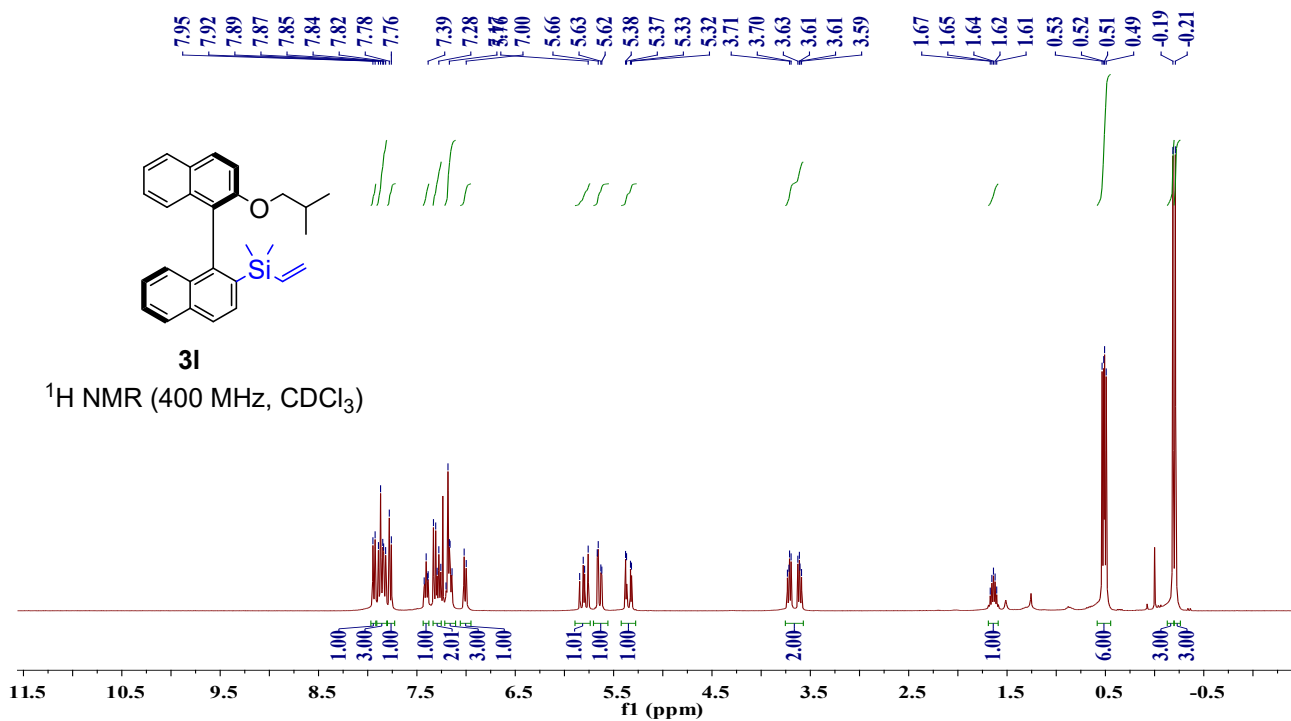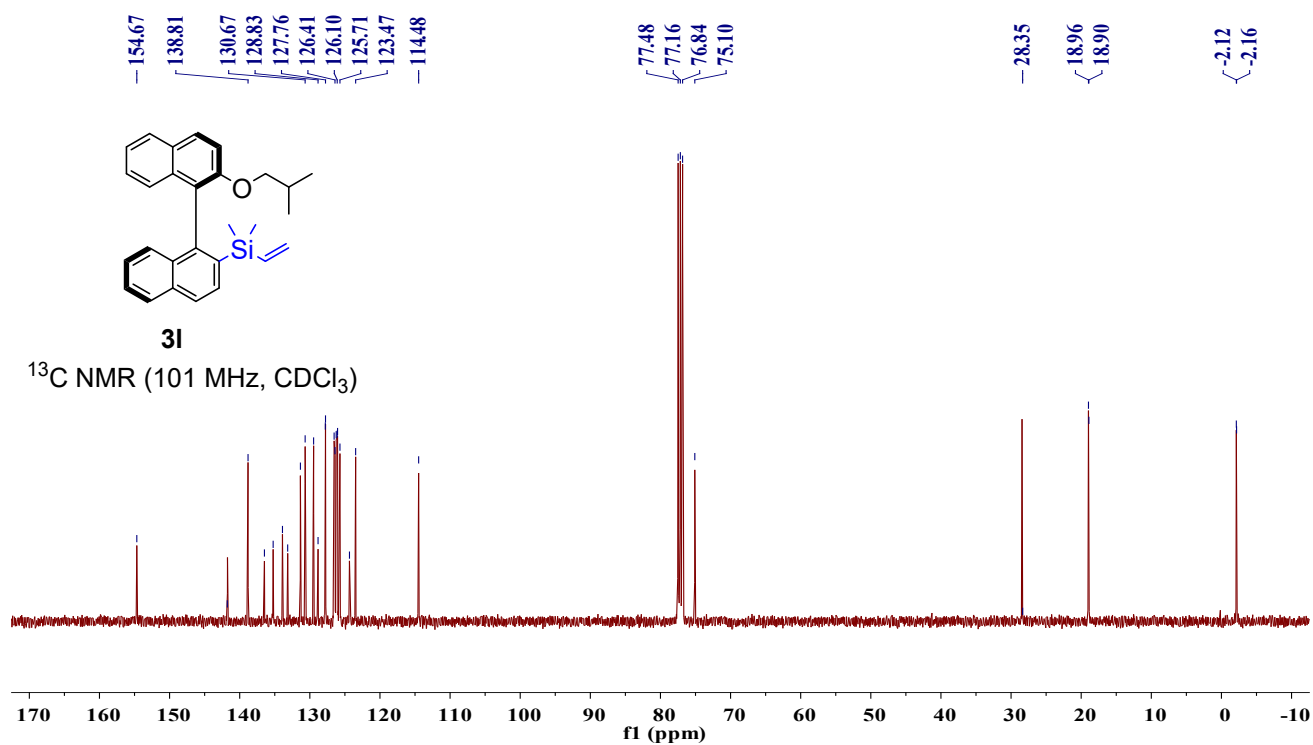

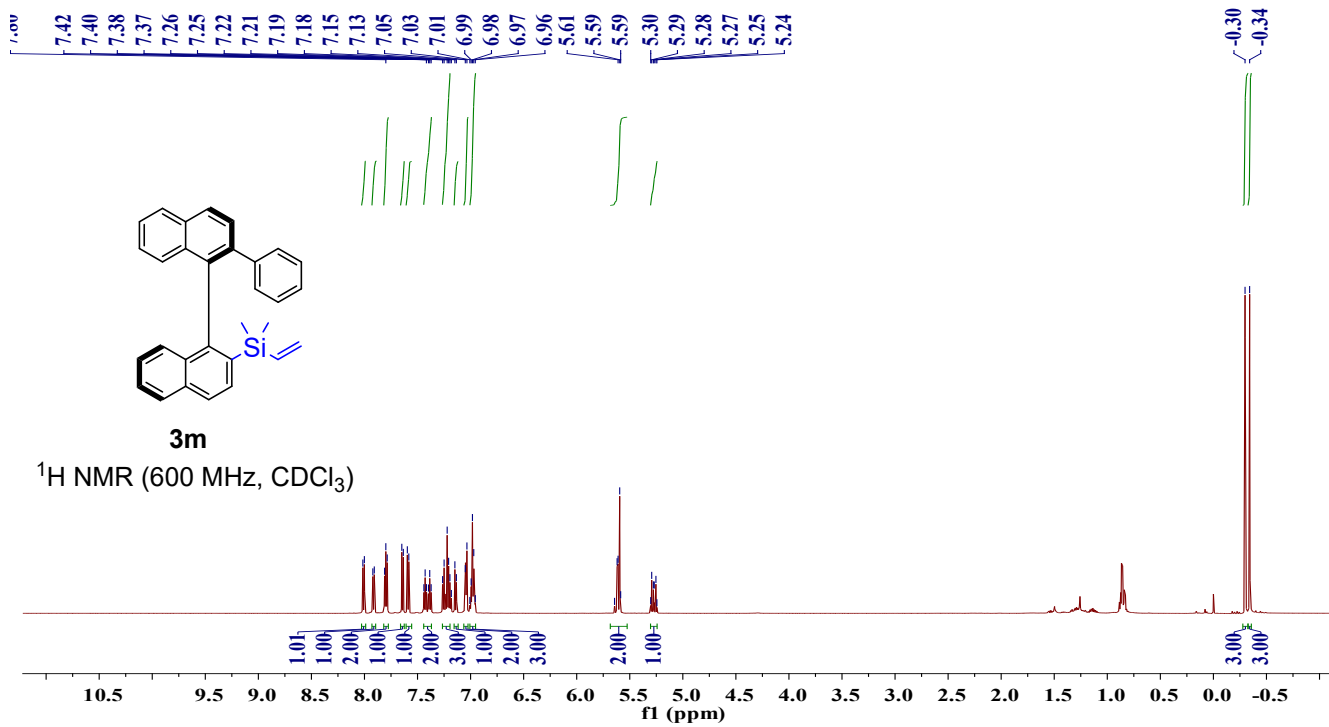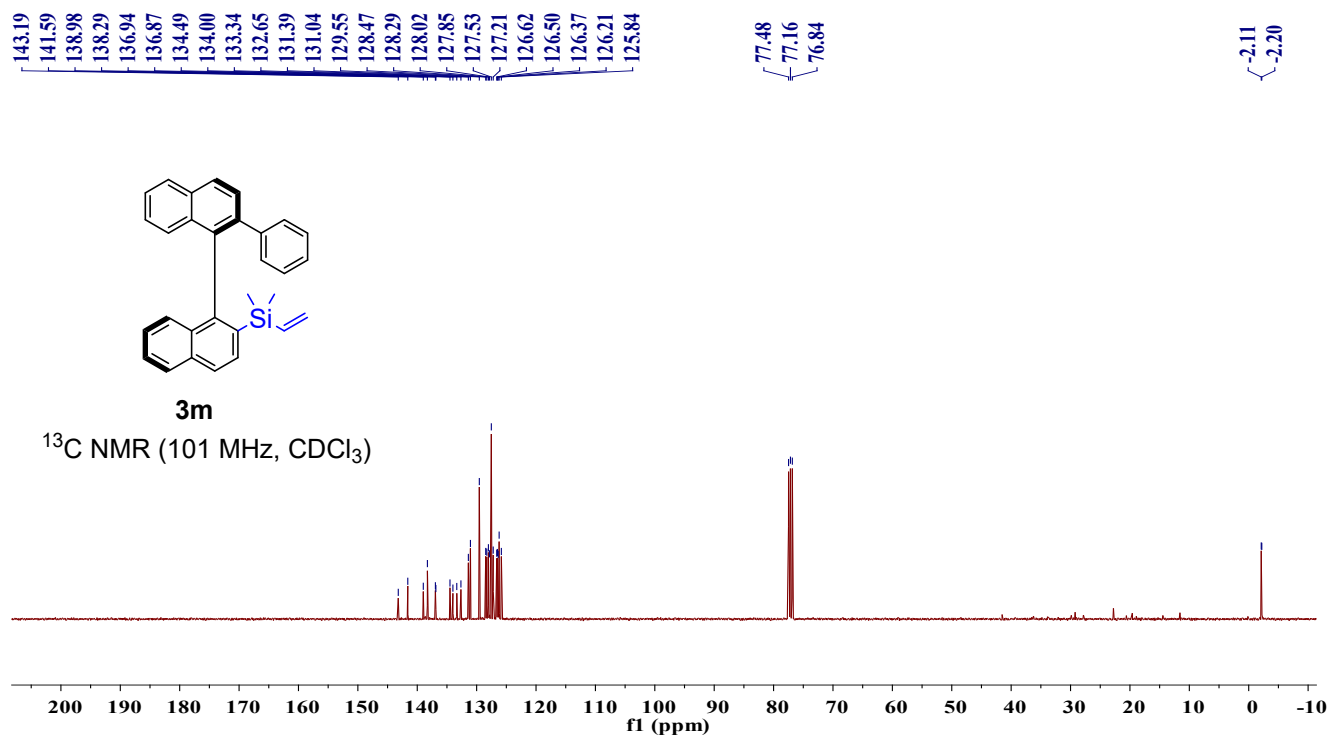

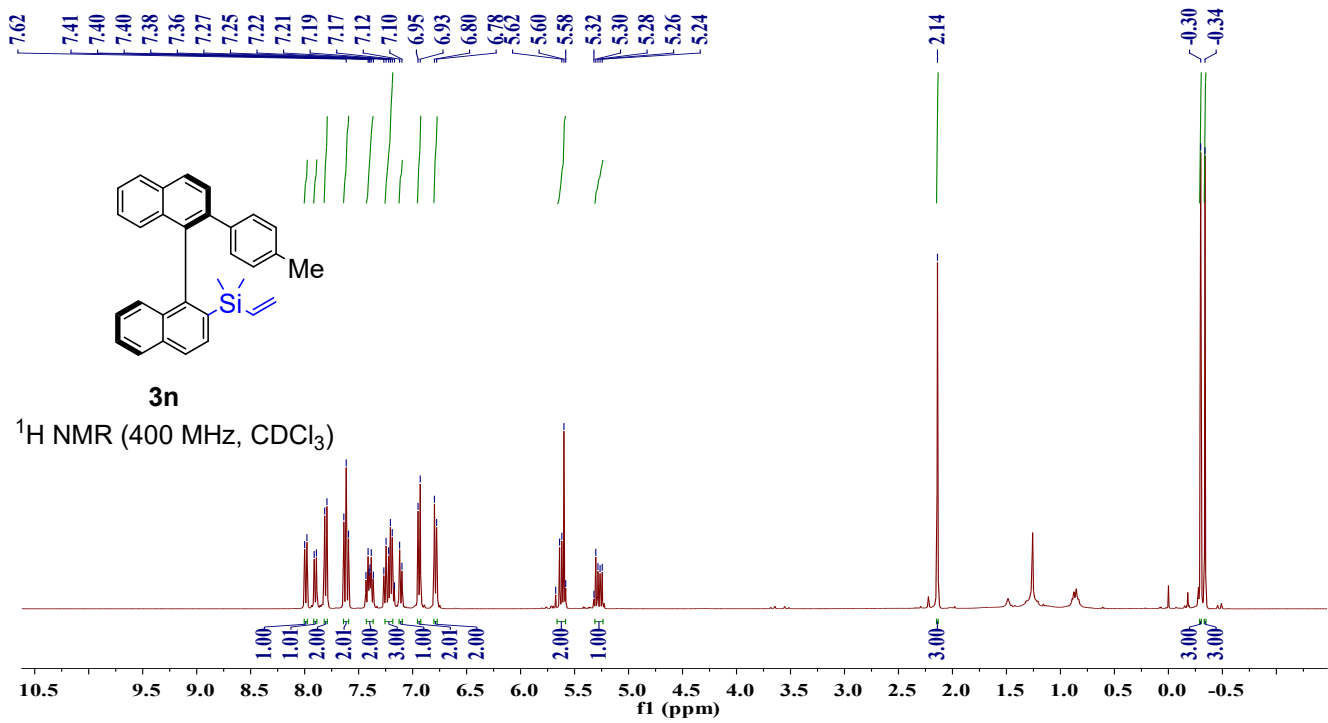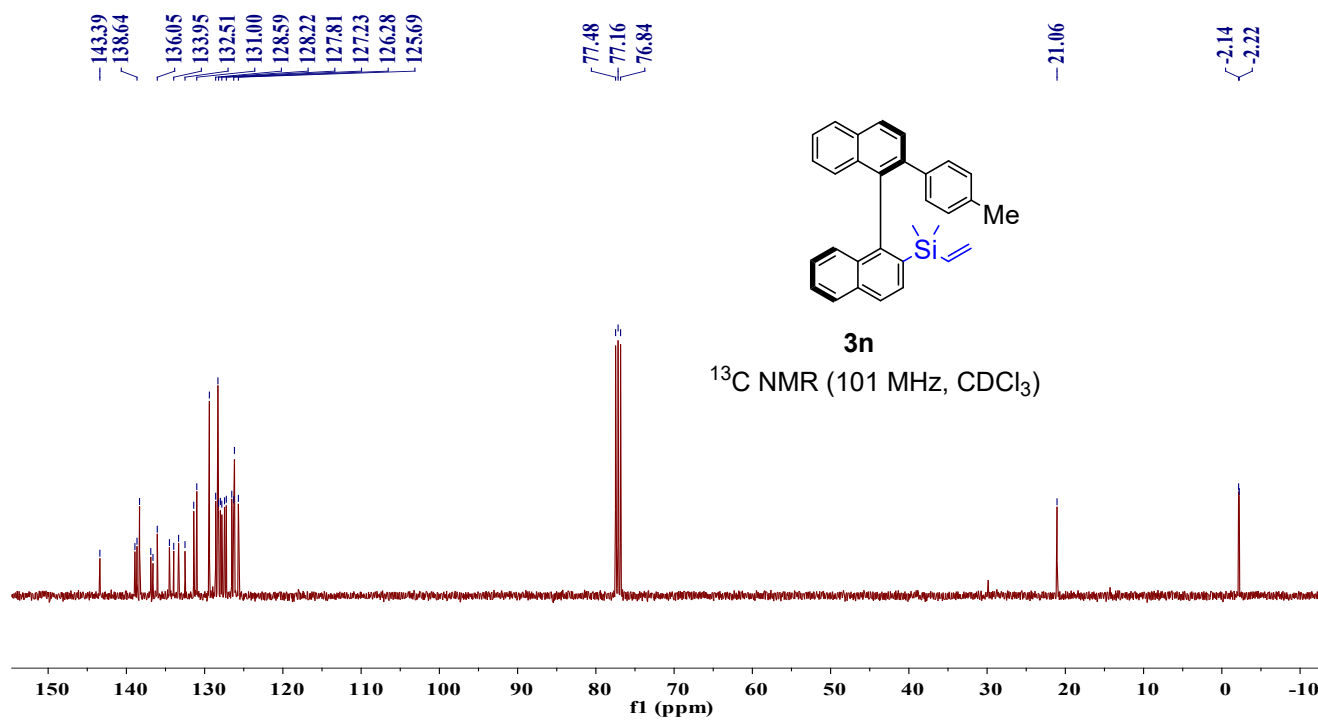

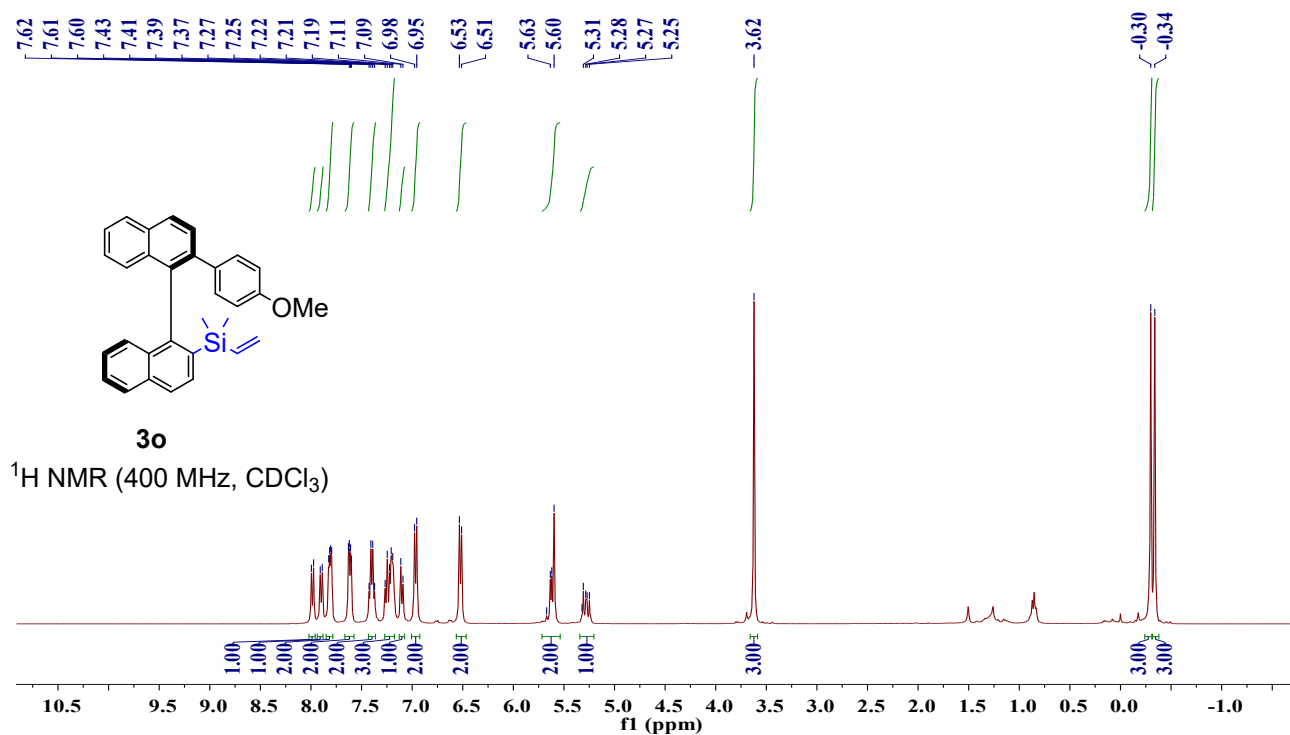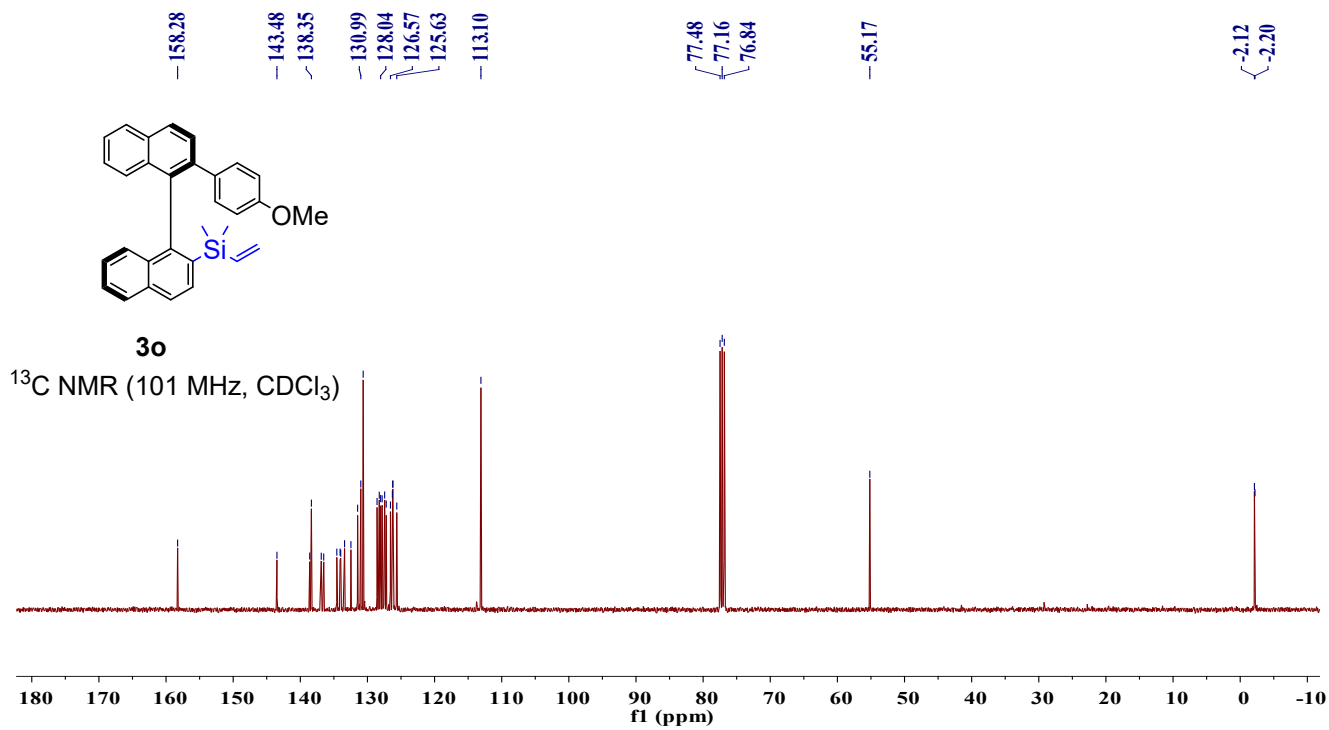



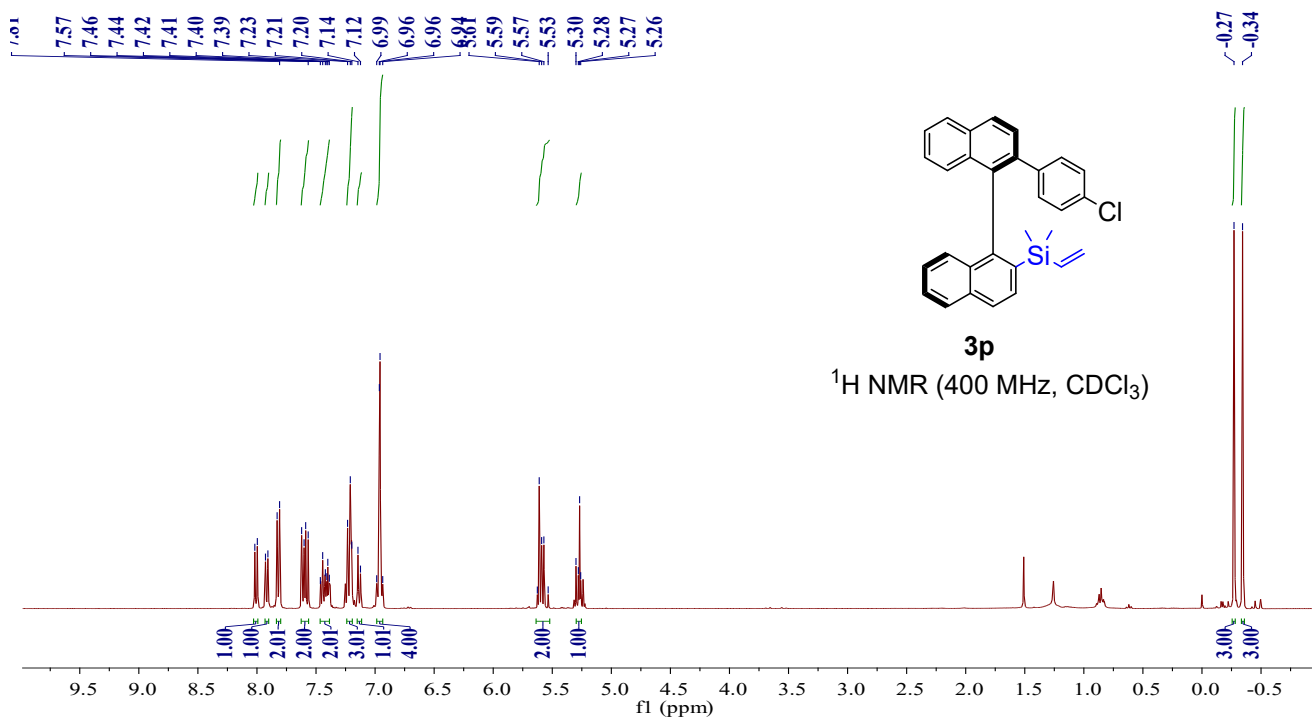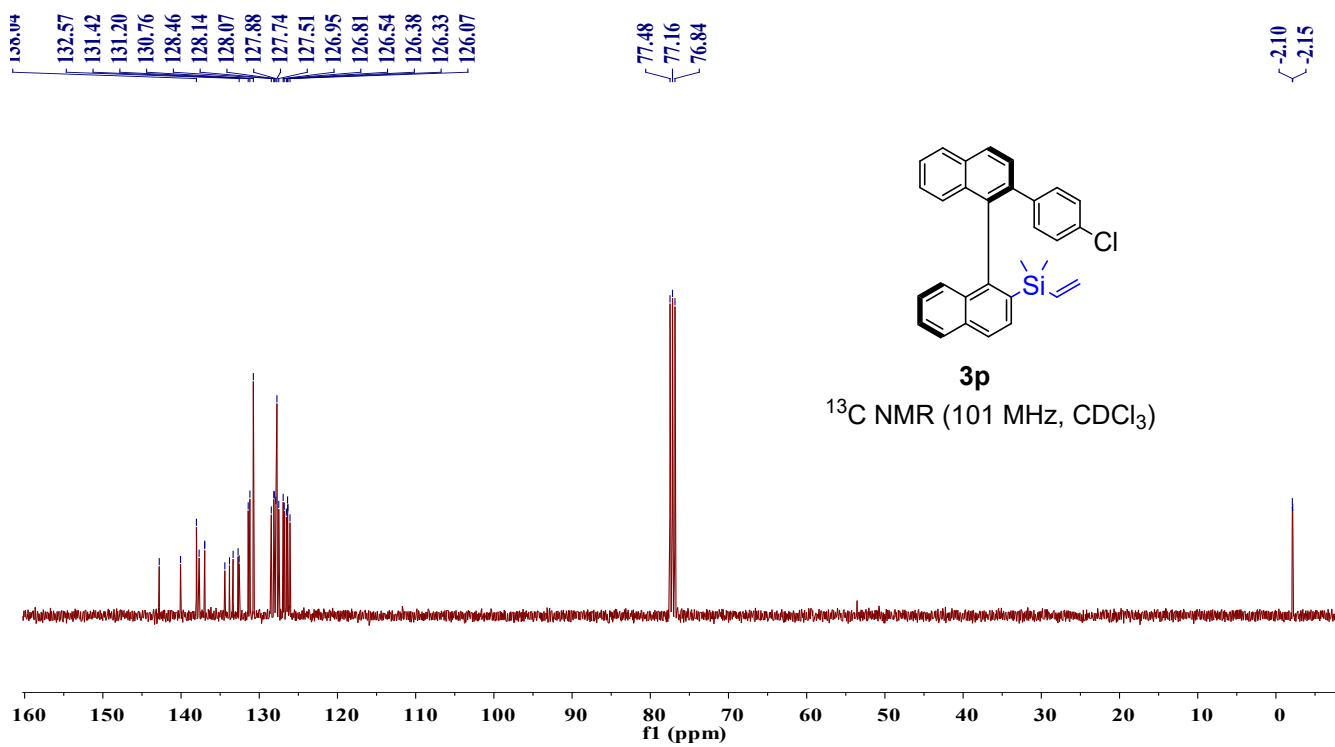

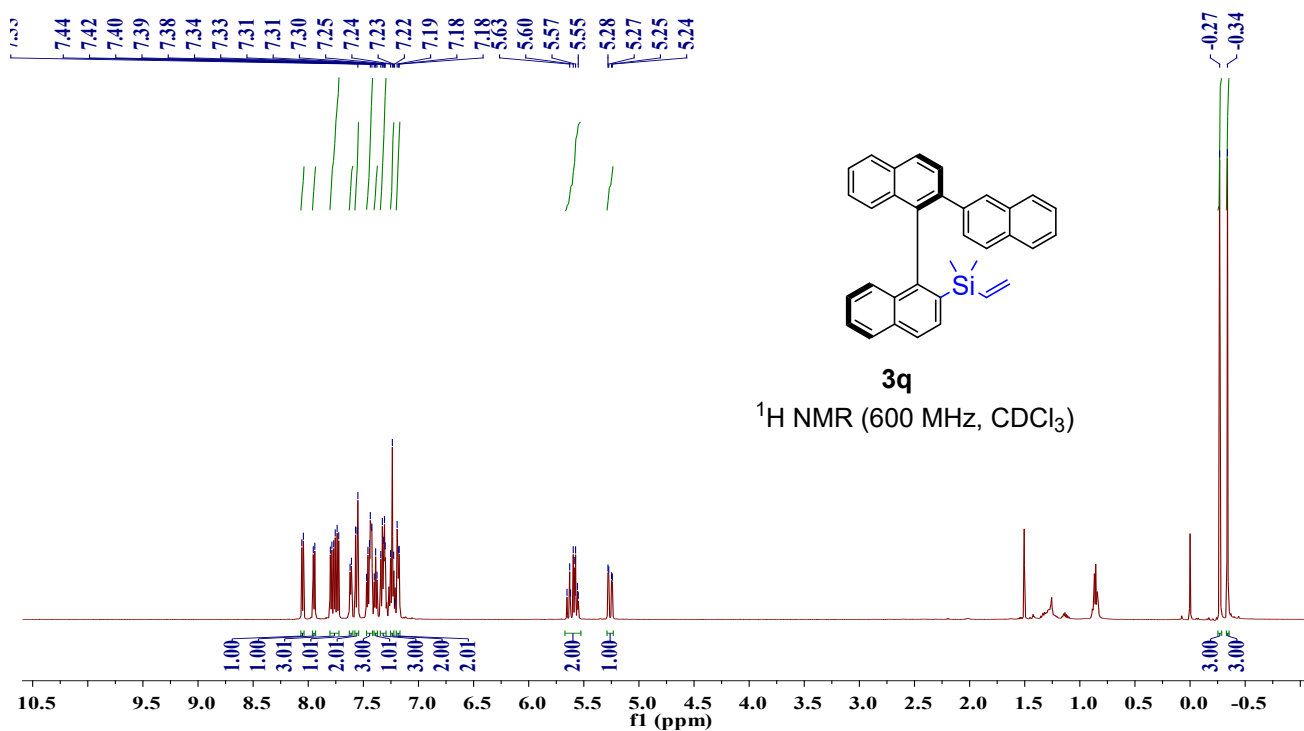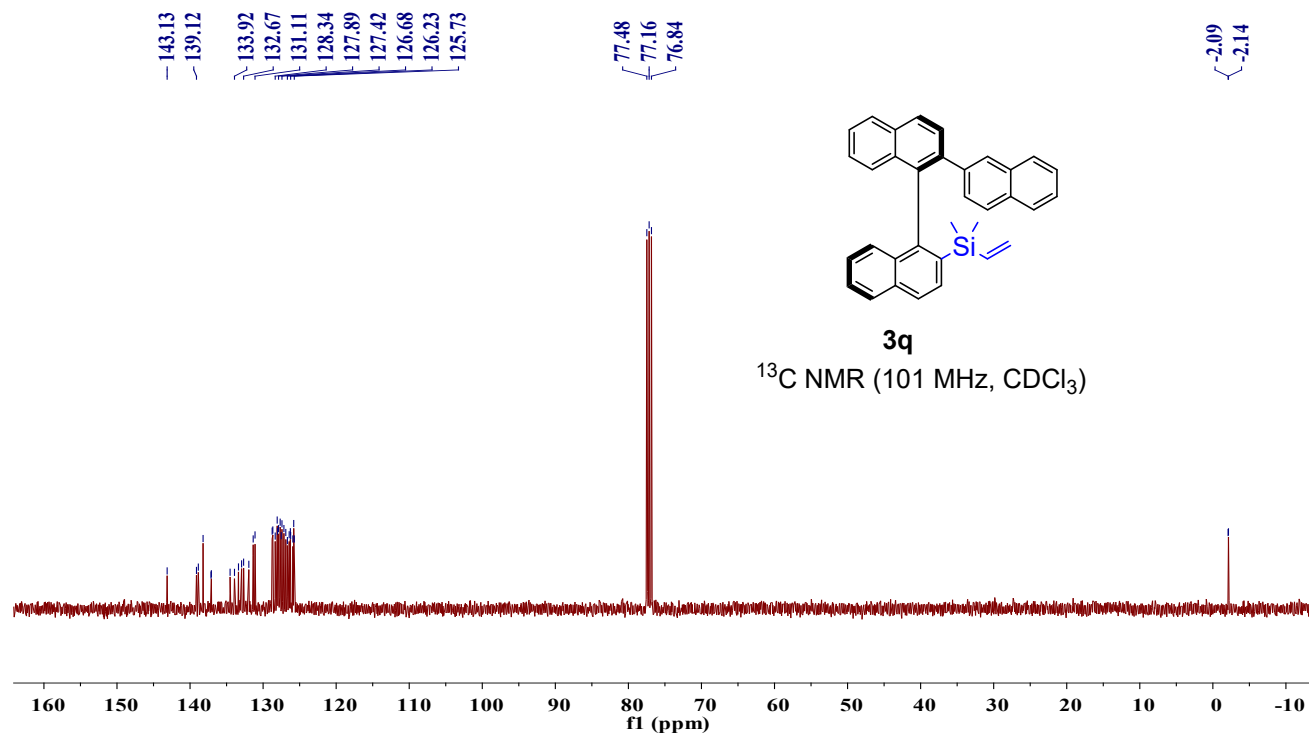

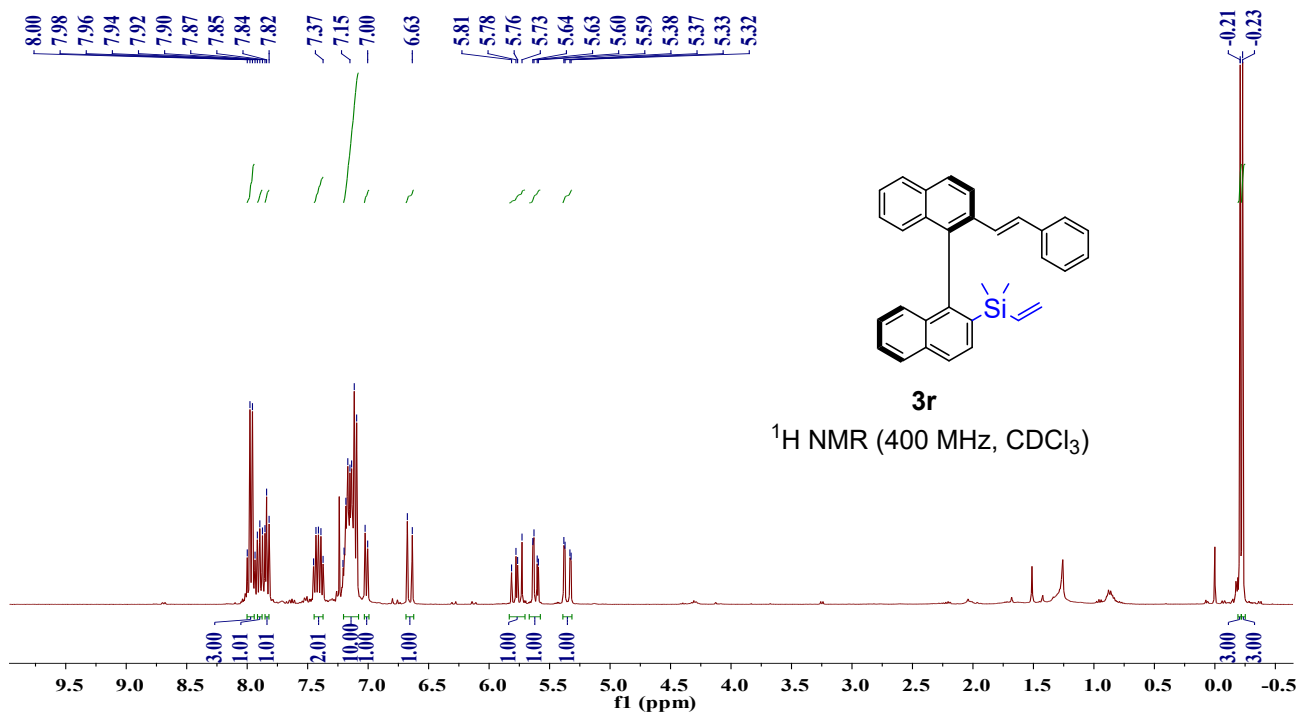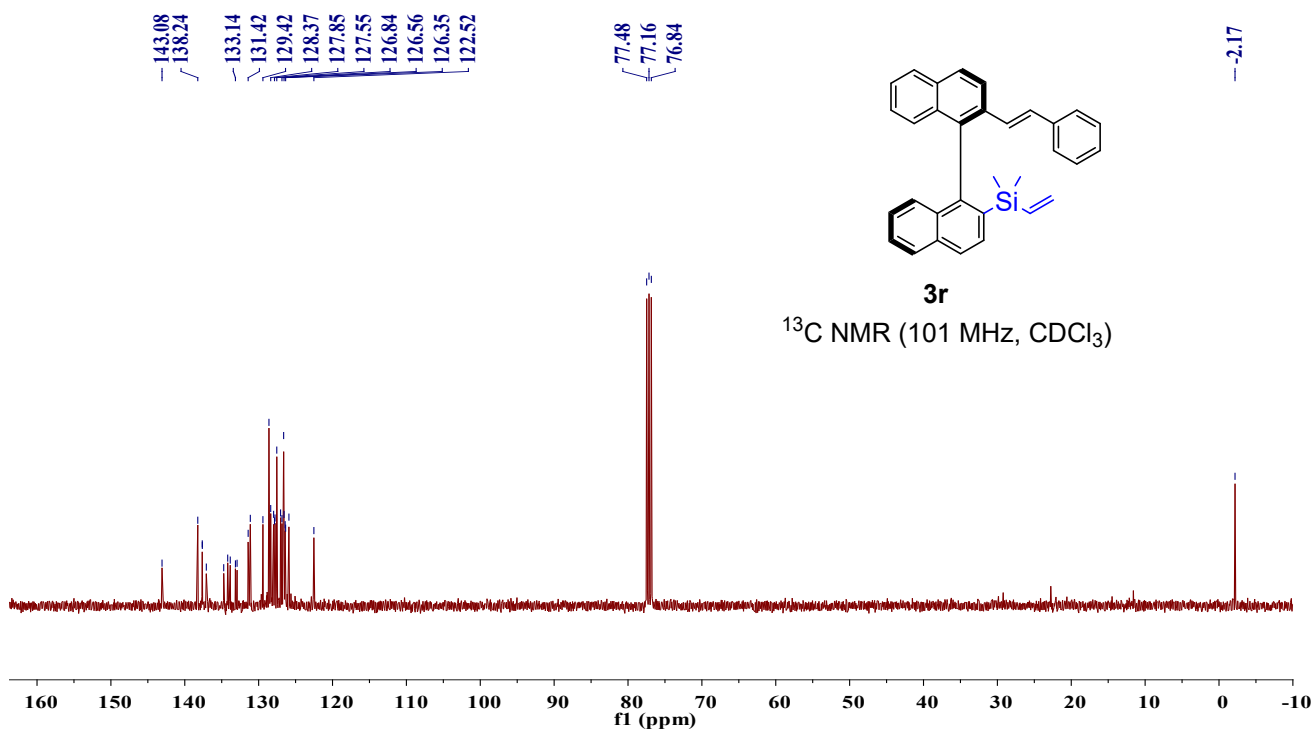

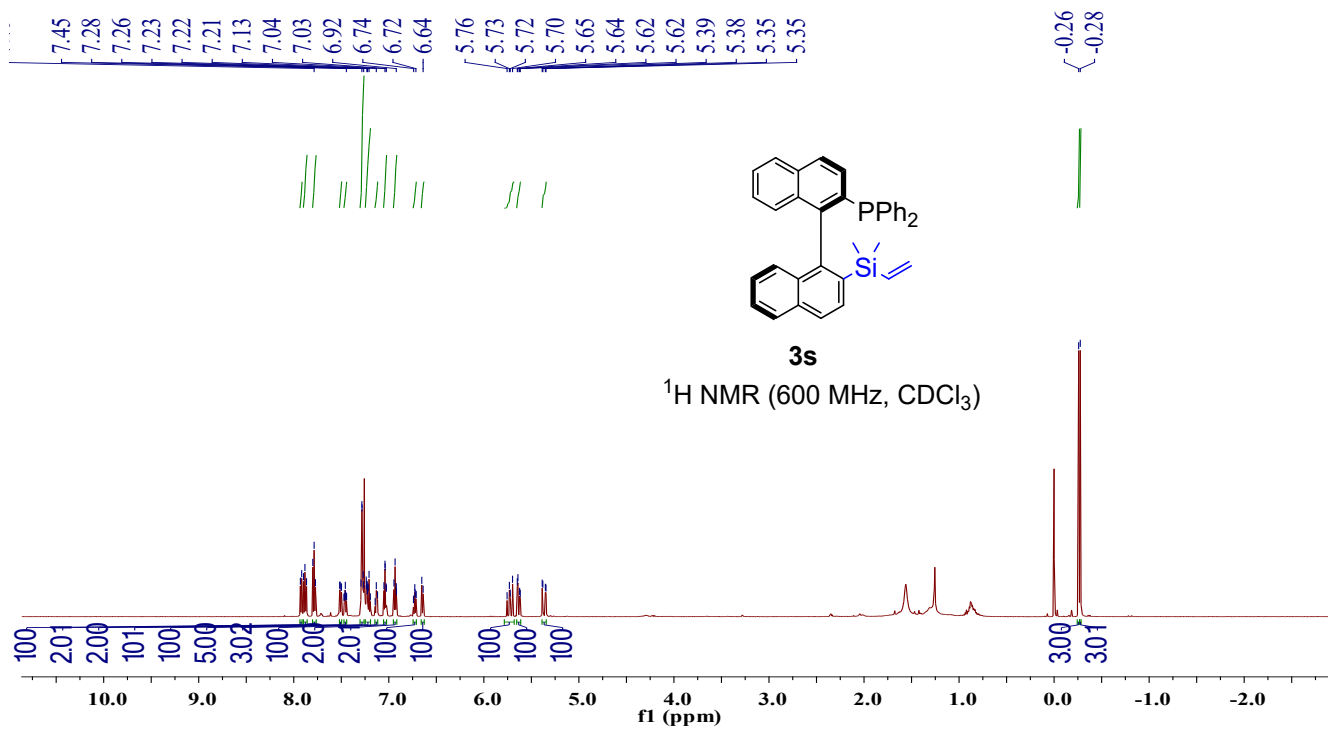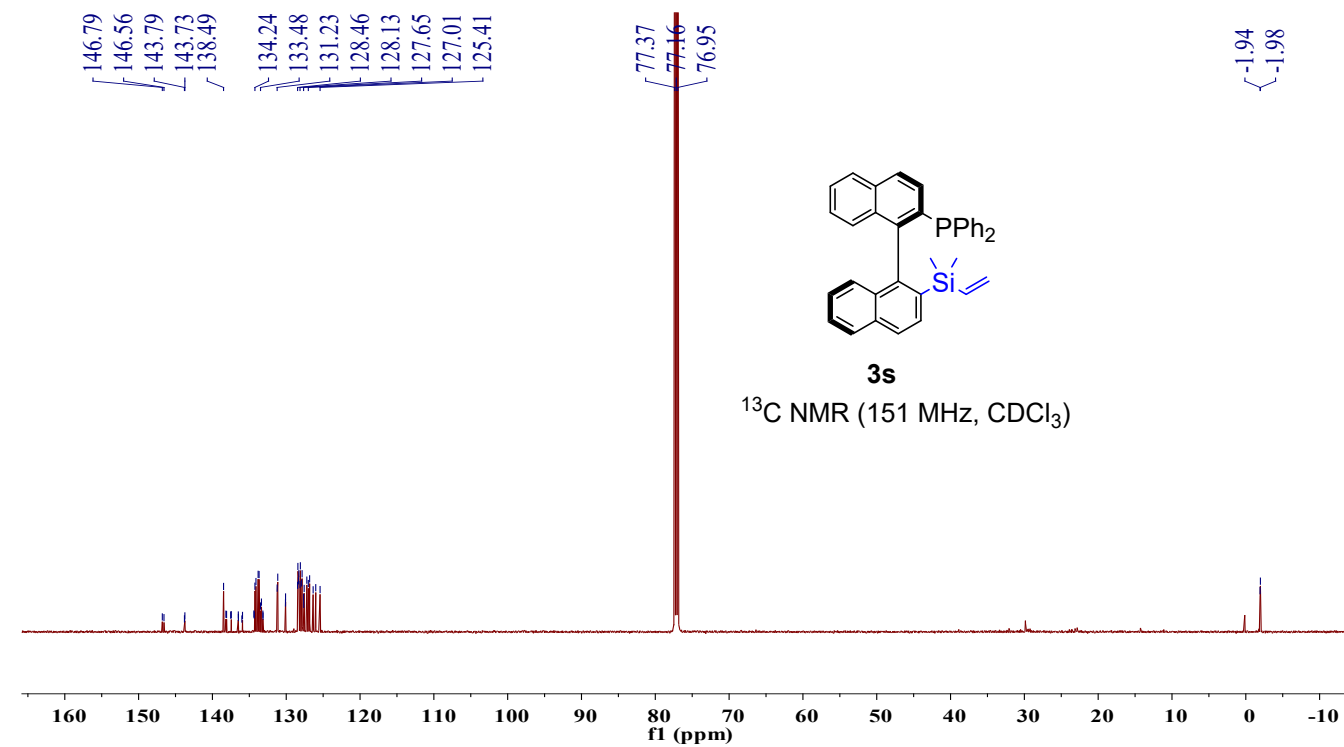

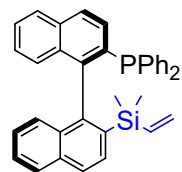

**3s**

$^{31}\text{P}$  NMR (243 MHz,  $\text{CDCl}_3$ )

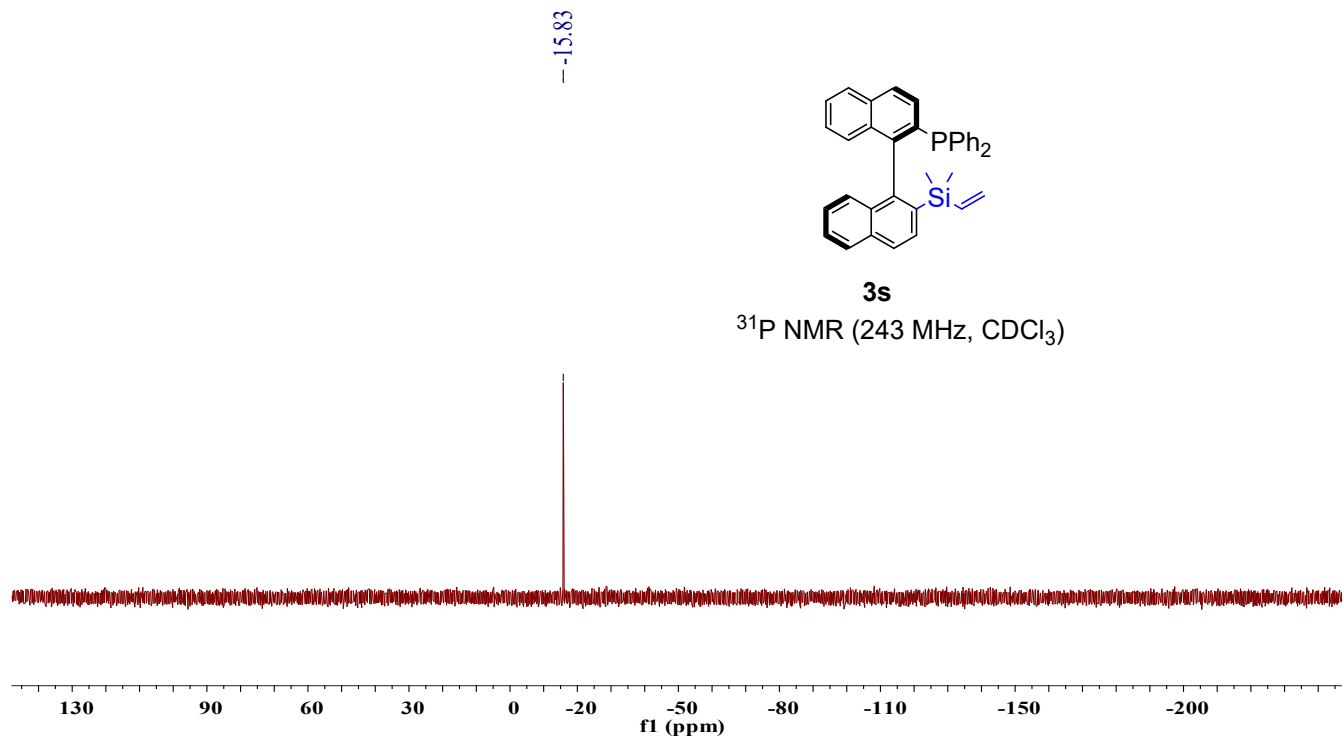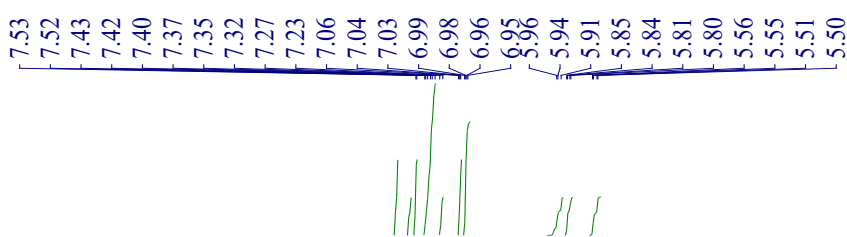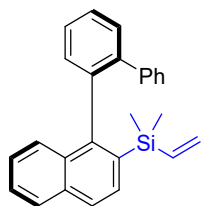

**3t**

$^1\text{H}$  NMR (400 MHz,  $\text{CDCl}_3$ )

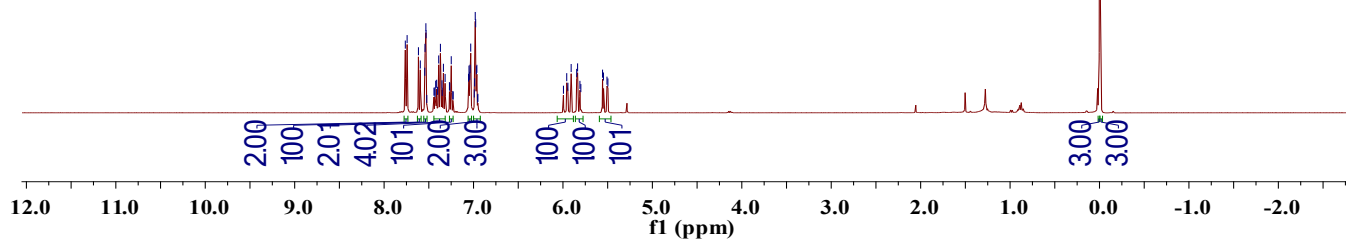

141.77  
141.07  
139.96  
138.90  
135.29  
133.39  
132.73  
132.27  
131.47  
131.09  
130.14  
129.22  
128.34  
127.79  
127.58  
127.04  
126.88  
126.53  
126.44  
126.10  
125.84

{ 77.48  
77.16  
76.84

{ -1.55  
-1.98

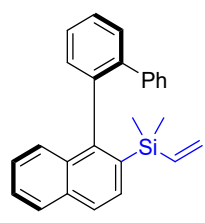

**3t**  
<sup>13</sup>C NMR (101 MHz, CDCl<sub>3</sub>)

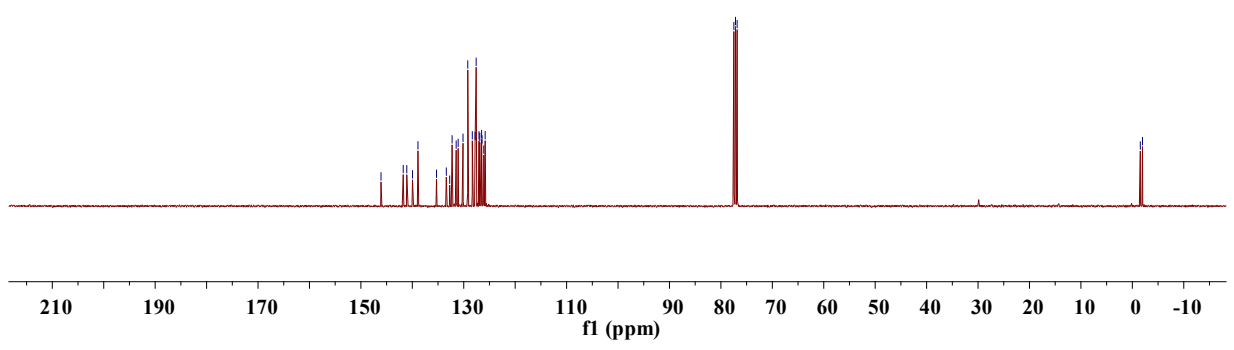

7.37  
7.36  
7.35  
7.33  
7.33  
7.29  
7.27  
7.26  
7.24  
7.22  
7.20  
7.18  
7.16  
7.14  
7.12  
5.52  
5.51  
5.49  
5.47  
5.28  
5.25  
5.20  
5.17  
5.16  
5.12

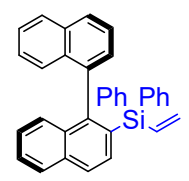

**3v**  
<sup>1</sup>H NMR (400 MHz, CDCl<sub>3</sub>)

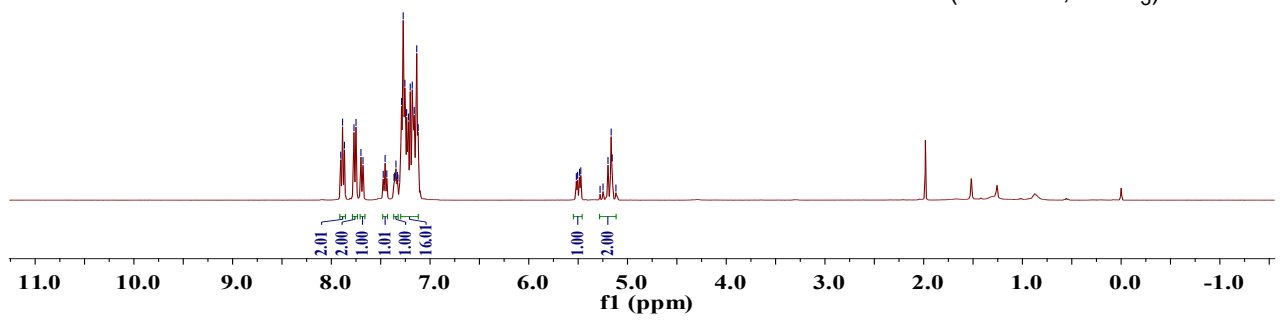

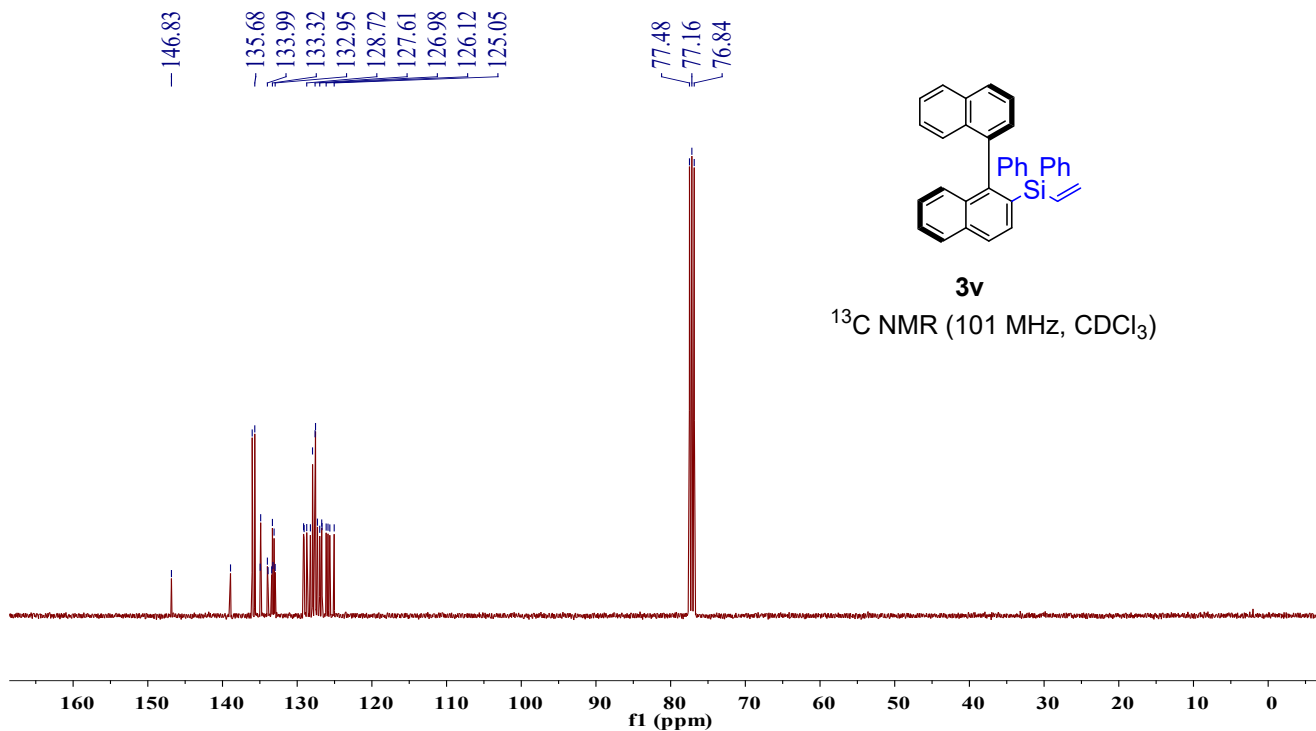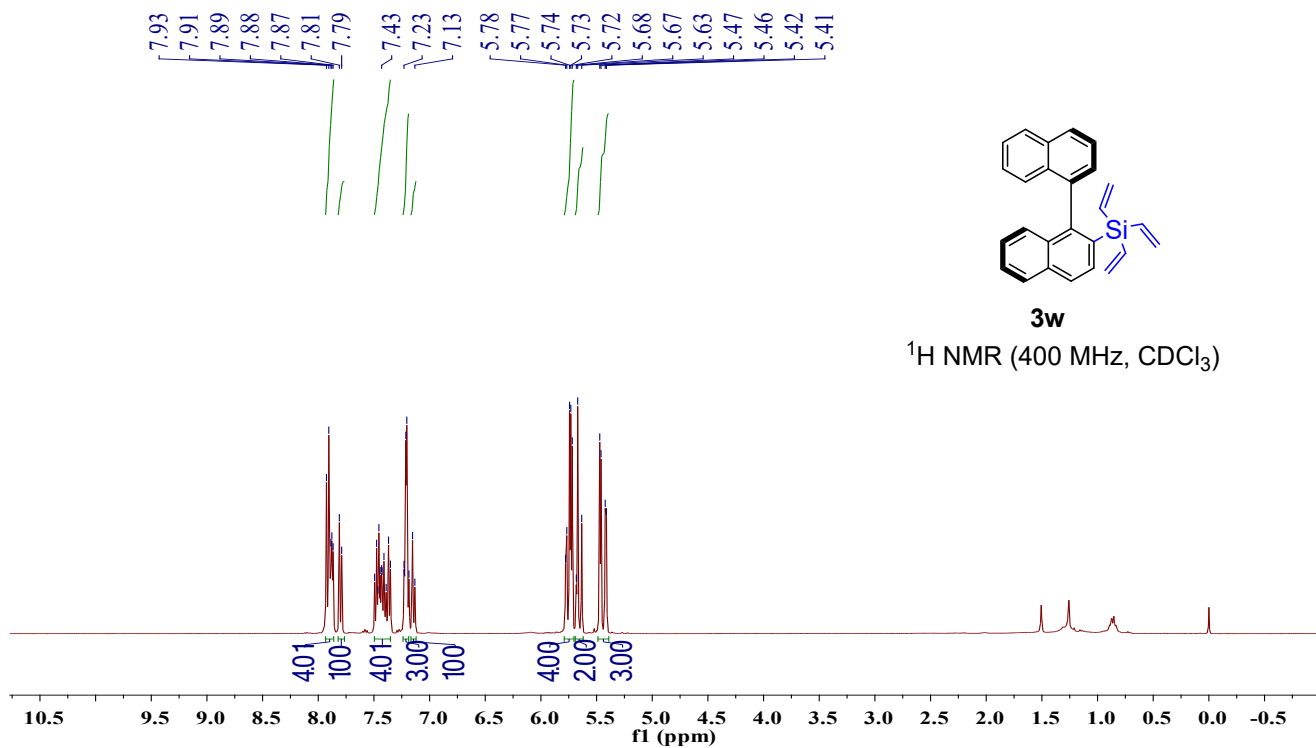

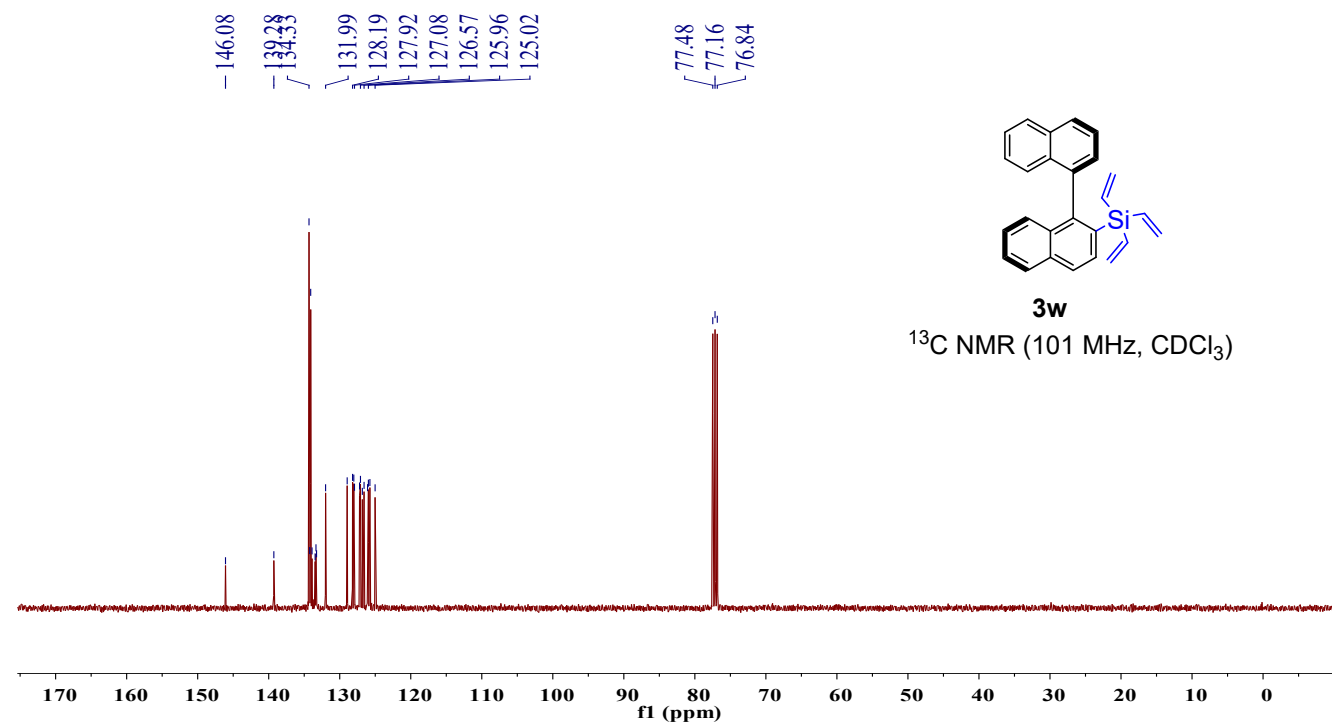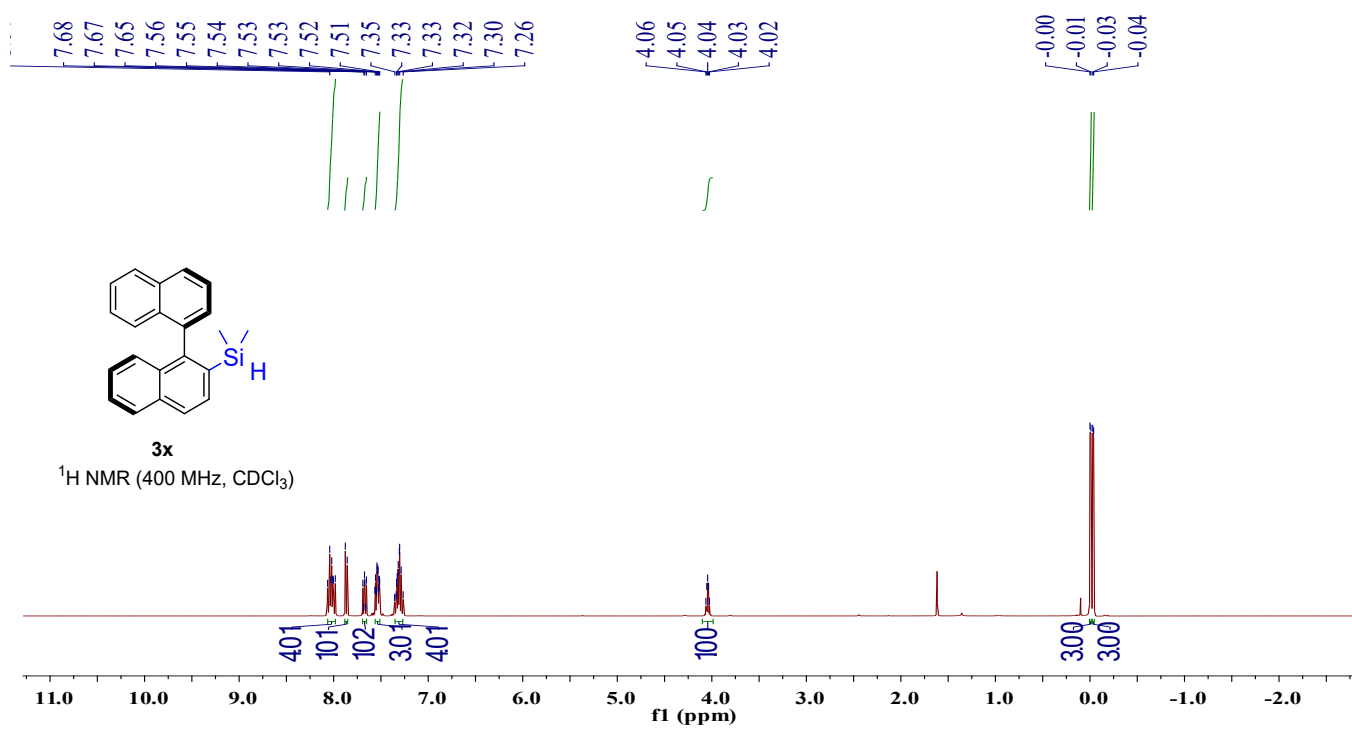



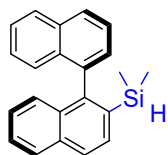

**3x**

$^{13}\text{C}$  NMR (101 MHz,  $\text{CDCl}_3$ )

145.56  
133.89  
128.56  
128.18  
127.02  
126.88  
126.14  
125.24

77.48  
77.16  
76.84

-2.86  
-3.01

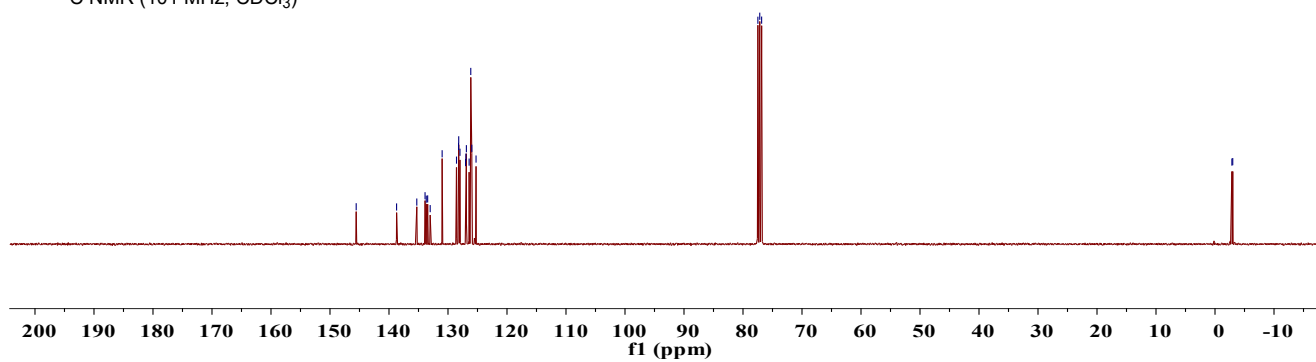

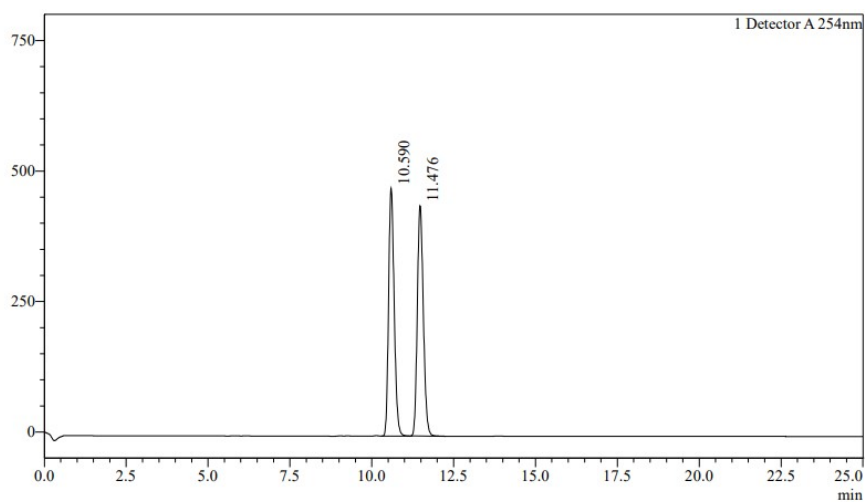

<Peak Table>

Detector A 254nm

| Peak# | Ret. Time | Area     | Height | Conc.  | Area%   |
|-------|-----------|----------|--------|--------|---------|
| 1     | 10.590    | 5637089  | 474701 | 50.008 | 50.008  |
| 2     | 11.476    | 5635228  | 440878 | 49.992 | 49.992  |
| Total |           | 11272317 | 915580 |        | 100.000 |

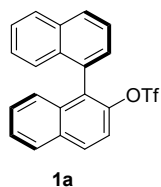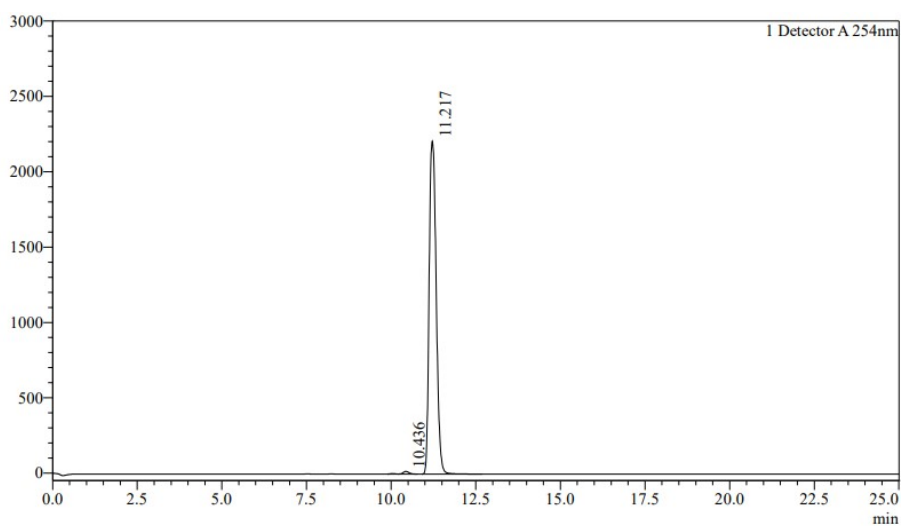

<Peak Table>

Detector A 254nm

| Peak# | Ret. Time | Area     | Height  | Conc.  | Area%   |
|-------|-----------|----------|---------|--------|---------|
| 1     | 10.436    | 231035   | 17412   | 0.719  | 0.719   |
| 2     | 11.217    | 31923901 | 2209612 | 99.281 | 99.281  |
| Total |           | 32154937 | 2227024 |        | 100.000 |

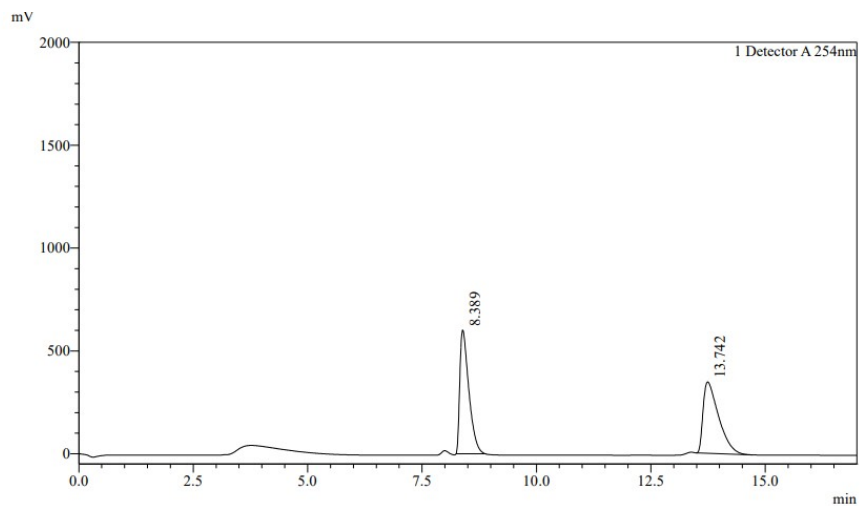

<Peak Table>

| Detector A 254nm |           |          |        |        |         |
|------------------|-----------|----------|--------|--------|---------|
| Peak#            | Ret. Time | Area     | Height | Conc.  | Area%   |
| 1                | 8.389     | 8251641  | 601208 | 50.199 | 50.199  |
| 2                | 13.742    | 8186282  | 347278 | 49.801 | 49.801  |
| Total            |           | 16437924 | 948486 |        | 100.000 |

<Chromatogram>

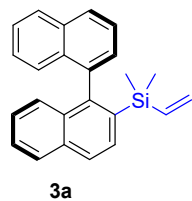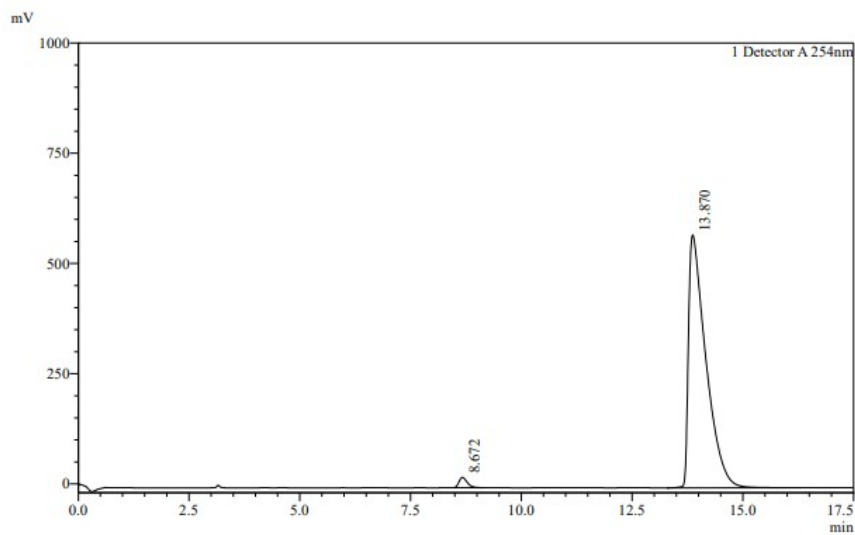

<Peak Table>

| Detector A 254nm |           |          |        |        |         |
|------------------|-----------|----------|--------|--------|---------|
| Peak#            | Ret. Time | Area     | Height | Conc.  | Area%   |
| 1                | 8.672     | 297418   | 23239  | 1.864  | 1.864   |
| 2                | 13.870    | 15658340 | 573361 | 98.136 | 98.136  |
| Total            |           | 15955758 | 596600 |        | 100.000 |

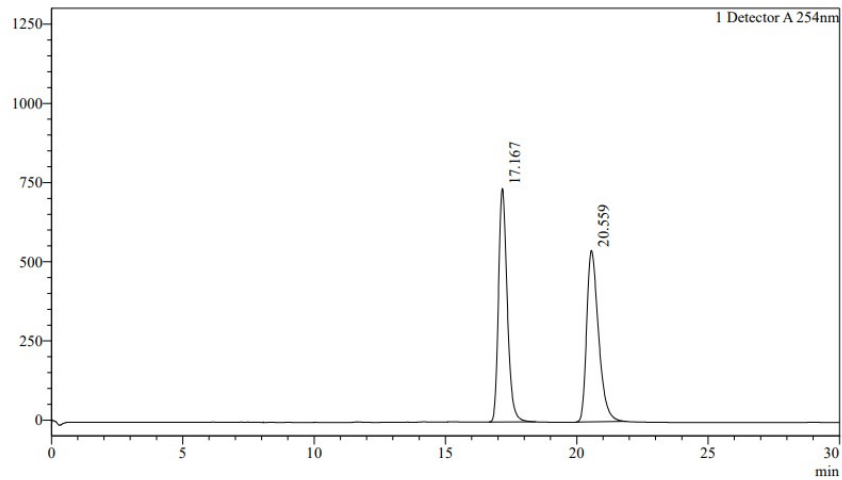

<Peak Table>

| Detector A 254nm |           |          |         |        |         |
|------------------|-----------|----------|---------|--------|---------|
| Peak#            | Ret. Time | Area     | Height  | Conc.  | Area%   |
| 1                | 17.167    | 17008258 | 736791  | 50.051 | 50.051  |
| 2                | 20.559    | 16973509 | 540945  | 49.949 | 49.949  |
| Total            |           | 33981767 | 1277736 |        | 100.000 |

<Chromatogram>

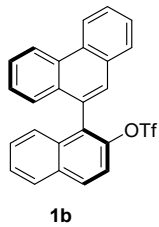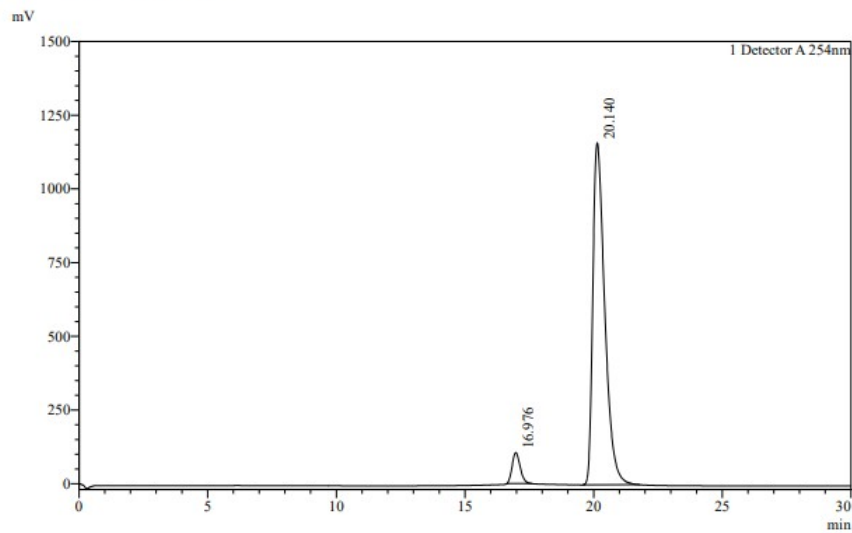

<Peak Table>

| Detector A 254nm |           |          |         |        |         |
|------------------|-----------|----------|---------|--------|---------|
| Peak#            | Ret. Time | Area     | Height  | Conc.  | Area%   |
| 1                | 16.976    | 2257219  | 104321  | 5.688  | 5.688   |
| 2                | 20.140    | 37423623 | 1159767 | 94.312 | 94.312  |
| Total            |           | 39680842 | 1264088 |        | 100.000 |

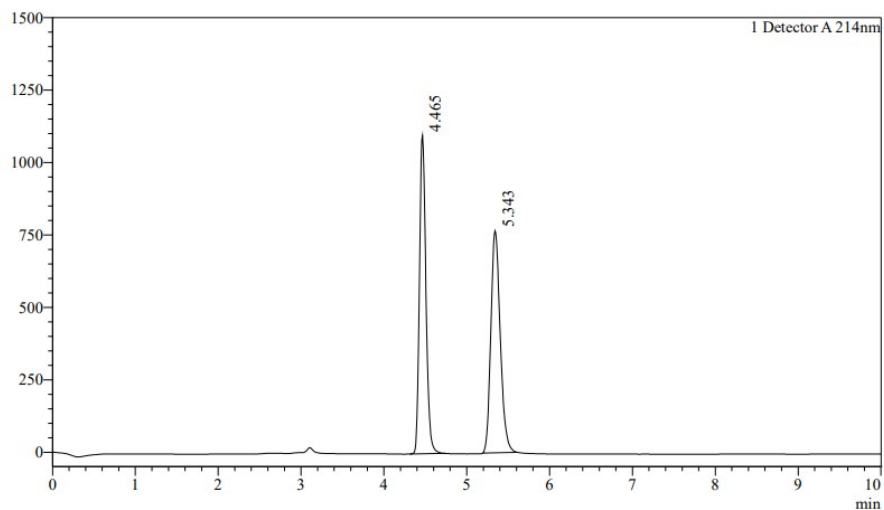

<Peak Table>

| Detector A 214nm |           |          |         |        |         |
|------------------|-----------|----------|---------|--------|---------|
| Peak#            | Ret. Time | Area     | Height  | Conc.  | Area%   |
| 1                | 4.465     | 5962870  | 1099248 | 49.709 | 49.709  |
| 2                | 5.343     | 6032724  | 765972  | 50.291 | 50.291  |
| Total            |           | 11995594 | 1865220 |        | 100.000 |

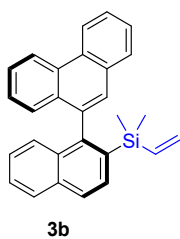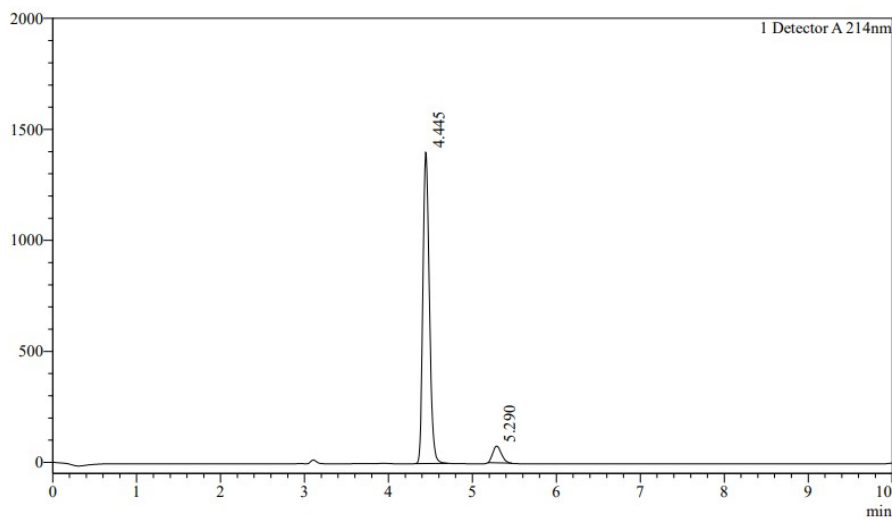

<Peak Table>

| Detector A 214nm |           |         |         |        |         |
|------------------|-----------|---------|---------|--------|---------|
| Peak#            | Ret. Time | Area    | Height  | Conc.  | Area%   |
| 1                | 4.445     | 7525936 | 1401439 | 93.289 | 93.289  |
| 2                | 5.290     | 541390  | 75284   | 6.711  | 6.711   |
| Total            |           | 8067326 | 1476723 |        | 100.000 |

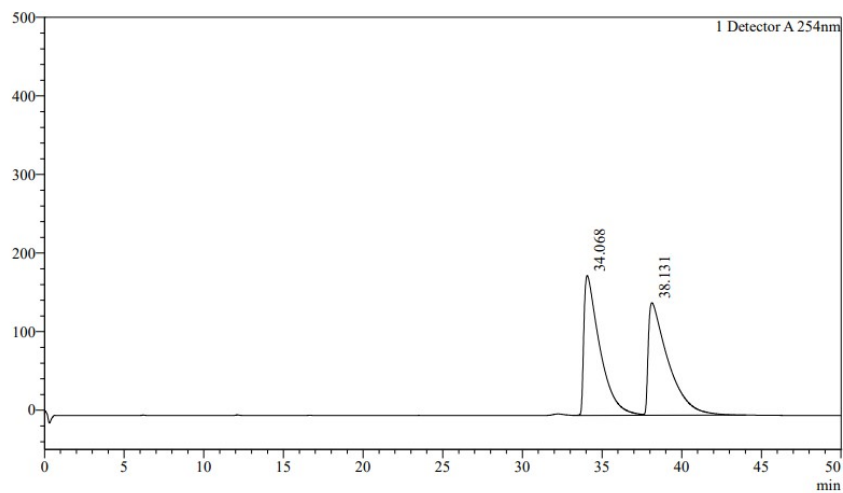

**<Peak Table>**

Detector A 254nm

| Peak# | Ret. Time | Area     | Height | Conc.  | Area%   |
|-------|-----------|----------|--------|--------|---------|
| 1     | 34.068    | 12401867 | 177919 | 49.889 | 49.889  |
| 2     | 38.131    | 12457138 | 143186 | 50.111 | 50.111  |
| Total |           | 24859006 | 321106 |        | 100.000 |

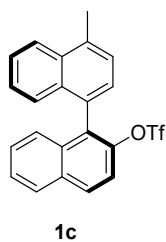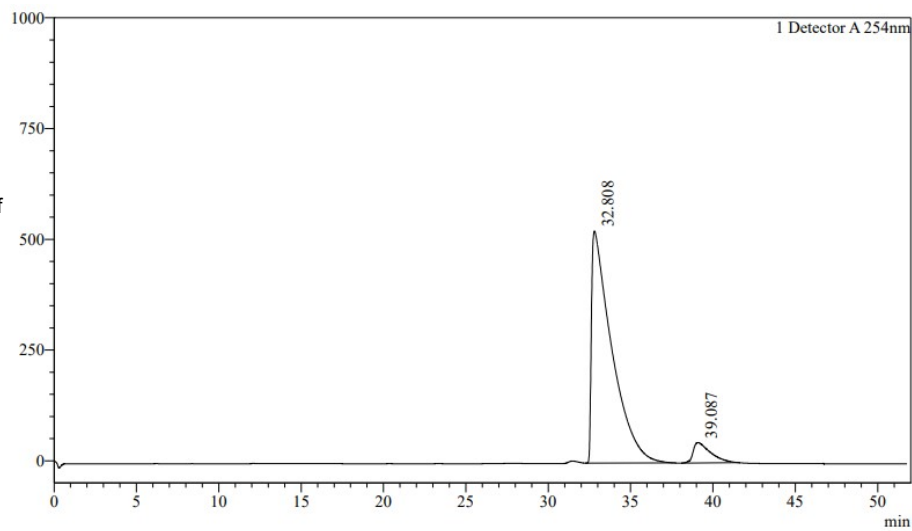

**<Peak Table>**

Detector A 254nm

| Peak# | Ret. Time | Area     | Height | Conc.  | Area%   |
|-------|-----------|----------|--------|--------|---------|
| 1     | 32.808    | 44843884 | 523632 | 92.971 | 92.971  |
| 2     | 39.087    | 3390566  | 46159  | 7.029  | 7.029   |
| Total |           | 48234450 | 569791 |        | 100.000 |

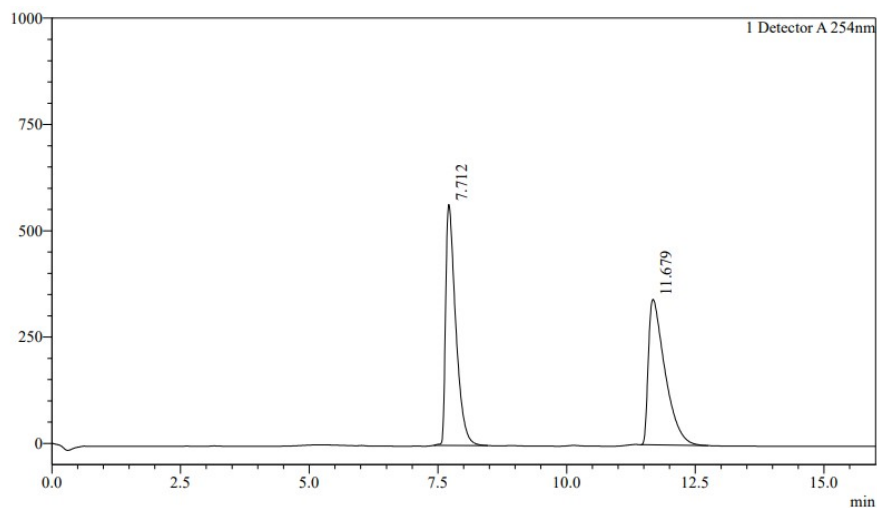

<Peak Table>

Detector A 254nm

| Peak# | Ret. Time | Area     | Height | Conc.  | Area%   |
|-------|-----------|----------|--------|--------|---------|
| 1     | 7.712     | 7727049  | 566085 | 50.120 | 50.120  |
| 2     | 11.679    | 7690175  | 341796 | 49.880 | 49.880  |
| Total |           | 15417224 | 907881 |        | 100.000 |

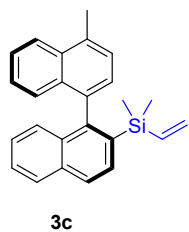

3c

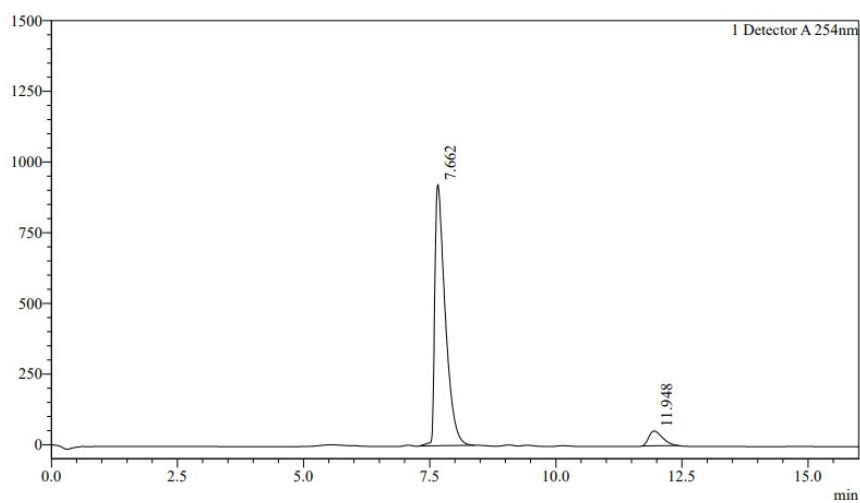

<Peak Table>

Detector A 254nm

| Peak# | Ret. Time | Area     | Height | Conc.  | Area%   |
|-------|-----------|----------|--------|--------|---------|
| 1     | 7.662     | 13365496 | 924156 | 93.036 | 93.036  |
| 2     | 11.948    | 1000431  | 52789  | 6.964  | 6.964   |
| Total |           | 14365927 | 976945 |        | 100.000 |

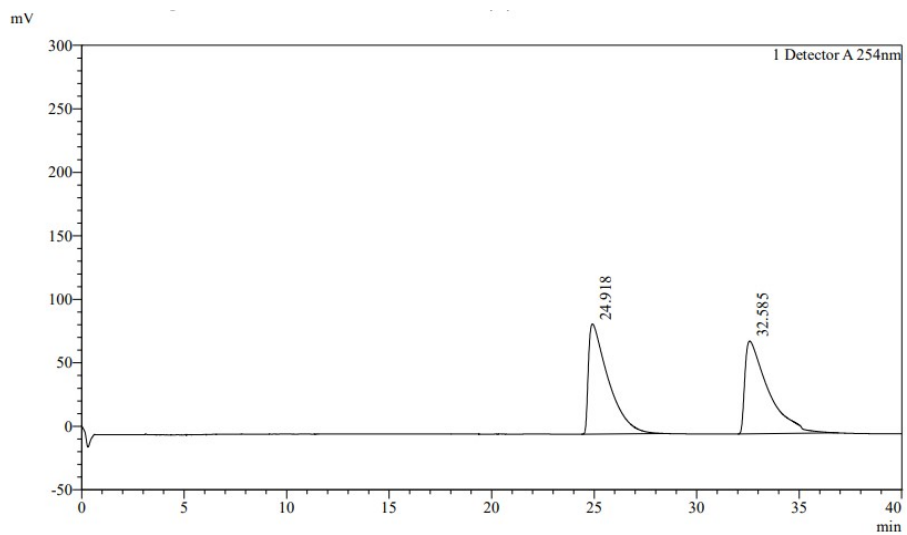

<Peak Table>

| Detector A 254nm |           |          |        |        |         |
|------------------|-----------|----------|--------|--------|---------|
| Peak#            | Ret. Time | Area     | Height | Conc.  | Area%   |
| 1                | 24.918    | 5850278  | 86756  | 50.218 | 50.218  |
| 2                | 32.585    | 5799489  | 73038  | 49.782 | 49.782  |
| Total            |           | 11649767 | 159794 |        | 100.000 |

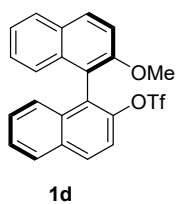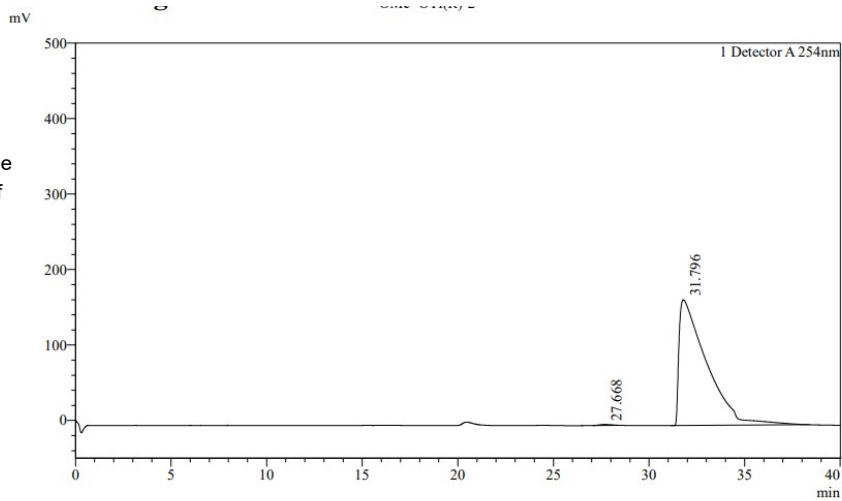

<Peak Table>

| Detector A 254nm |           |          |        |        |         |
|------------------|-----------|----------|--------|--------|---------|
| Peak#            | Ret. Time | Area     | Height | Conc.  | Area%   |
| 1                | 27.668    | 61288    | 1334   | 0.364  | 0.364   |
| 2                | 31.796    | 16754773 | 166736 | 99.636 | 99.636  |
| Total            |           | 16816061 | 168070 |        | 100.000 |



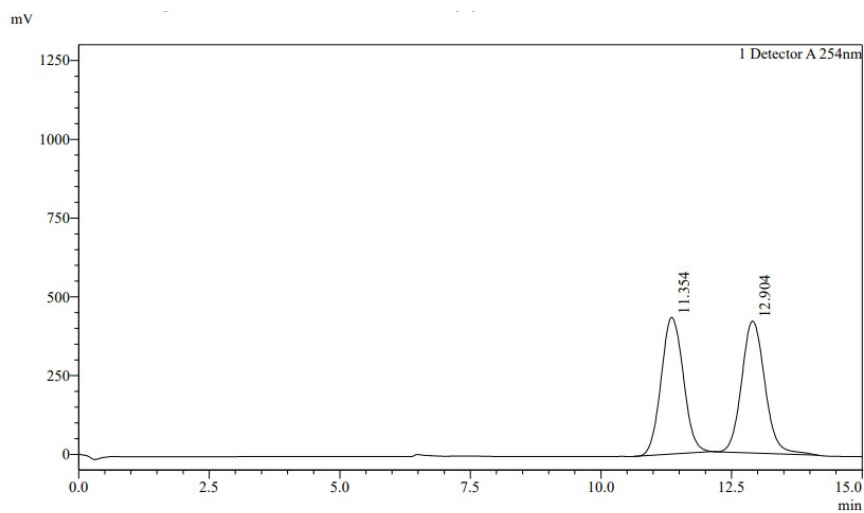

<Peak Table>

| Detector A 254nm |           |          |        |        |         |
|------------------|-----------|----------|--------|--------|---------|
| Peak#            | Ret. Time | Area     | Height | Conc.  | Area%   |
| 1                | 11.354    | 12854298 | 433692 | 49.728 | 49.728  |
| 2                | 12.904    | 12994989 | 418424 | 50.272 | 50.272  |
| Total            |           | 25849287 | 852116 |        | 100.000 |

<Chromatogram>

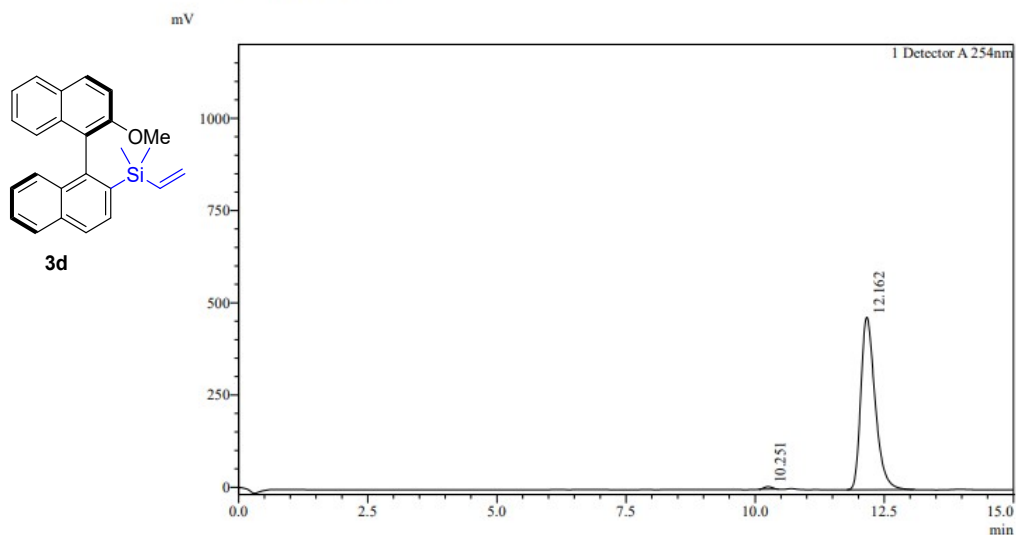

<Peak Table>

| Detector A 254nm |           |         |        |        |         |
|------------------|-----------|---------|--------|--------|---------|
| Peak#            | Ret. Time | Area    | Height | Conc.  | Area%   |
| 1                | 10.251    | 75119   | 6875   | 0.824  | 0.824   |
| 2                | 12.162    | 9038812 | 467393 | 99.176 | 99.176  |
| Total            |           | 9113931 | 474268 |        | 100.000 |

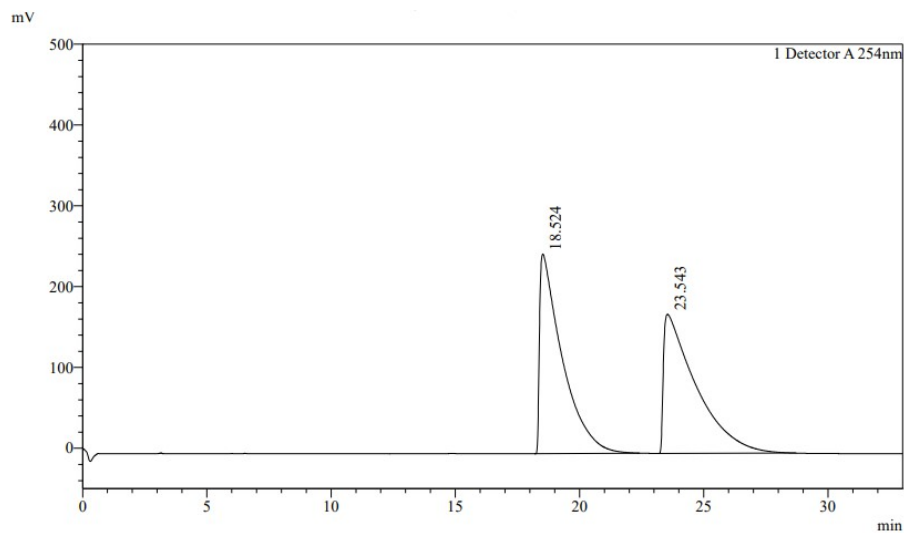

<Peak Table>

| Detector A 254nm |           |          |        |        |         |
|------------------|-----------|----------|--------|--------|---------|
| Peak#            | Ret. Time | Area     | Height | Conc.  | Area%   |
| 1                | 18.524    | 15588258 | 247228 | 49.890 | 49.890  |
| 2                | 23.543    | 15657306 | 172059 | 50.110 | 50.110  |
| Total            |           | 31245564 | 419288 |        | 100.000 |

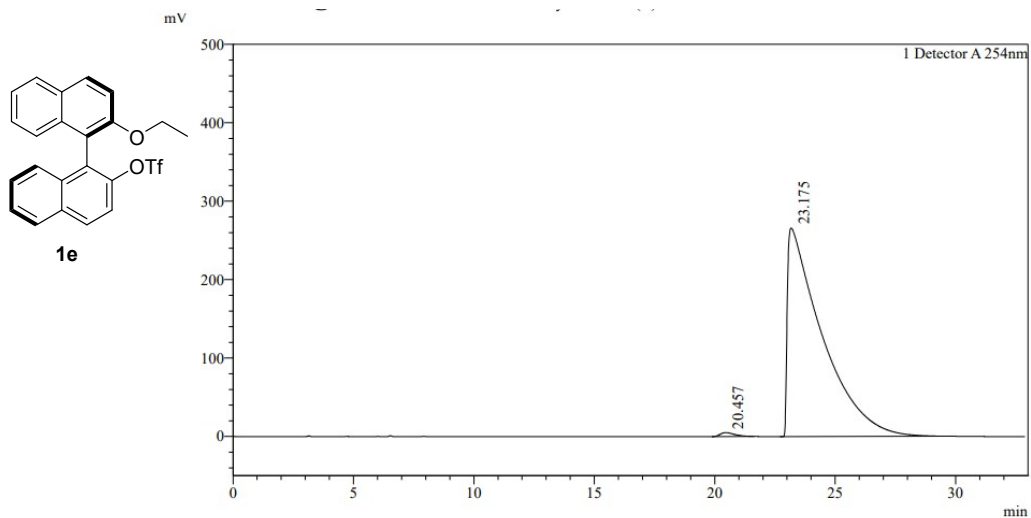

<Peak Table>

| Detector A 254nm |           |          |        |        |         |
|------------------|-----------|----------|--------|--------|---------|
| Peak#            | Ret. Time | Area     | Height | Conc.  | Area%   |
| 1                | 20.457    | 208725   | 5086   | 0.778  | 0.778   |
| 2                | 23.175    | 26611282 | 265902 | 99.222 | 99.222  |
| Total            |           | 26820007 | 270988 |        | 100.000 |

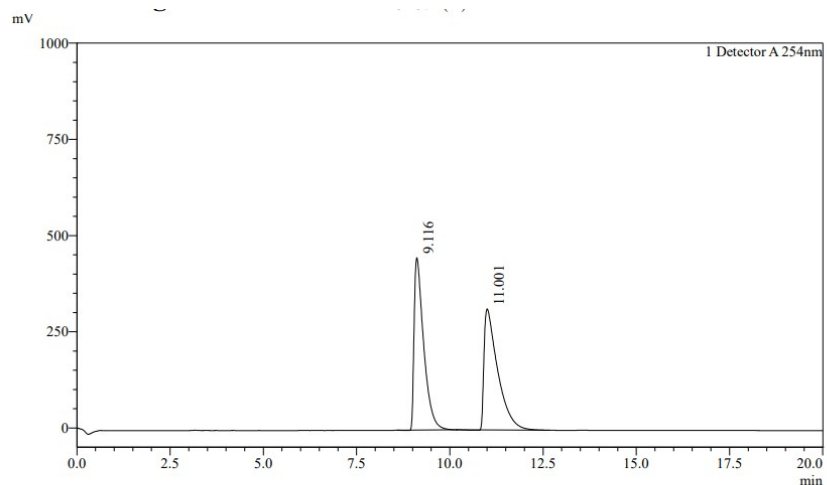

<Peak Table>

| Detector A 254nm |           |          |        |        |         |
|------------------|-----------|----------|--------|--------|---------|
| Peak#            | Ret. Time | Area     | Height | Conc.  | Area%   |
| 1                | 9.116     | 7990304  | 447605 | 49.797 | 49.797  |
| 2                | 11.001    | 8055411  | 314582 | 50.203 | 50.203  |
| Total            |           | 16045714 | 762186 |        | 100.000 |

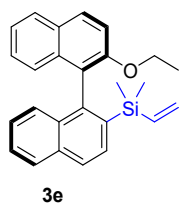

3e

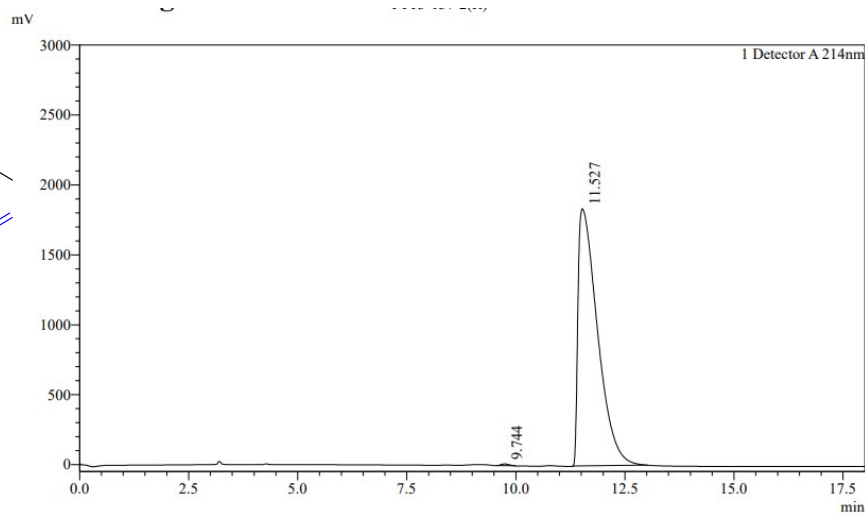

<Peak Table>

| Detector A 214nm |           |          |         |        |         |
|------------------|-----------|----------|---------|--------|---------|
| Peak#            | Ret. Time | Area     | Height  | Conc.  | Area%   |
| 1                | 9.744     | 156293   | 12171   | 0.273  | 0.273   |
| 2                | 11.527    | 57142253 | 1837967 | 99.727 | 99.727  |
| Total            |           | 57298546 | 1850138 |        | 100.000 |

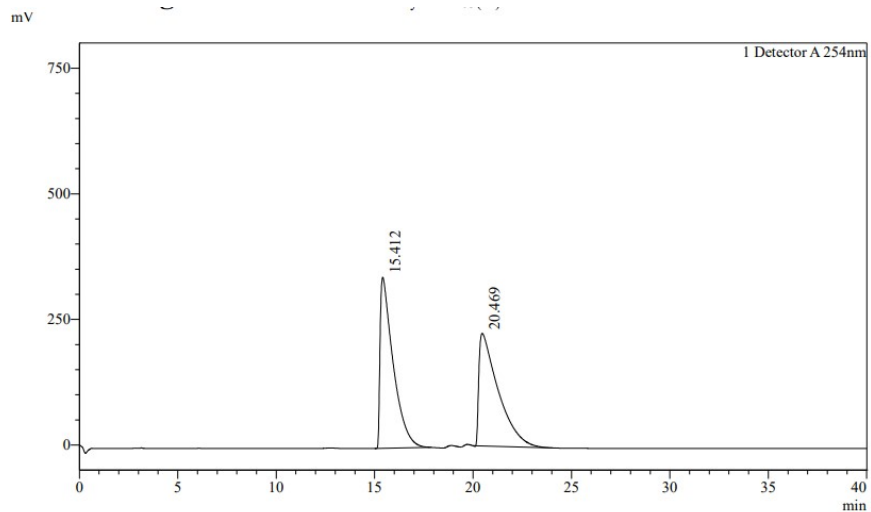

<Peak Table>

| Detector A 254nm |           |          |        |        |         |
|------------------|-----------|----------|--------|--------|---------|
| Peak#            | Ret. Time | Area     | Height | Conc.  | Area%   |
| 1                | 15.412    | 15705105 | 340274 | 50.615 | 50.615  |
| 2                | 20.469    | 15323490 | 224326 | 49.385 | 49.385  |
| Total            |           | 31028595 | 564599 |        | 100.000 |

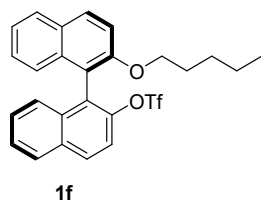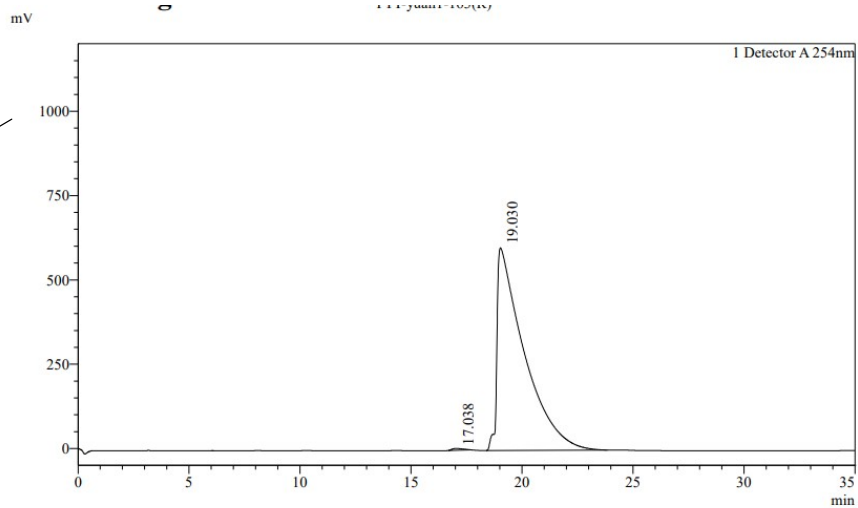

<Peak Table>

| Detector A 254nm |           |          |        |        |         |
|------------------|-----------|----------|--------|--------|---------|
| Peak#            | Ret. Time | Area     | Height | Conc.  | Area%   |
| 1                | 17.038    | 186841   | 5491   | 0.364  | 0.364   |
| 2                | 19.030    | 51113822 | 600894 | 99.636 | 99.636  |
| Total            |           | 51300664 | 606385 |        | 100.000 |

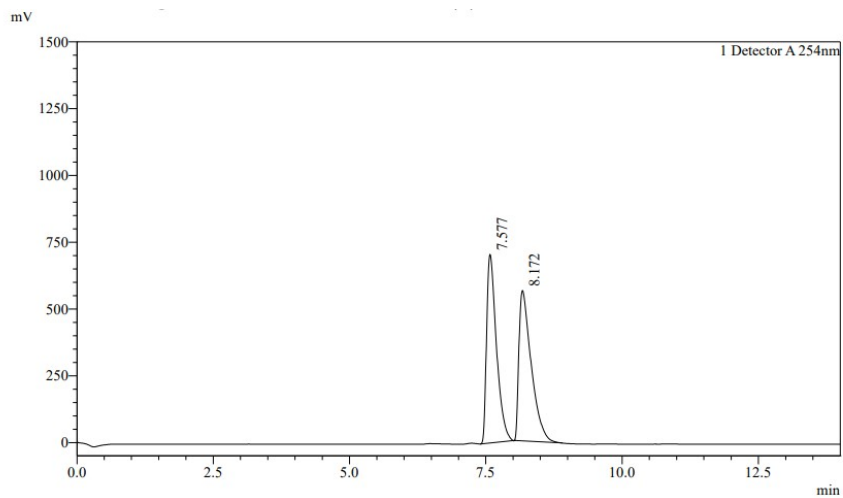

<Peak Table>

| Detector A 254nm |           |          |         |        |         |
|------------------|-----------|----------|---------|--------|---------|
| Peak#            | Ret. Time | Area     | Height  | Conc.  | Area%   |
| 1                | 7.577     | 8858971  | 705829  | 50.033 | 50.033  |
| 2                | 8.172     | 8847284  | 562846  | 49.967 | 49.967  |
| Total            |           | 17706256 | 1268674 |        | 100.000 |

<Chromatogram>

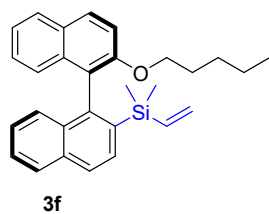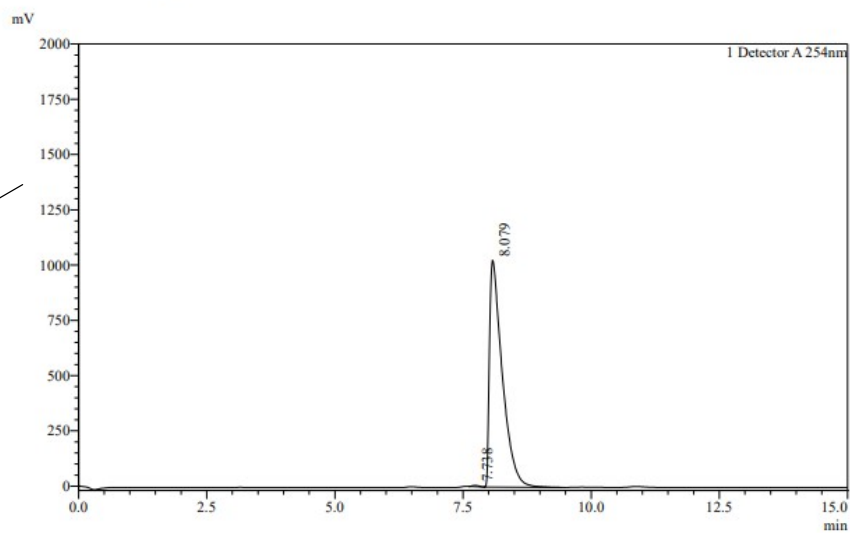

<Peak Table>

| Detector A 254nm |           |          |         |        |         |
|------------------|-----------|----------|---------|--------|---------|
| Peak#            | Ret. Time | Area     | Height  | Conc.  | Area%   |
| 1                | 7.738     | 52910    | 5861    | 0.296  | 0.296   |
| 2                | 8.079     | 17835566 | 1025289 | 99.704 | 99.704  |
| Total            |           | 17888476 | 1031150 |        | 100.000 |

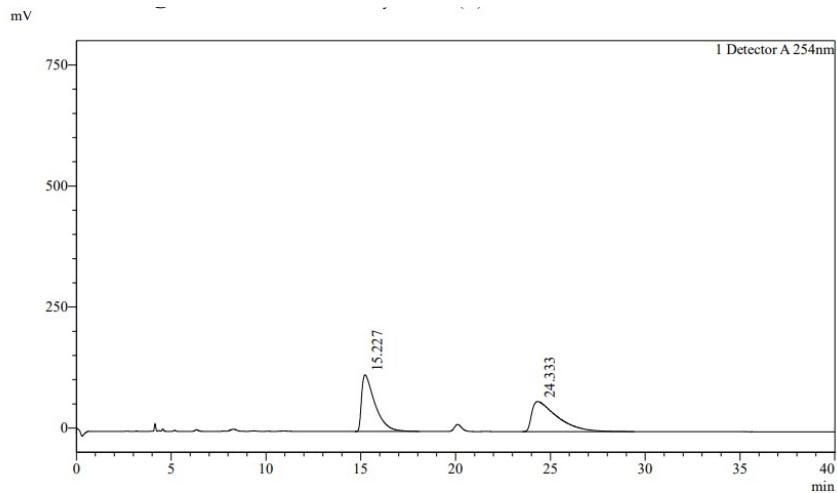

<Peak Table>

| Detector A 254nm |           |          |        |        |         |
|------------------|-----------|----------|--------|--------|---------|
| Peak#            | Ret. Time | Area     | Height | Conc.  | Area%   |
| 1                | 15.227    | 5714370  | 116913 | 49.810 | 49.810  |
| 2                | 24.333    | 5757882  | 62053  | 50.190 | 50.190  |
| Total            |           | 11472252 | 178966 |        | 100.000 |

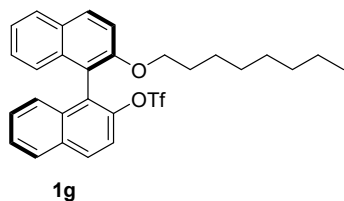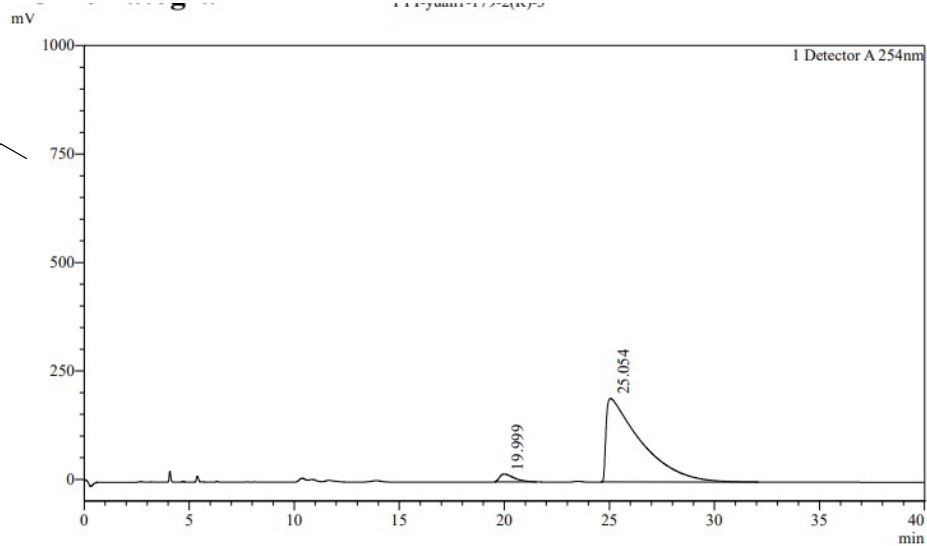

<Peak Table>

| Detector A 254nm |           |          |        |        |         |
|------------------|-----------|----------|--------|--------|---------|
| Peak#            | Ret. Time | Area     | Height | Conc.  | Area%   |
| 1                | 19.999    | 841309   | 18003  | 3.667  | 3.667   |
| 2                | 25.054    | 22098638 | 192464 | 96.333 | 96.333  |
| Total            |           | 22939947 | 210467 |        | 100.000 |

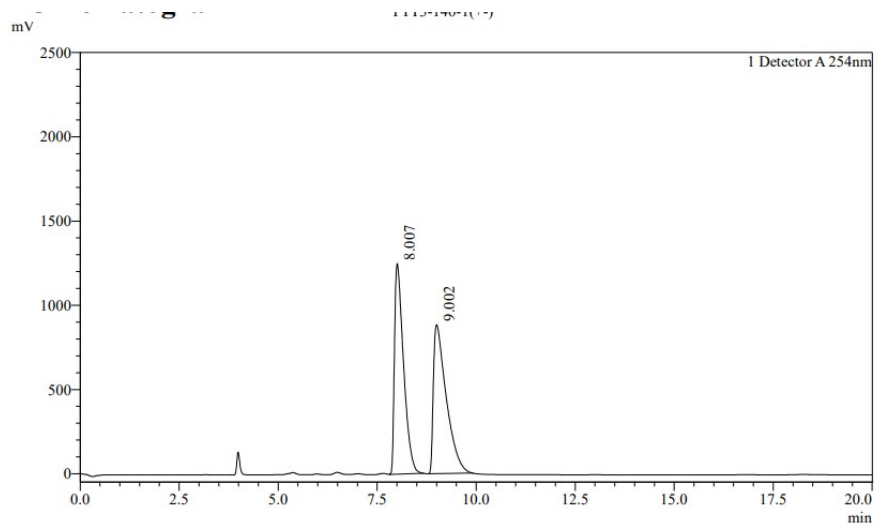

<Peak Table>

| Detector A 254nm |           |          |         |        |         |
|------------------|-----------|----------|---------|--------|---------|
| Peak#            | Ret. Time | Area     | Height  | Conc.  | Area%   |
| 1                | 8.007     | 19875428 | 1248705 | 49.776 | 49.776  |
| 2                | 9.002     | 20054140 | 884582  | 50.224 | 50.224  |
| Total            |           | 39929568 | 2133288 |        | 100.000 |

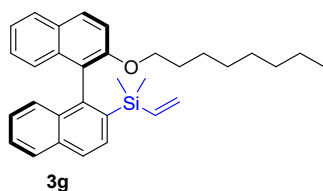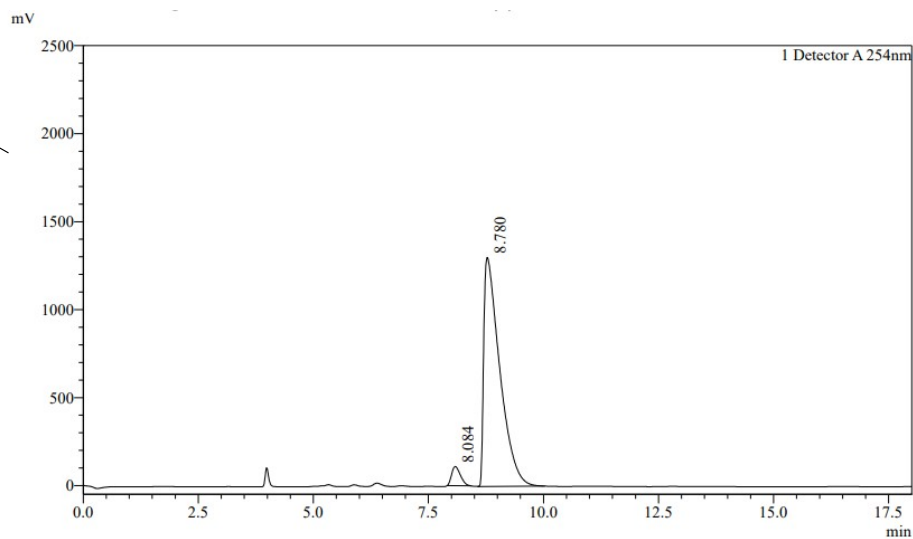

<Peak Table>

| Detector A 254nm |           |          |         |        |         |
|------------------|-----------|----------|---------|--------|---------|
| Peak#            | Ret. Time | Area     | Height  | Conc.  | Area%   |
| 1                | 8.084     | 1456034  | 109098  | 4.417  | 4.417   |
| 2                | 8.780     | 31511114 | 1301419 | 95.583 | 95.583  |
| Total            |           | 32967148 | 1410517 |        | 100.000 |

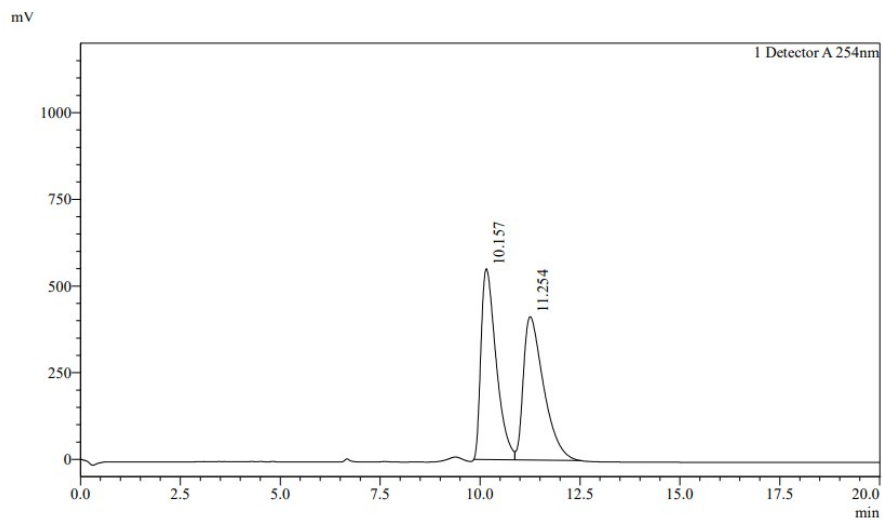

<Peak Table>

| Detector A 254nm |           |          |        |        |         |
|------------------|-----------|----------|--------|--------|---------|
| Peak#            | Ret. Time | Area     | Height | Conc.  | Area%   |
| 1                | 10.157    | 14512057 | 550356 | 49.745 | 49.745  |
| 2                | 11.254    | 14660887 | 413423 | 50.255 | 50.255  |
| Total            |           | 29172944 | 963778 |        | 100.000 |

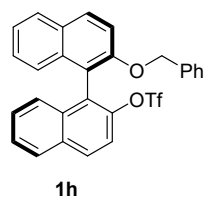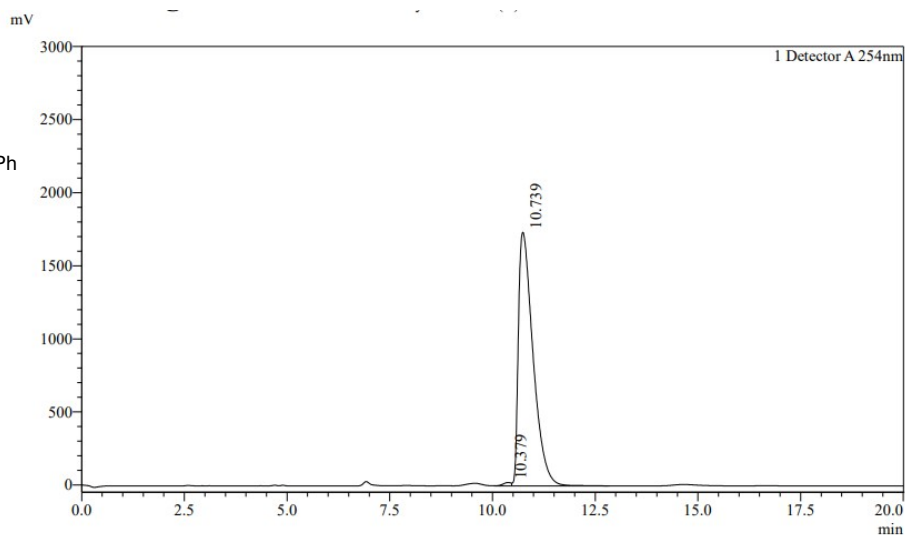

<Peak Table>

| Detector A 254nm |           |          |         |        |         |
|------------------|-----------|----------|---------|--------|---------|
| Peak#            | Ret. Time | Area     | Height  | Conc.  | Area%   |
| 1                | 10.379    | 309099   | 22820   | 0.712  | 0.712   |
| 2                | 10.739    | 43114816 | 1735052 | 99.288 | 99.288  |
| Total            |           | 43423916 | 1757872 |        | 100.000 |



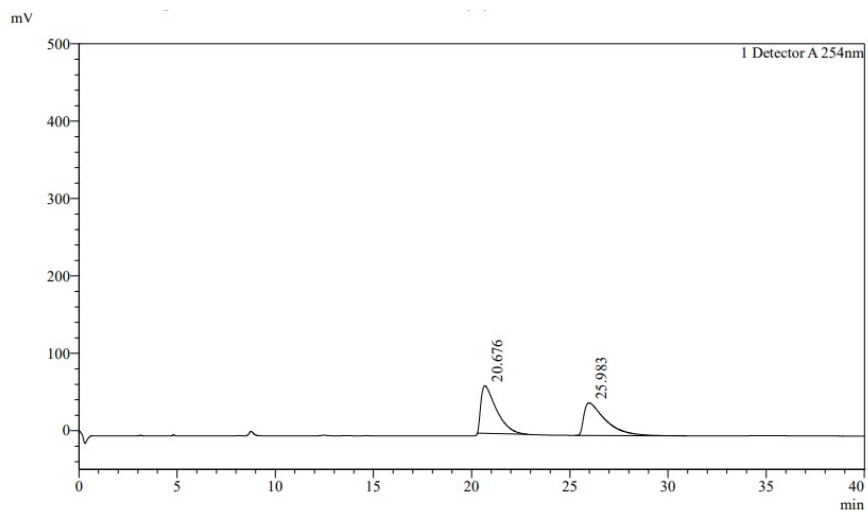

<Peak Table>

| Detector A 254nm |           |         |        |        |         |
|------------------|-----------|---------|--------|--------|---------|
| Peak#            | Ret. Time | Area    | Height | Conc.  | Area%   |
| 1                | 20.676    | 3381921 | 61464  | 51.289 | 51.289  |
| 2                | 25.983    | 3211939 | 42249  | 48.711 | 48.711  |
| Total            |           | 6593860 | 103714 |        | 100.000 |

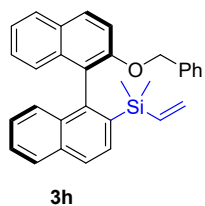

3h

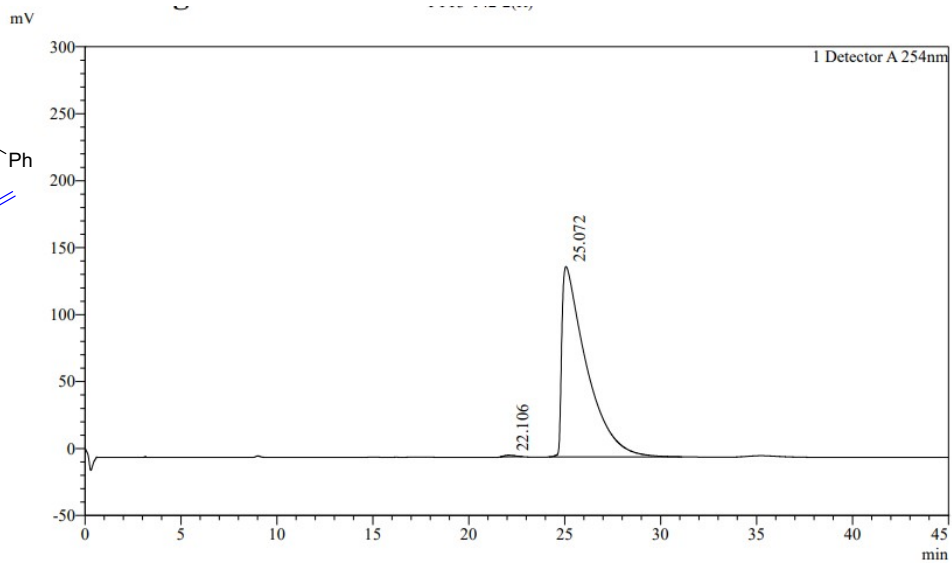

<Peak Table>

| Detector A 254nm |           |          |        |        |         |
|------------------|-----------|----------|--------|--------|---------|
| Peak#            | Ret. Time | Area     | Height | Conc.  | Area%   |
| 1                | 22.106    | 46583    | 1203   | 0.366  | 0.366   |
| 2                | 25.072    | 12671073 | 142107 | 99.634 | 99.634  |
| Total            |           | 12717656 | 143309 |        | 100.000 |

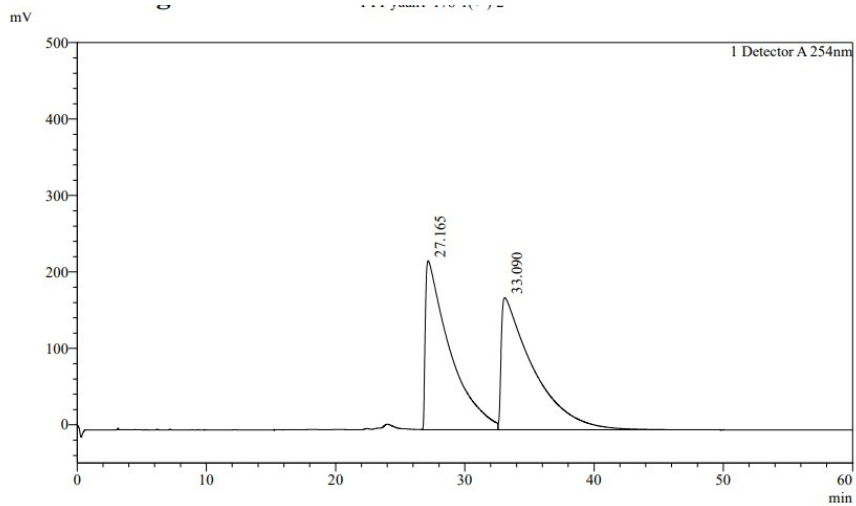

<Peak Table>

| Detector A 254nm |           |          |        |        |         |
|------------------|-----------|----------|--------|--------|---------|
| Peak#            | Ret. Time | Area     | Height | Conc.  | Area%   |
| 1                | 27.165    | 29045854 | 220914 | 49.728 | 49.728  |
| 2                | 33.090    | 29364079 | 172696 | 50.272 | 50.272  |
| Total            |           | 58409932 | 393610 |        | 100.000 |

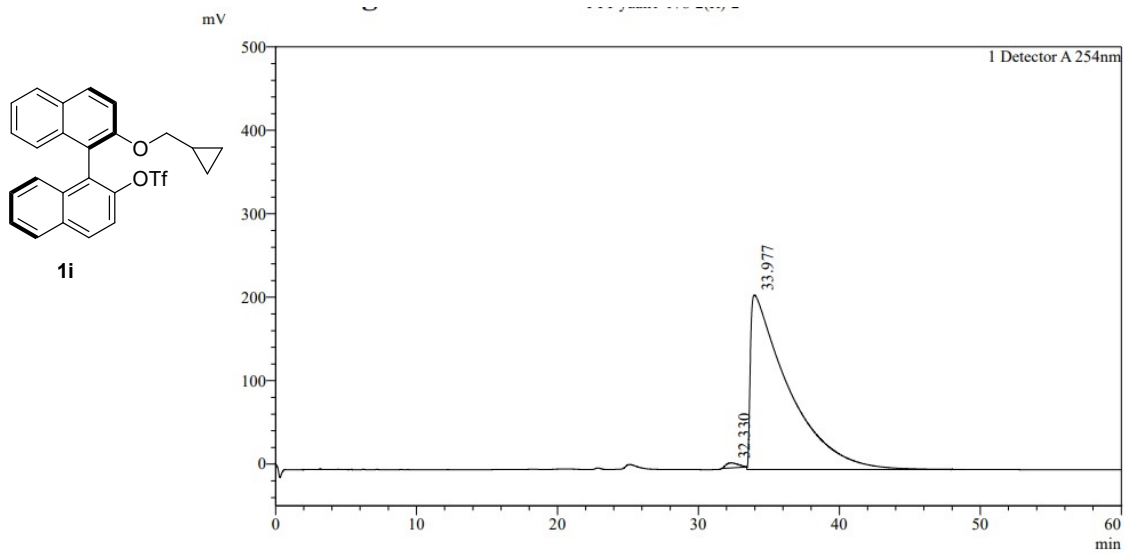

<Peak Table>

| Detector A 254nm |           |          |        |        |         |
|------------------|-----------|----------|--------|--------|---------|
| Peak#            | Ret. Time | Area     | Height | Conc.  | Area%   |
| 1                | 32.330    | 370766   | 6057   | 0.940  | 0.940   |
| 2                | 33.977    | 39056588 | 209206 | 99.060 | 99.060  |
| Total            |           | 39427354 | 215263 |        | 100.000 |

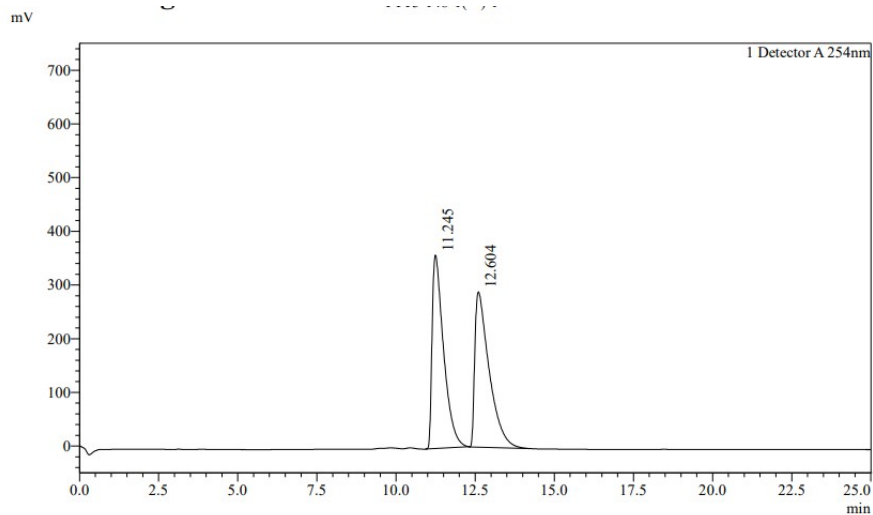

<Peak Table>

| Detector A 254nm |           |          |        |        |         |
|------------------|-----------|----------|--------|--------|---------|
| Peak#            | Ret. Time | Area     | Height | Conc.  | Area%   |
| 1                | 11.245    | 9098770  | 360110 | 49.965 | 49.965  |
| 2                | 12.604    | 9111696  | 289073 | 50.035 | 50.035  |
| Total            |           | 18210466 | 649182 |        | 100.000 |

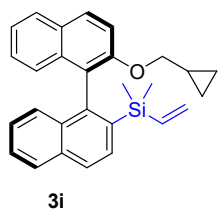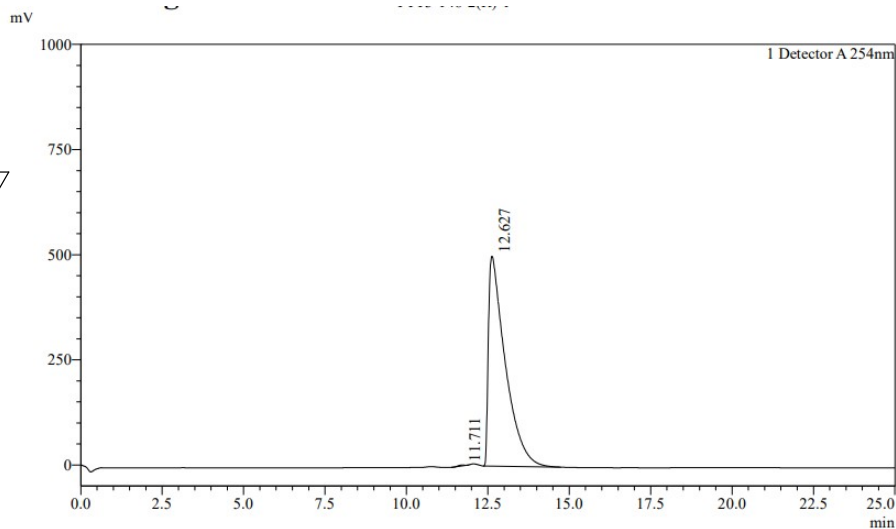

<Peak Table>

| Detector A 254nm |           |          |        |        |         |
|------------------|-----------|----------|--------|--------|---------|
| Peak#            | Ret. Time | Area     | Height | Conc.  | Area%   |
| 1                | 11.711    | 28262    | 2142   | 0.157  | 0.157   |
| 2                | 12.627    | 17995454 | 499317 | 99.843 | 99.843  |
| Total            |           | 18023716 | 501459 |        | 100.000 |

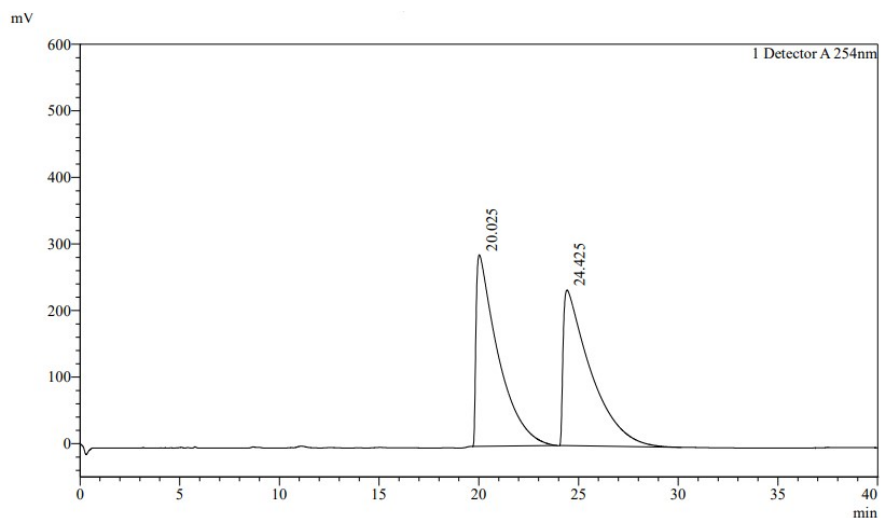

<Peak Table>

| Detector A 254nm |           |          |        |        |         |
|------------------|-----------|----------|--------|--------|---------|
| Peak#            | Ret. Time | Area     | Height | Conc.  | Area%   |
| 1                | 20.025    | 21987841 | 287803 | 49.667 | 49.667  |
| 2                | 24.425    | 22282990 | 233702 | 50.333 | 50.333  |
| Total            |           | 44270832 | 521505 |        | 100.000 |

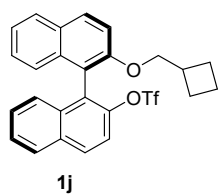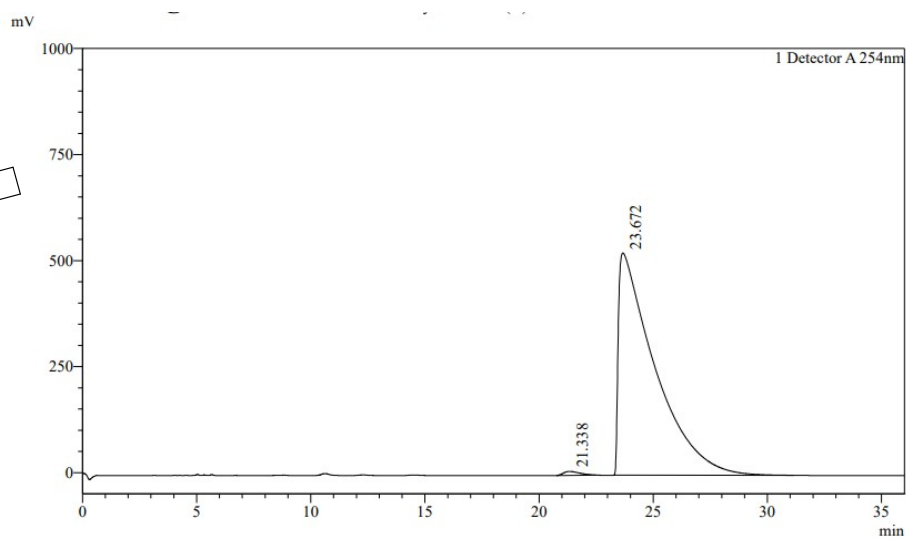

<Peak Table>

| Detector A 254nm |           |          |        |        |         |
|------------------|-----------|----------|--------|--------|---------|
| Peak#            | Ret. Time | Area     | Height | Conc.  | Area%   |
| 1                | 21.338    | 450224   | 9231   | 0.768  | 0.768   |
| 2                | 23.672    | 58136365 | 523712 | 99.232 | 99.232  |
| Total            |           | 58586589 | 532943 |        | 100.000 |

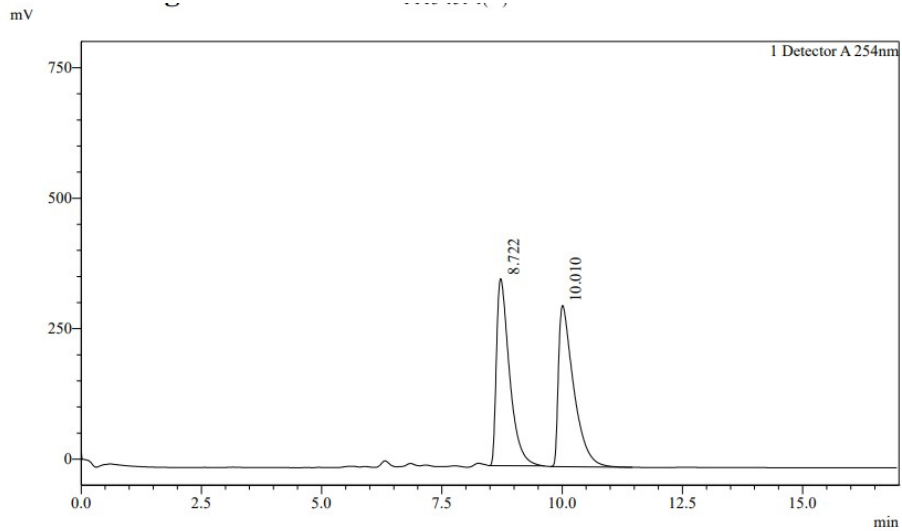

<Peak Table>

| Detector A 254nm |           |          |        |        |         |
|------------------|-----------|----------|--------|--------|---------|
| Peak#            | Ret. Time | Area     | Height | Conc.  | Area%   |
| 1                | 8.722     | 6759782  | 358294 | 49.890 | 49.890  |
| 2                | 10.010    | 6789493  | 308707 | 50.110 | 50.110  |
| Total            |           | 13549276 | 667000 |        | 100.000 |

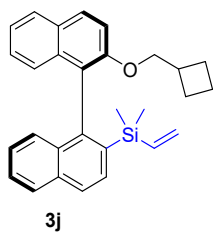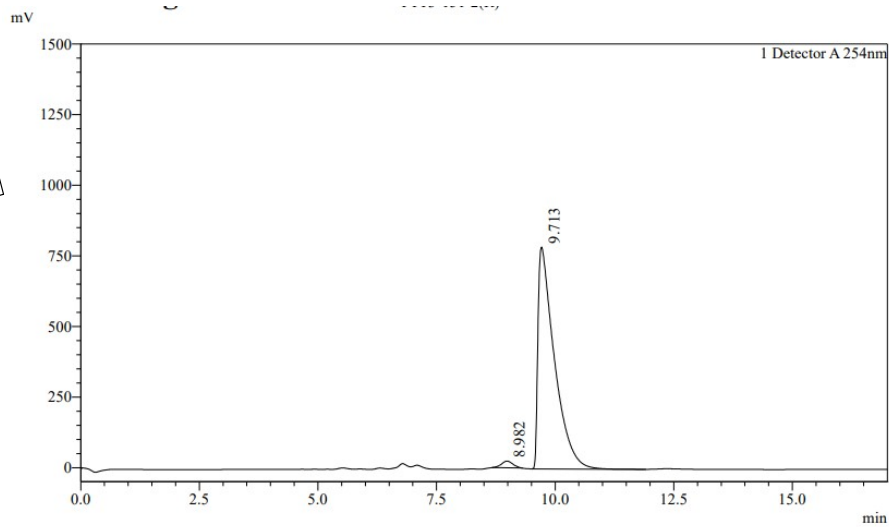

<Peak Table>

| Detector A 254nm |           |          |        |        |         |
|------------------|-----------|----------|--------|--------|---------|
| Peak#            | Ret. Time | Area     | Height | Conc.  | Area%   |
| 1                | 8.982     | 399982   | 23891  | 2.066  | 2.066   |
| 2                | 9.713     | 18960579 | 784823 | 97.934 | 97.934  |
| Total            |           | 19360561 | 808713 |        | 100.000 |

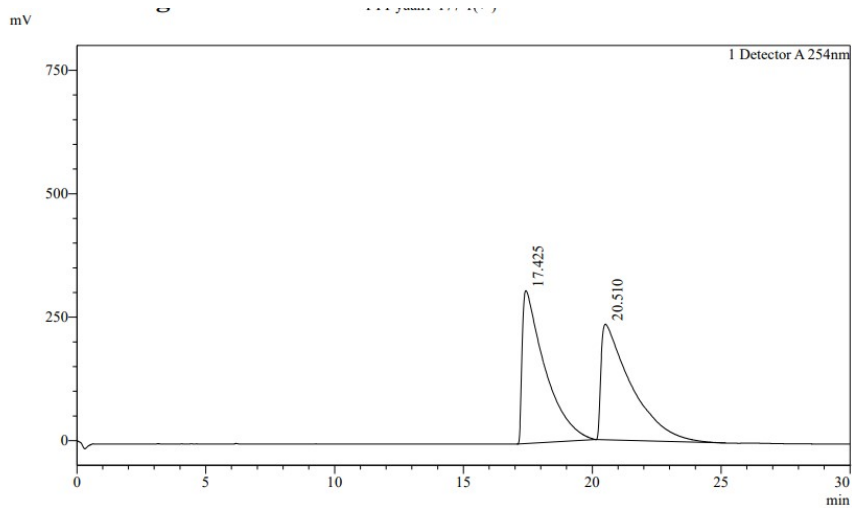

<Peak Table>

| Detector A 254nm |           |          |        |        |         |
|------------------|-----------|----------|--------|--------|---------|
| Peak#            | Ret. Time | Area     | Height | Conc.  | Area%   |
| 1                | 17.425    | 19051941 | 309500 | 50.038 | 50.038  |
| 2                | 20.510    | 19023004 | 234064 | 49.962 | 49.962  |
| Total            |           | 38074944 | 543564 |        | 100.000 |

<Chromatogram>

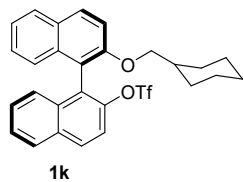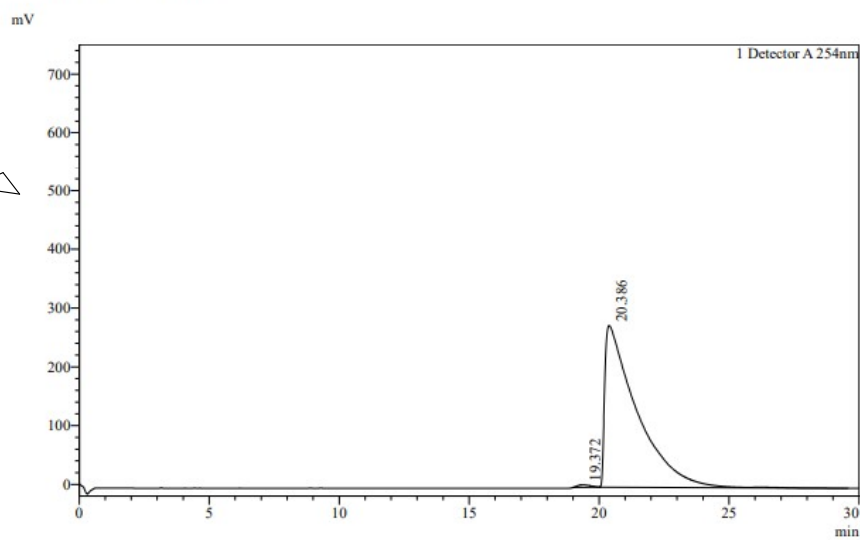

<Peak Table>

| Detector A 254nm |           |          |        |        |         |
|------------------|-----------|----------|--------|--------|---------|
| Peak#            | Ret. Time | Area     | Height | Conc.  | Area%   |
| 1                | 19.372    | 143047   | 4164   | 0.602  | 0.602   |
| 2                | 20.386    | 23609077 | 274886 | 99.398 | 99.398  |
| Total            |           | 23752124 | 279049 |        | 100.000 |

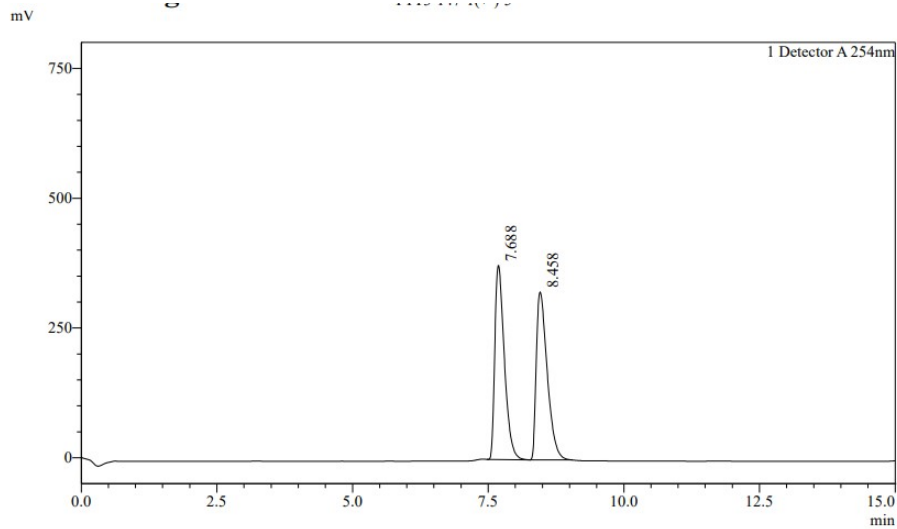

<Peak Table>

| Detector A 254nm |           |         |        |        |         |
|------------------|-----------|---------|--------|--------|---------|
| Peak#            | Ret. Time | Area    | Height | Conc.  | Area%   |
| 1                | 7.688     | 4587241 | 373666 | 50.251 | 50.251  |
| 2                | 8.458     | 4541356 | 323239 | 49.749 | 49.749  |
| Total            |           | 9128597 | 696905 |        | 100.000 |

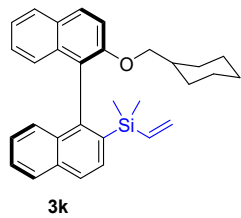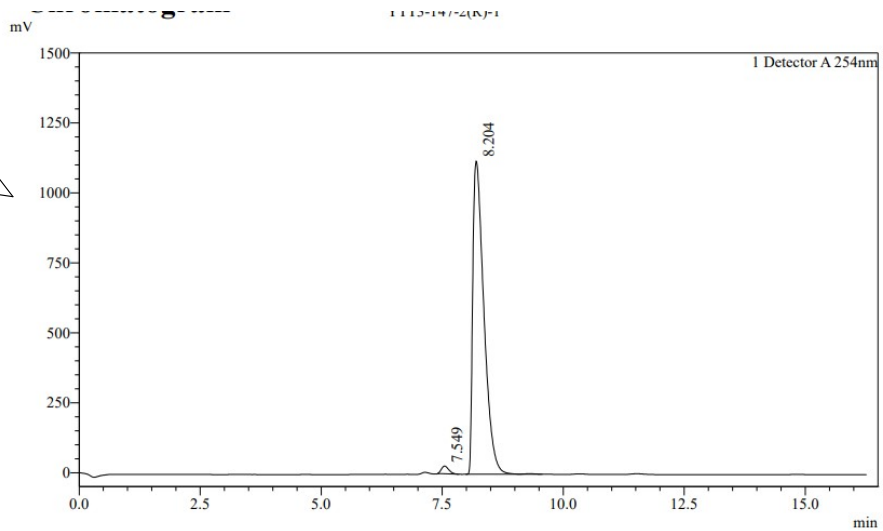

<Peak Table>

| Detector A 254nm |           |          |         |        |         |
|------------------|-----------|----------|---------|--------|---------|
| Peak#            | Ret. Time | Area     | Height  | Conc.  | Area%   |
| 1                | 7.549     | 292917   | 27960   | 1.609  | 1.609   |
| 2                | 8.204     | 17907717 | 1118838 | 98.391 | 98.391  |
| Total            |           | 18200633 | 1146798 |        | 100.000 |

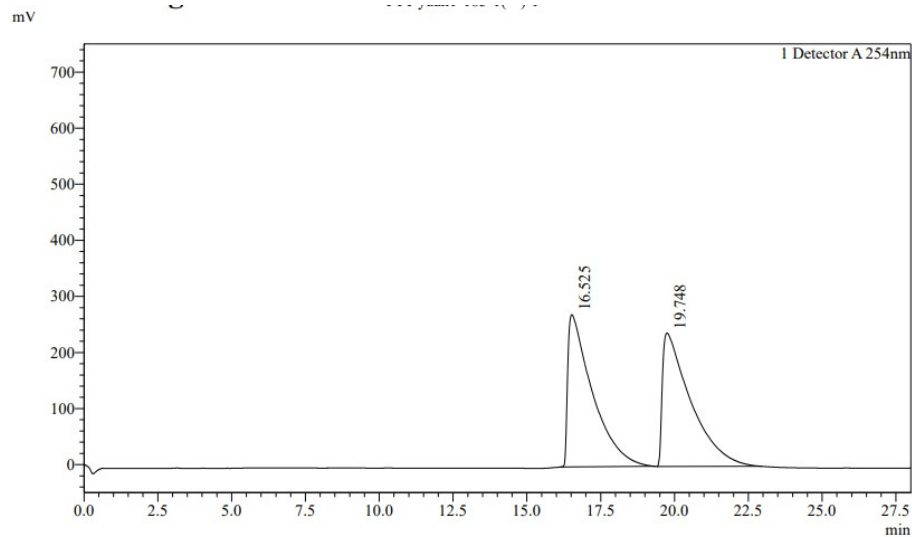

<Peak Table>

| Detector A 254nm |           |          |        |        |         |
|------------------|-----------|----------|--------|--------|---------|
| Peak#            | Ret. Time | Area     | Height | Conc.  | Area%   |
| 1                | 16.525    | 15772575 | 271375 | 49.885 | 49.885  |
| 2                | 19.748    | 15845127 | 237843 | 50.115 | 50.115  |
| Total            |           | 31617702 | 509218 |        | 100.000 |

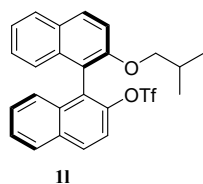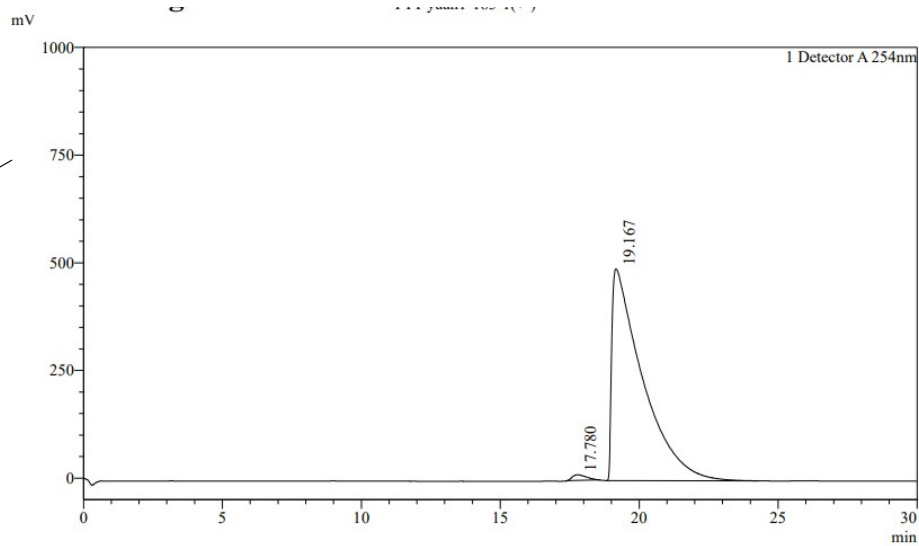

<Peak Table>

| Detector A 254nm |           |          |        |        |         |
|------------------|-----------|----------|--------|--------|---------|
| Peak#            | Ret. Time | Area     | Height | Conc.  | Area%   |
| 1                | 17.780    | 469181   | 13166  | 1.227  | 1.227   |
| 2                | 19.167    | 37781128 | 491638 | 98.773 | 98.773  |
| Total            |           | 38250308 | 504804 |        | 100.000 |



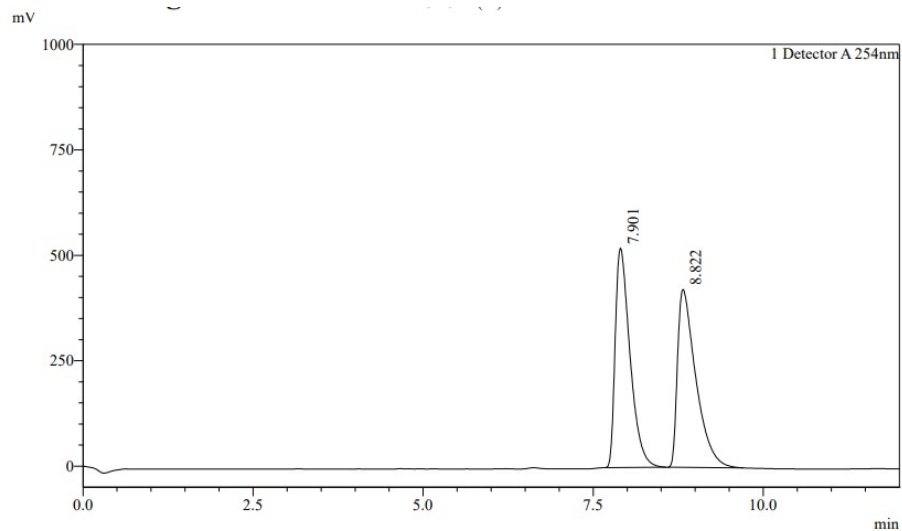

<Peak Table>

| Detector A 254nm |           |          |        |        |         |
|------------------|-----------|----------|--------|--------|---------|
| Peak#            | Ret. Time | Area     | Height | Conc.  | Area%   |
| 1                | 7.901     | 7864073  | 520026 | 49.832 | 49.832  |
| 2                | 8.822     | 7917031  | 421660 | 50.168 | 50.168  |
| Total            |           | 15781104 | 941687 |        | 100.000 |

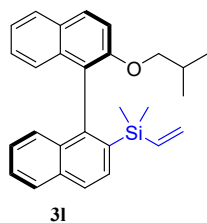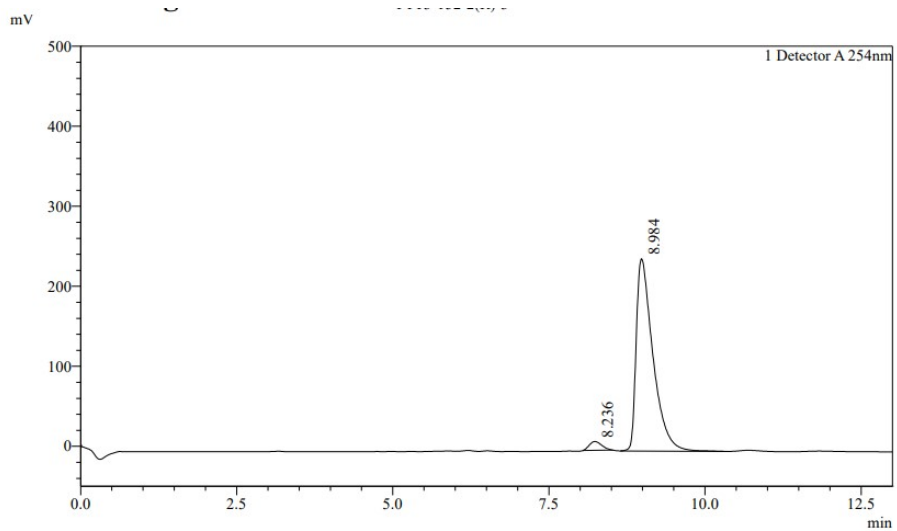

<Peak Table>

| Detector A 254nm |           |         |        |        |         |
|------------------|-----------|---------|--------|--------|---------|
| Peak#            | Ret. Time | Area    | Height | Conc.  | Area%   |
| 1                | 8.236     | 152583  | 11079  | 3.300  | 3.300   |
| 2                | 8.984     | 4471526 | 240335 | 96.700 | 96.700  |
| Total            |           | 4624109 | 251414 |        | 100.000 |

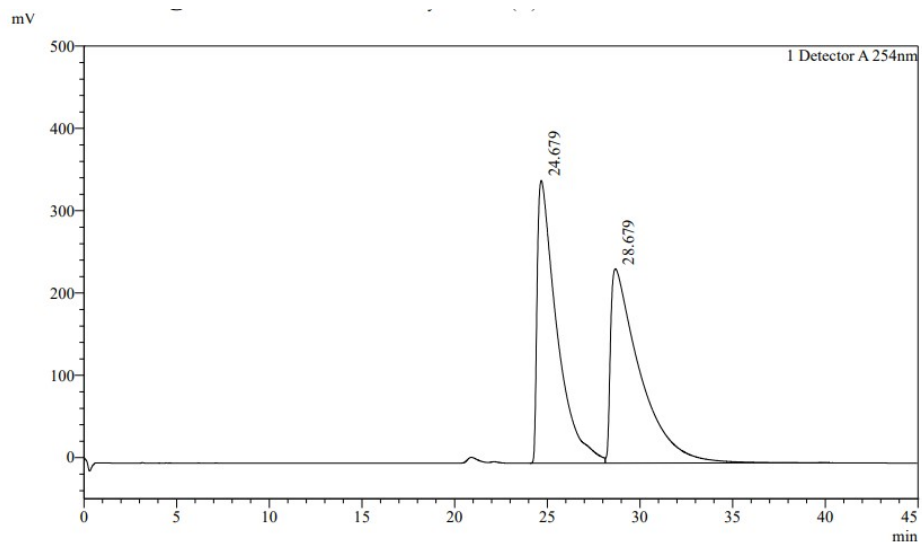

<Peak Table>

| Detector A 254nm |           |          |        |        |         |
|------------------|-----------|----------|--------|--------|---------|
| Peak#            | Ret. Time | Area     | Height | Conc.  | Area%   |
| 1                | 24.679    | 25427305 | 343403 | 49.509 | 49.509  |
| 2                | 28.679    | 25932121 | 235915 | 50.491 | 50.491  |
| Total            |           | 51359426 | 579318 |        | 100.000 |

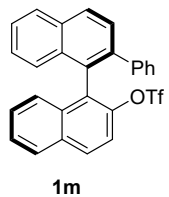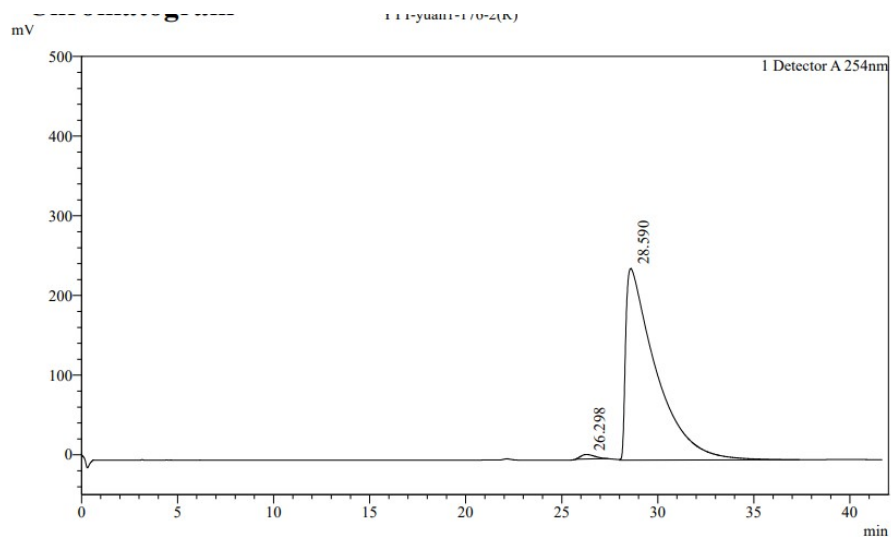

<Peak Table>

| Detector A 254nm |           |          |        |        |         |
|------------------|-----------|----------|--------|--------|---------|
| Peak#            | Ret. Time | Area     | Height | Conc.  | Area%   |
| 1                | 26.298    | 294950   | 5760   | 1.111  | 1.111   |
| 2                | 28.590    | 26248162 | 240254 | 98.889 | 98.889  |
| Total            |           | 26543112 | 246014 |        | 100.000 |

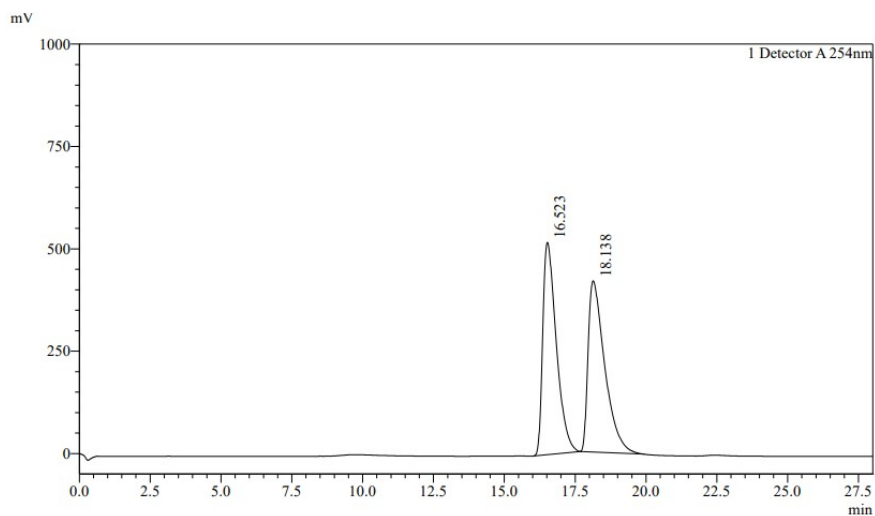

<Peak Table>

| Detector A 254nm |           |          |        |        |         |
|------------------|-----------|----------|--------|--------|---------|
| Peak#            | Ret. Time | Area     | Height | Conc.  | Area%   |
| 1                | 16.523    | 17267397 | 518368 | 50.211 | 50.211  |
| 2                | 18.138    | 17122158 | 417951 | 49.789 | 49.789  |
| Total            |           | 34389555 | 936320 |        | 100.000 |

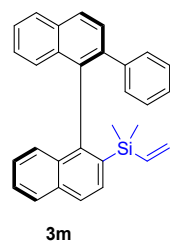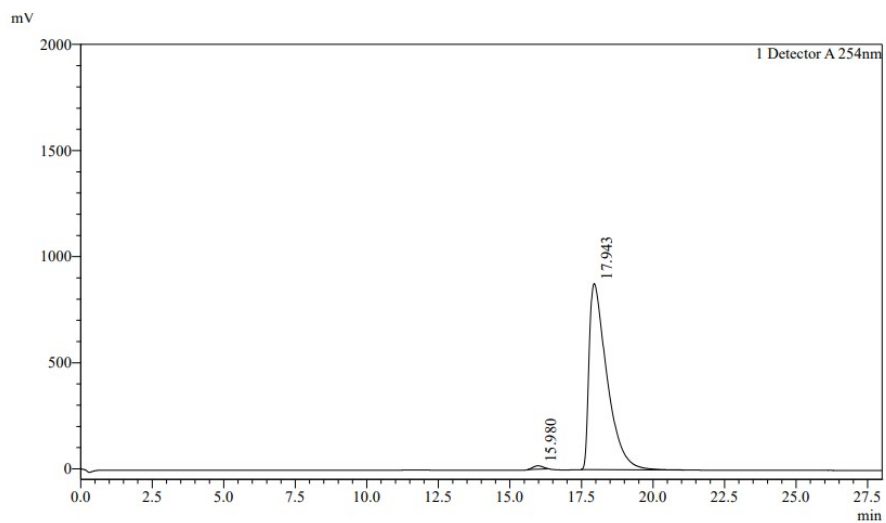

<Peak Table>

| Detector A 254nm |           |          |        |        |         |
|------------------|-----------|----------|--------|--------|---------|
| Peak#            | Ret. Time | Area     | Height | Conc.  | Area%   |
| 1                | 15.980    | 399028   | 16423  | 1.032  | 1.032   |
| 2                | 17.943    | 38253670 | 876748 | 98.968 | 98.968  |
| Total            |           | 38652697 | 893171 |        | 100.000 |

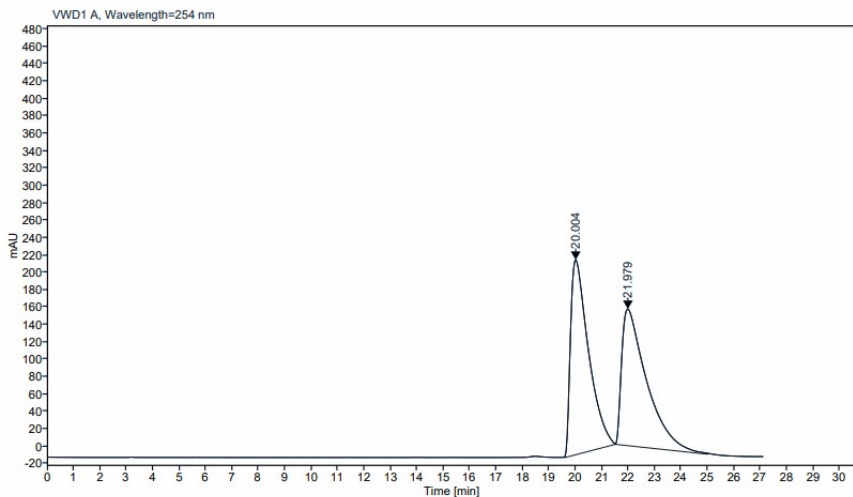

**Results**

| No. | RT[min] | Area       | Height   | Relative Height % | Relative Area % |
|-----|---------|------------|----------|-------------------|-----------------|
|     | 20.004  | 10604.5146 | 224.1636 | 58.78             | 50.70           |
|     | 21.979  | 10312.3926 | 157.2047 | 41.22             | 49.30           |
| SUM | 41.983  | 20916.9072 | 381.3683 | 100.00            | 100.00          |

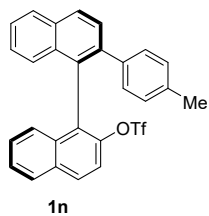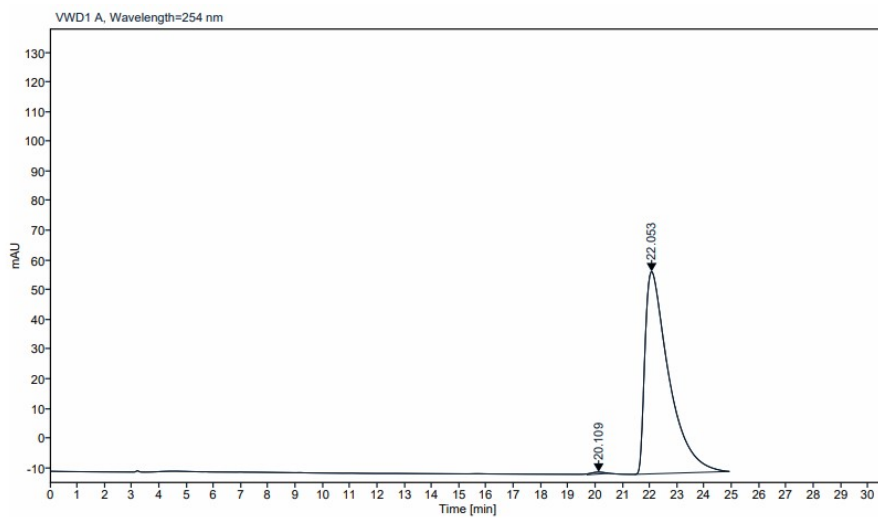

**Results**

| No. | RT[min] | Area      | Height  | Relative Height % | Relative Area % |
|-----|---------|-----------|---------|-------------------|-----------------|
|     | 20.109  | 21.2083   | 0.6436  | 0.94              | 0.51            |
|     | 22.053  | 4140.4175 | 68.1227 | 99.06             | 99.49           |
| SUM | 42.163  | 4161.6258 | 68.7663 | 100.00            | 100.00          |

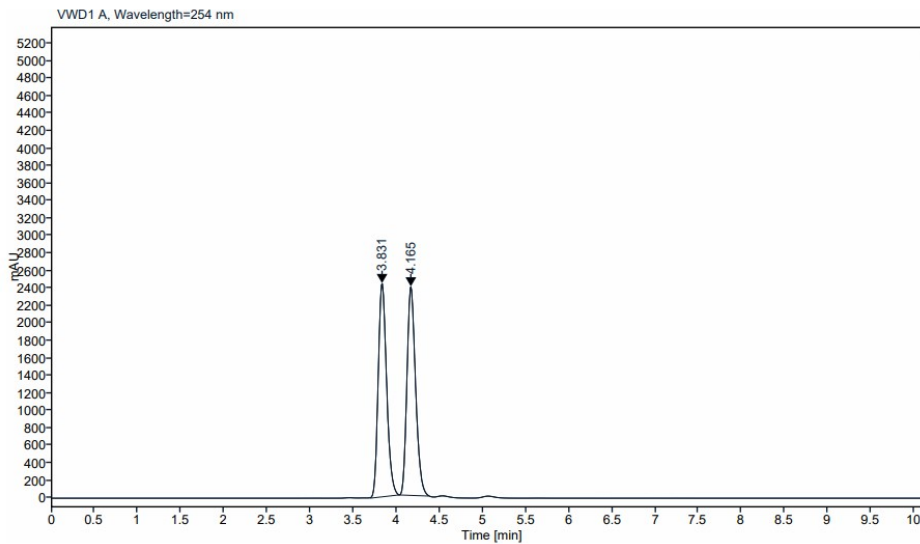

### Results

| No. | RT[min] | Area       | Height    | Height % | Relative Area % |
|-----|---------|------------|-----------|----------|-----------------|
|     | 3.831   | 16502.2617 | 2444.6929 | 50.56    | 49.84           |
|     | 4.165   | 16611.5059 | 2390.1685 | 49.44    | 50.16           |
| SUM | 7.996   | 33113.7676 | 4834.8613 | 100.00   | 100.00          |

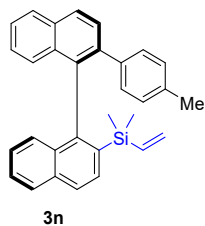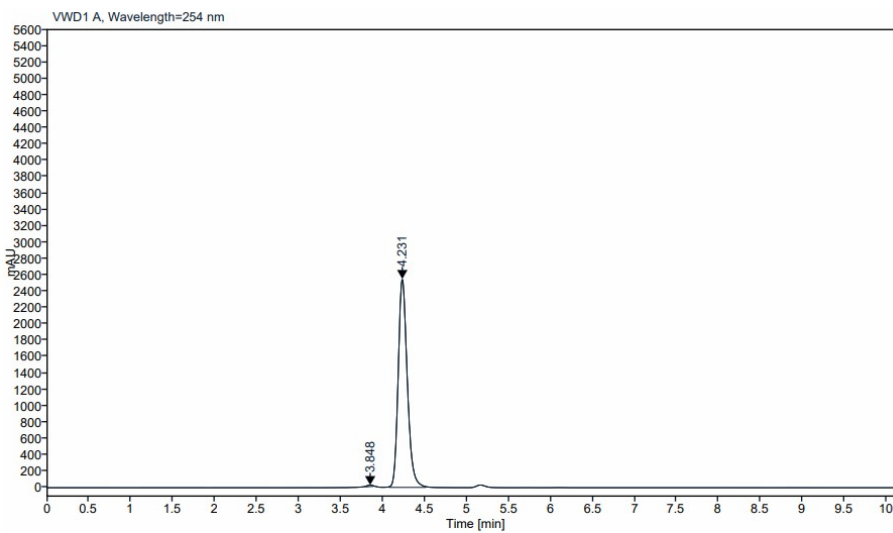

### Results

| No. | RT[min] | Area       | Height    | Relative Height % | Relative Area % |
|-----|---------|------------|-----------|-------------------|-----------------|
|     | 3.848   | 75.7742    | 17.8290   | 0.69              | 0.39            |
|     | 4.231   | 19180.8496 | 2549.3303 | 99.31             | 99.61           |
| SUM | 8.079   | 19256.6238 | 2567.1593 | 100.00            | 100.00          |

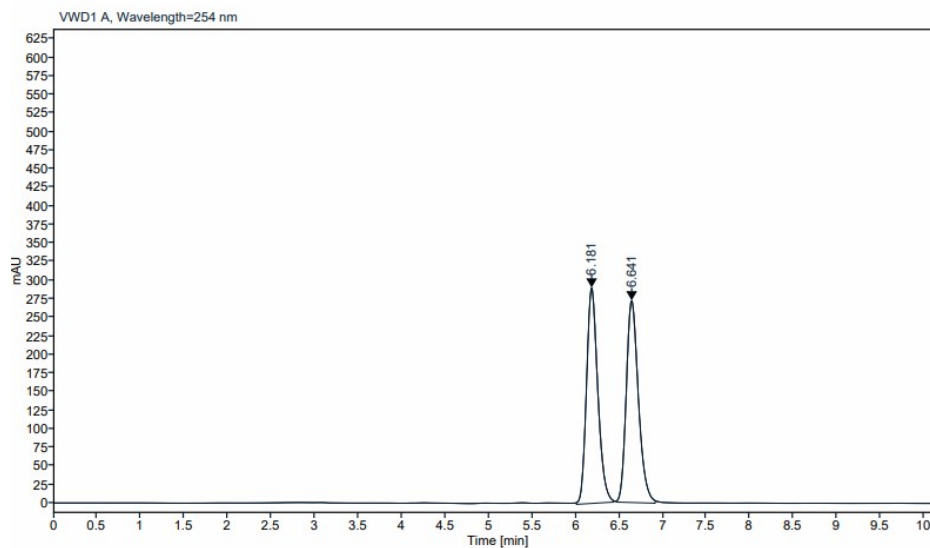

### Results

| No. | RT[min] | Area      | Height   | Relative Height % | Relative Area % |
|-----|---------|-----------|----------|-------------------|-----------------|
|     | 6.181   | 2618.4912 | 290.5511 | 51.65             | 49.88           |
|     | 6.641   | 2631.2188 | 272.0381 | 48.35             | 50.12           |
| SUM | 12.821  | 5249.7100 | 562.5891 | 100.00            | 100.00          |

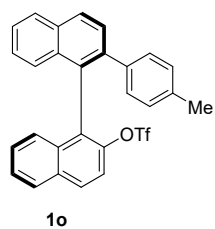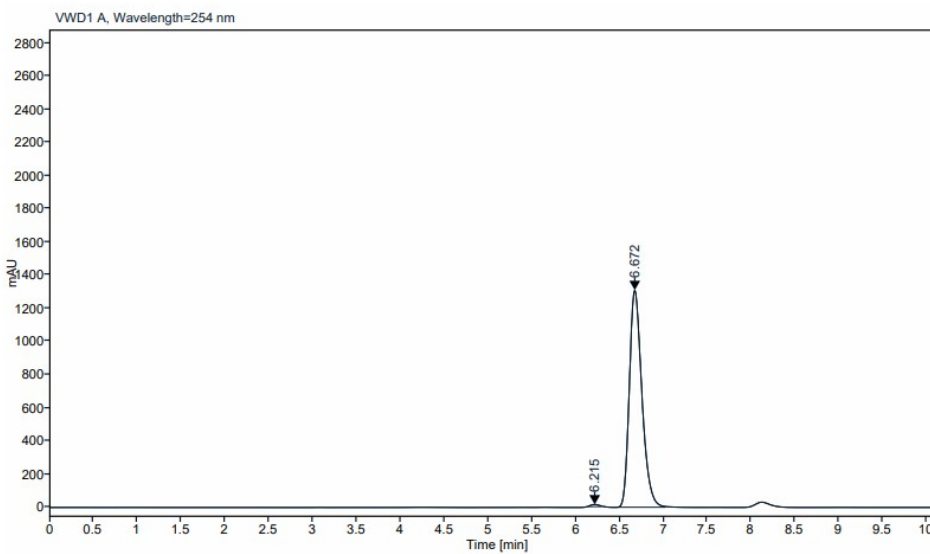

### Results

| No. | RT[min] | Area       | Height    | Relative Height % | Relative Area % |
|-----|---------|------------|-----------|-------------------|-----------------|
|     | 6.215   | 78.4706    | 12.8130   | 0.97              | 0.60            |
|     | 6.672   | 13058.7480 | 1309.6860 | 99.03             | 99.40           |
| SUM | 12.886  | 13137.2187 | 1322.4990 | 100.00            | 100.00          |

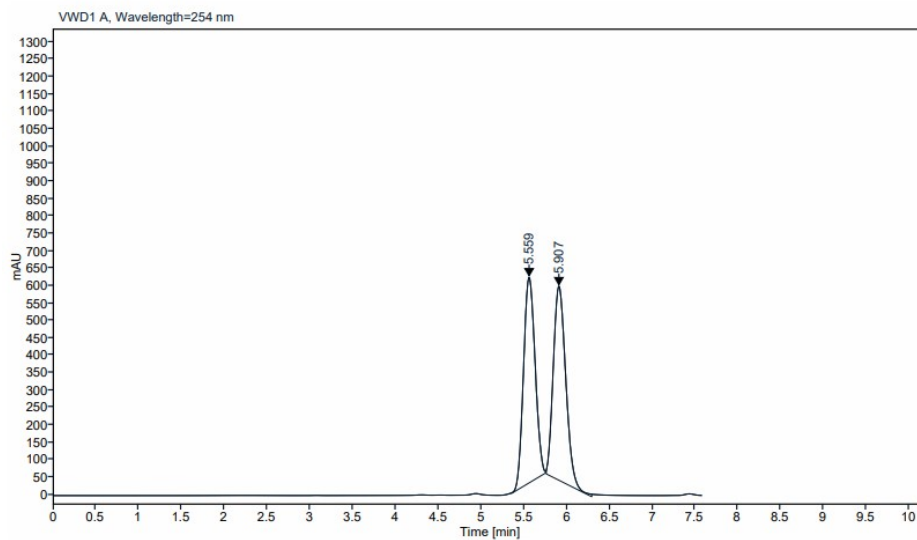

### Results

| No. | RT[min] | Area       | Height    | Relative Height % | Relative Area % |
|-----|---------|------------|-----------|-------------------|-----------------|
|     | 5.559   | 5557.3530  | 591.0151  | 51.46             | 49.69           |
|     | 5.907   | 5626.6729  | 557.5571  | 48.54             | 50.31           |
| SUM | 11.466  | 11184.0259 | 1148.5722 | 100.00            | 100.00          |

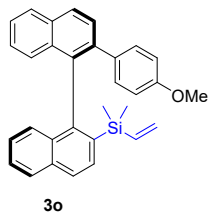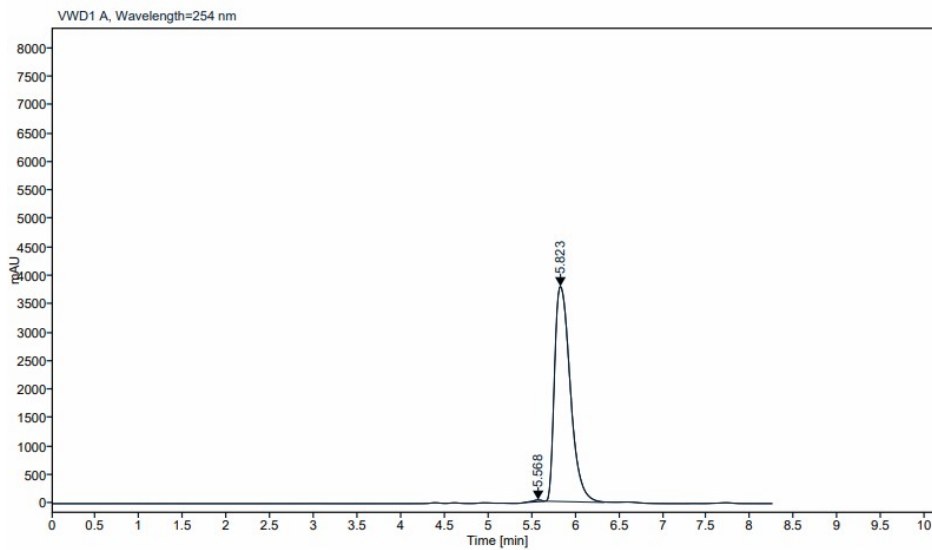

### Results

| No. | RT[min] | Area       | Height    | Relative Height % | Relative Area % |
|-----|---------|------------|-----------|-------------------|-----------------|
|     | 5.568   | 233.3791   | 32.6100   | 0.86              | 0.49            |
|     | 5.823   | 47431.0977 | 3780.0911 | 99.14             | 99.51           |
| SUM | 11.391  | 47664.4768 | 3812.7010 | 100.00            | 100.00          |

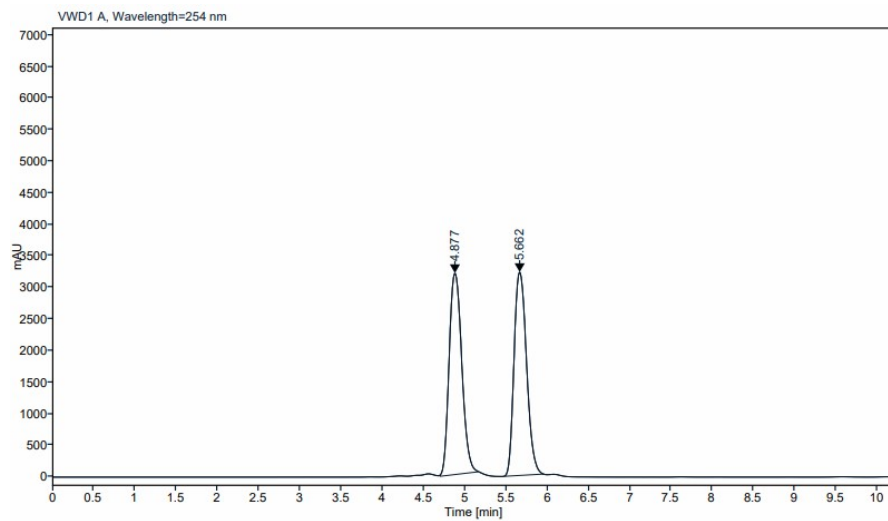

### Results

| No. | RT[min] | Area       | Height    | Relative Height % | Relative Area % |
|-----|---------|------------|-----------|-------------------|-----------------|
|     | 4.877   | 33916.2656 | 3189.6772 | 49.76             | 49.99           |
|     | 5.662   | 33923.0703 | 3220.5688 | 50.24             | 50.01           |
| SUM | 10.539  | 67839.3359 | 6410.2461 | 100.00            | 100.00          |

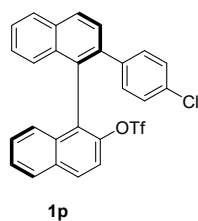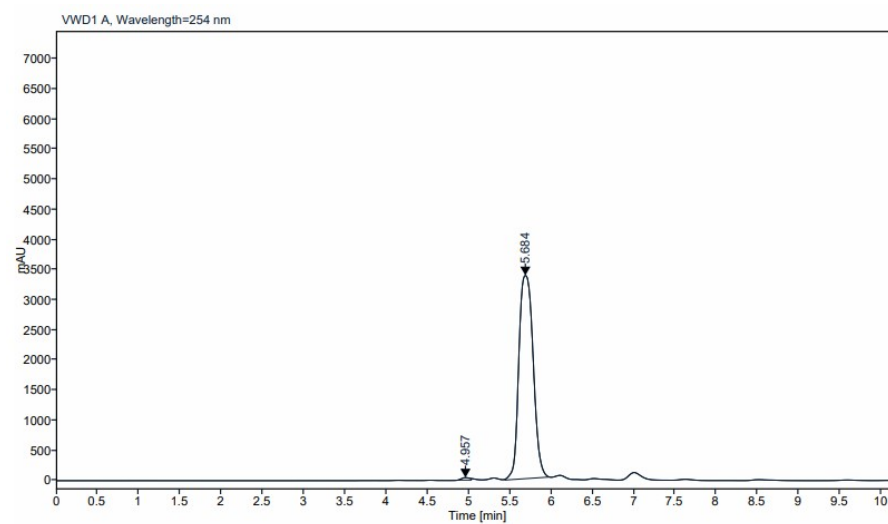

### Results

| No. | RT[min] | Area       | Height    | Relative Height % | Relative Area % |
|-----|---------|------------|-----------|-------------------|-----------------|
|     | 4.957   | 270.3477   | 40.5305   | 截图(A119-A)        | 0.66            |
|     | 5.684   | 40648.3633 | 3374.9700 | 98.81             | 99.34           |
| SUM | 10.641  | 40918.7110 | 3415.5005 | 100.00            | 100.00          |



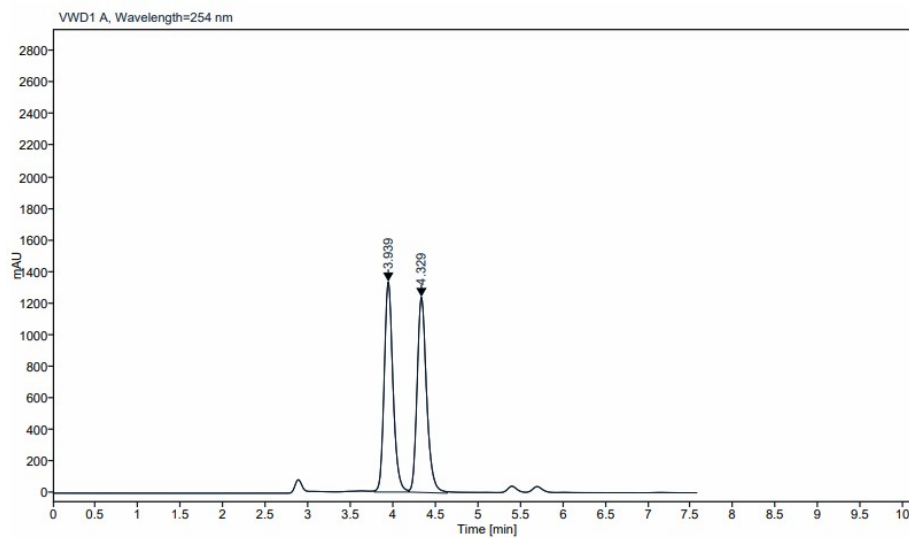

### Results

| No. | RT[min] | Area       | Height    | Relative Height % | Relative Area % |
|-----|---------|------------|-----------|-------------------|-----------------|
|     | 3.939   | 9606.0117  | 1335.9635 | 51.85             | 49.86           |
|     | 4.329   | 9660.1992  | 1240.4542 | 48.15             | 50.14           |
| SUM | 8.268   | 19266.2109 | 2576.4177 | 100.00            | 100.00          |

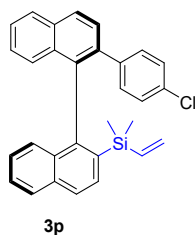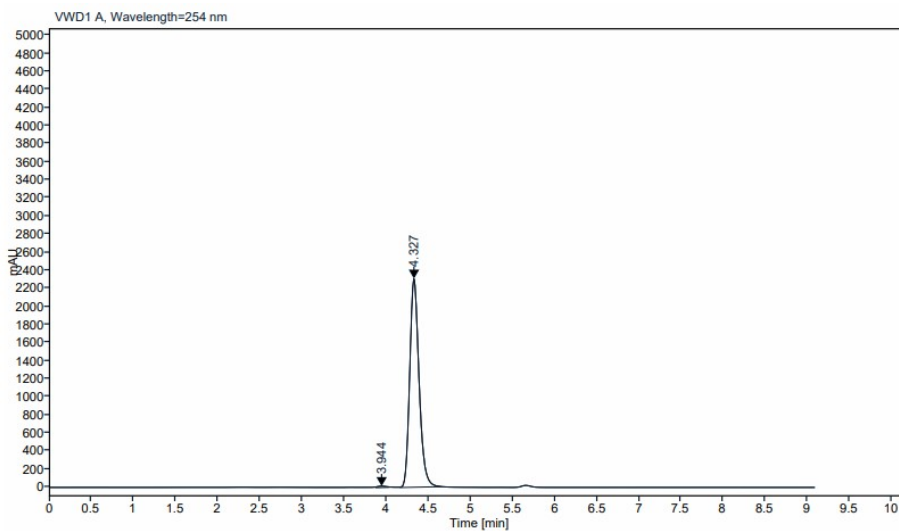

### Results

| No. | RT[min] | Area       | Height    | Relative Height % | Relative Area % |
|-----|---------|------------|-----------|-------------------|-----------------|
|     | 3.944   | 107.8018   | 15.4704   | 0.67              | 0.60            |
|     | 4.327   | 17790.1094 | 2306.8118 | 99.33             | 99.40           |
| SUM | 8.271   | 17897.9112 | 2322.2822 | 100.00            | 100.00          |

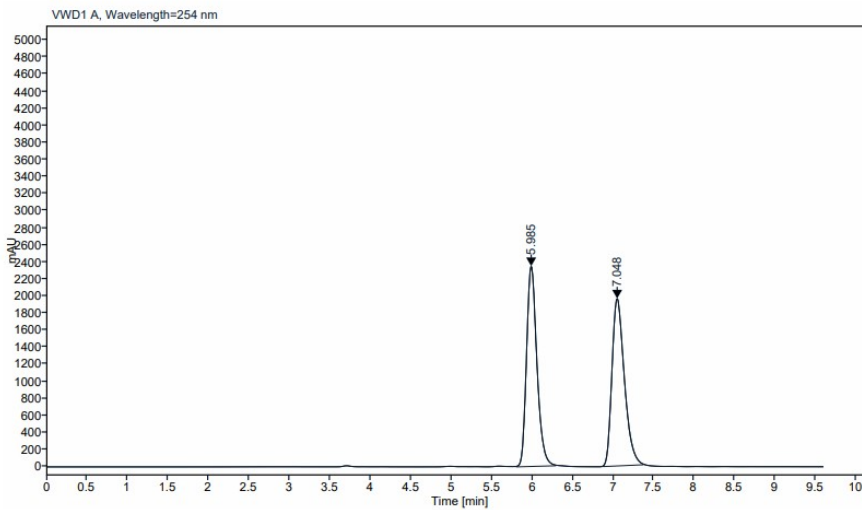

### Results

| No. | RT[min] | Area       | Height    | Relative Height % | Relative Area % |
|-----|---------|------------|-----------|-------------------|-----------------|
|     | 5.985   | 20883.8809 | 2347.8438 | 54.47             | 49.94           |
|     | 7.048   | 20930.1621 | 1962.7592 | 45.53             | 50.06           |
| SUM | 13.033  | 41814.0430 | 4310.6029 | 100.00            | 100.00          |

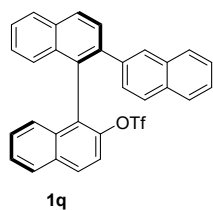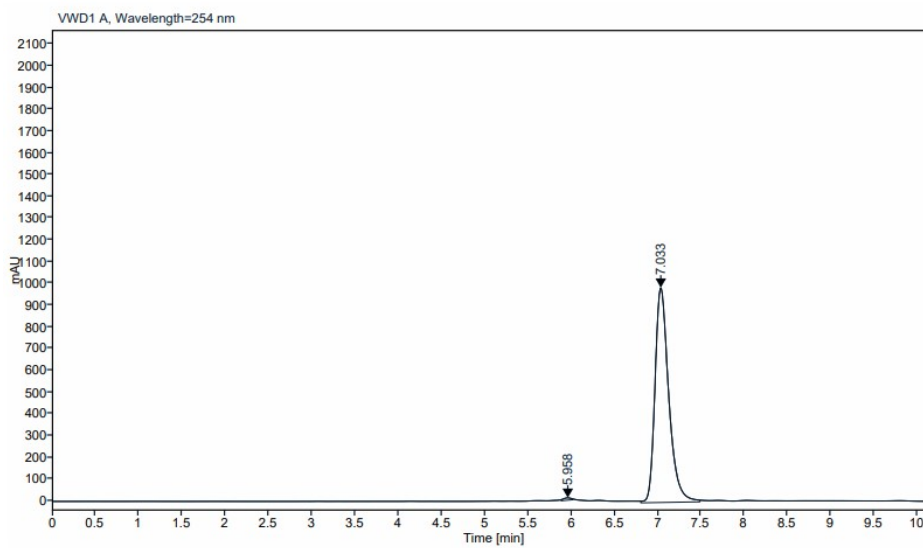

### Results

| No. | RT[min] | Area       | Height   | Relative Height % | Relative Area % |
|-----|---------|------------|----------|-------------------|-----------------|
|     | 5.958   | 66.7539    | 10.8133  | 1.08              | 0.61            |
|     | 7.033   | 10912.7168 | 987.5244 | 98.92             | 99.39           |
| SUM | 12.991  | 10979.4707 | 998.3377 | 100.00            | 100.00          |

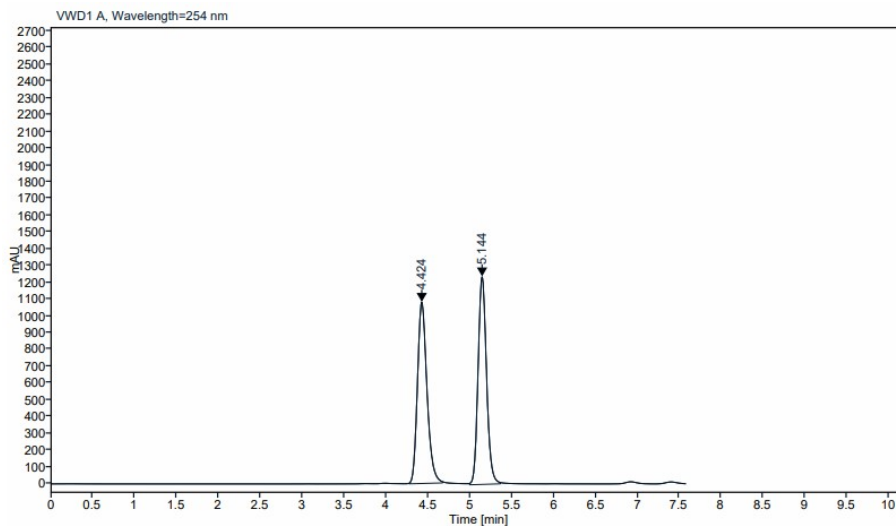

### Results

| No. | RT[min] | Area       | Height    | Relative Height % | Relative Area % |
|-----|---------|------------|-----------|-------------------|-----------------|
|     | 4.424   | 8564.3818  | 1083.6571 | 46.62             | 49.63           |
|     | 5.144   | 8690.7979  | 1240.7925 | 53.38             | 50.37           |
| SUM | 9.568   | 17255.1797 | 2324.4496 | 100.00            | 100.00          |

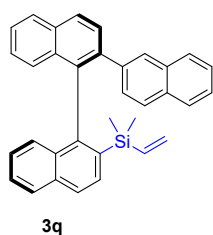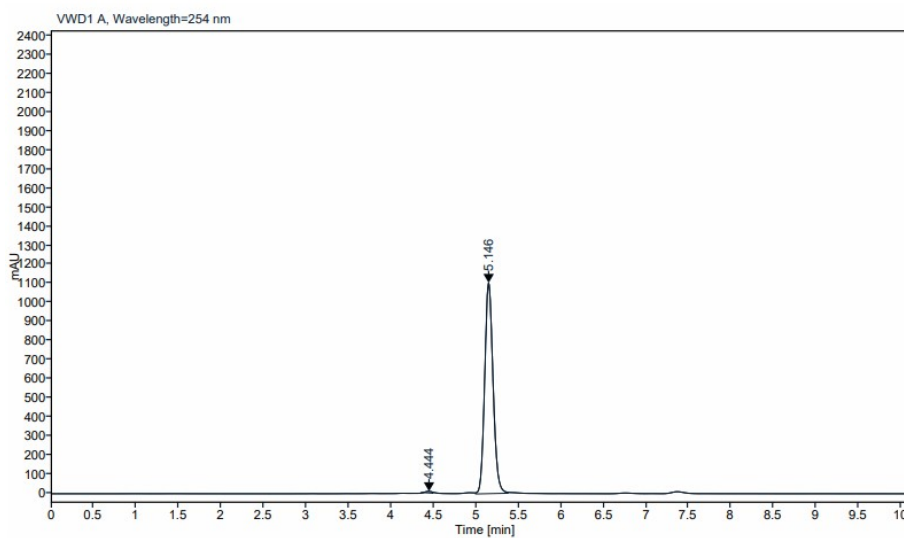

### Results

| No. | RT[min] | Area      | Height    | Relative Height % | Relative Area % |
|-----|---------|-----------|-----------|-------------------|-----------------|
|     | 4.444   | 41.8848   | 8.1755    | 0.73              | 0.55            |
|     | 5.146   | 7585.3687 | 1104.9607 | 99.27             | 99.45           |
| SUM | 9.590   | 7627.2534 | 1113.1362 | 100.00            | 100.00          |

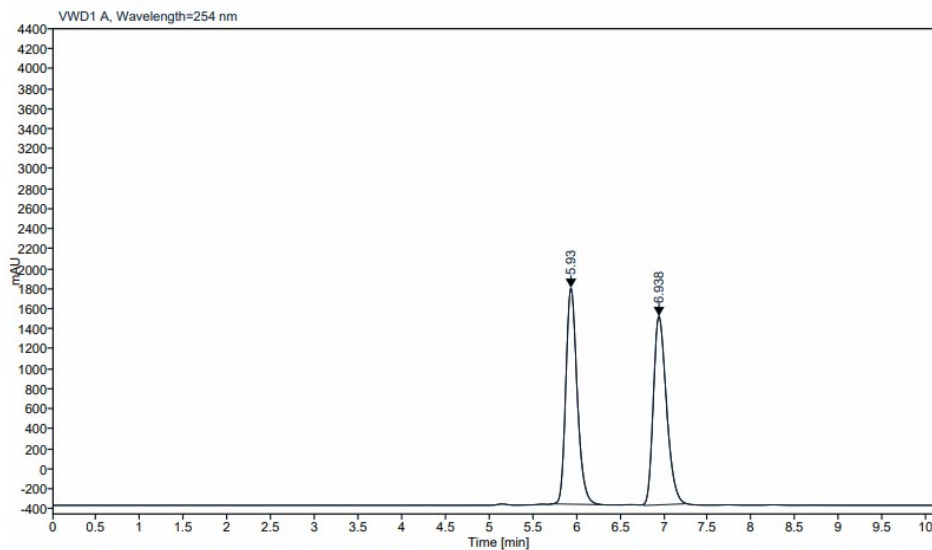

### Results

| No. | RT[min] | Area       | Height    | Relative Height % | Relative Area % |
|-----|---------|------------|-----------|-------------------|-----------------|
|     | 5.930   | 19525.3047 | 2161.5571 | 53.40             | 49.75           |
|     | 6.938   | 19720.4688 | 1886.6270 | 46.60             | 50.25           |
| SUM | 12.868  | 39245.7734 | 4048.1841 | 100.00            | 100.00          |

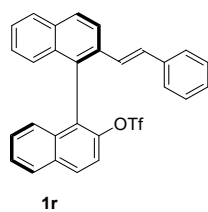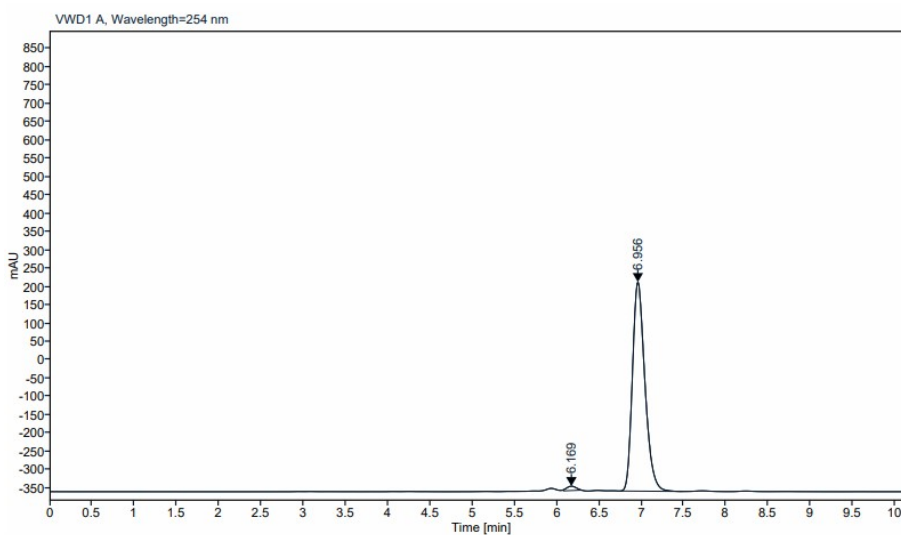

### Results

| No. | RT[min] | Area      | Height   | Relative Height % | Relative Area % |
|-----|---------|-----------|----------|-------------------|-----------------|
|     | 6.169   | 91.9719   | 11.9383  | 2.05              | 1.54            |
|     | 6.956   | 5867.6118 | 570.5962 | 97.95             | 98.46           |
| SUM | 13.125  | 5959.5837 | 582.5345 | 100.00            | 100.00          |

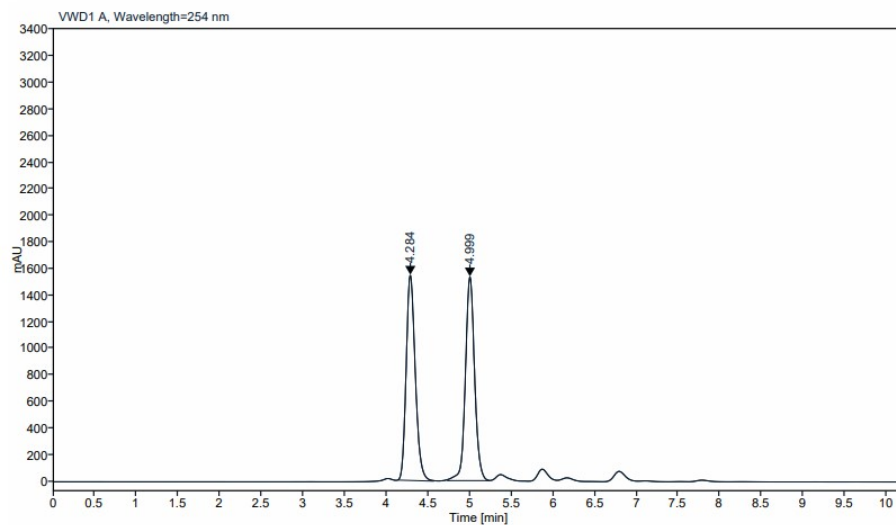

### Results

| No. | RT[min] | Area       | Height    | Relative Height % | Relative Area % |
|-----|---------|------------|-----------|-------------------|-----------------|
|     | 4.284   | 11728.9375 | 1547.1804 | 50.19             | 49.97           |
|     | 4.999   | 11744.6738 | 1535.4314 | 49.81             | 50.03           |
| SUM | 9.283   | 23473.6113 | 3082.6118 | 100.00            | 100.00          |

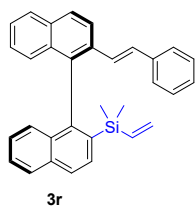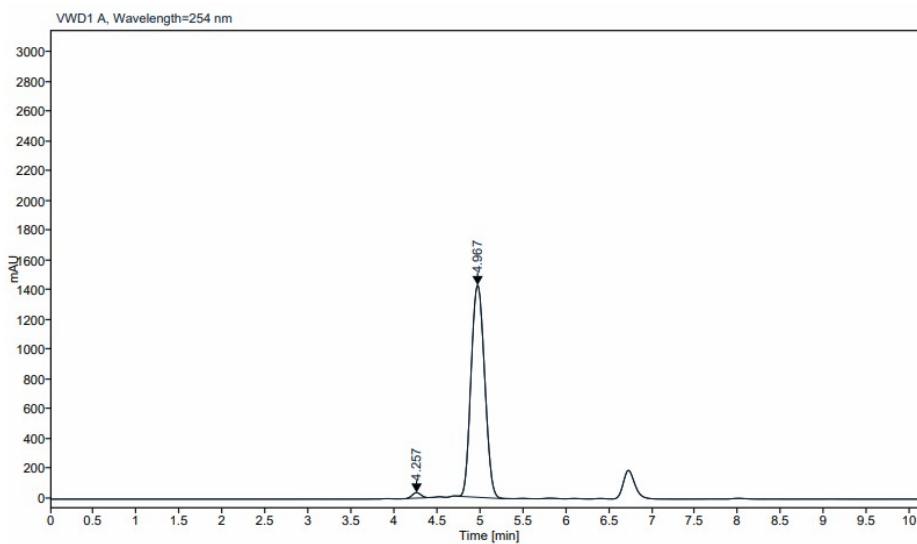

### Results

| No. | RT[min] | Area       | Height    | Relative Height % | Relative Area % |
|-----|---------|------------|-----------|-------------------|-----------------|
|     | 4.257   | 258.1785   | 36.5465   | 2.50              | 1.62            |
|     | 4.967   | 15704.0313 | 1427.2317 | 97.50             | 98.38           |
| SUM | 9.224   | 15962.2097 | 1463.7782 | 100.00            | 100.00          |

### <Chromatogram>

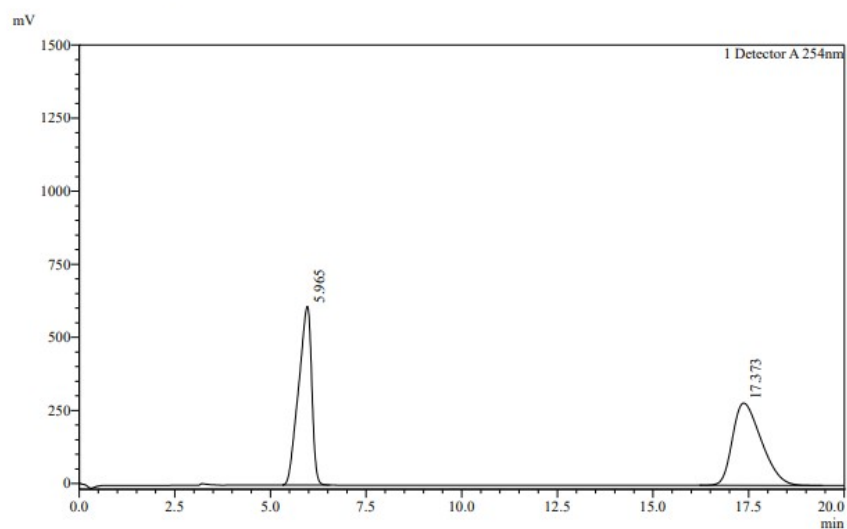

### <Peak Table>

| Detector A 254nm |           |          |        |        |         |
|------------------|-----------|----------|--------|--------|---------|
| Peak#            | Ret. Time | Area     | Height | Conc.  | Area%   |
| 1                | 5.965     | 14575580 | 610976 | 49.686 | 49.686  |
| 2                | 17.373    | 14760062 | 281383 | 50.314 | 50.314  |
| Total            |           | 29335641 | 892359 |        | 100.000 |

### <Chromatogram>

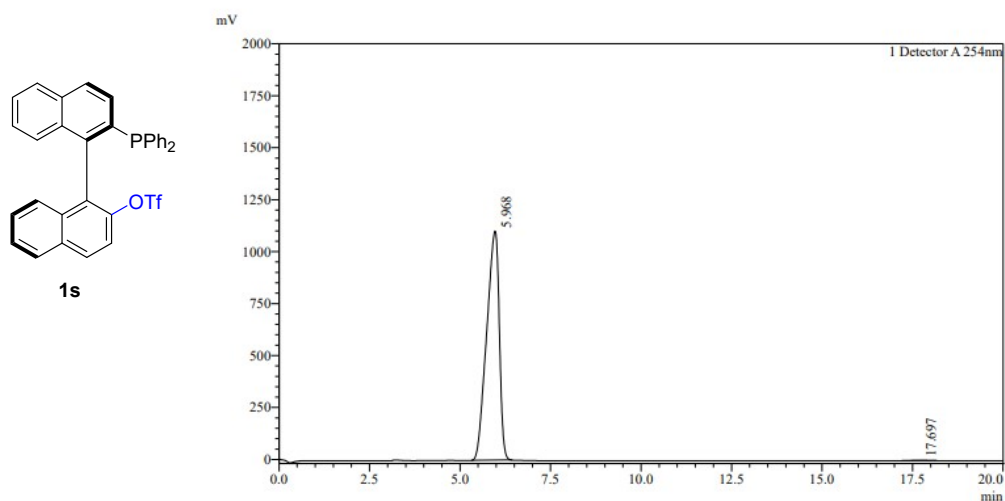

### <Peak Table>

| Detector A 254nm |           |          |         |        |         |
|------------------|-----------|----------|---------|--------|---------|
| Peak#            | Ret. Time | Area     | Height  | Conc.  | Area%   |
| 1                | 5.968     | 26666130 | 1102150 | 99.815 | 99.815  |
| 2                | 17.697    | 49482    | 1486    | 0.185  | 0.185   |
| Total            |           | 26715612 | 1103636 |        | 100.000 |

### <Chromatogram>

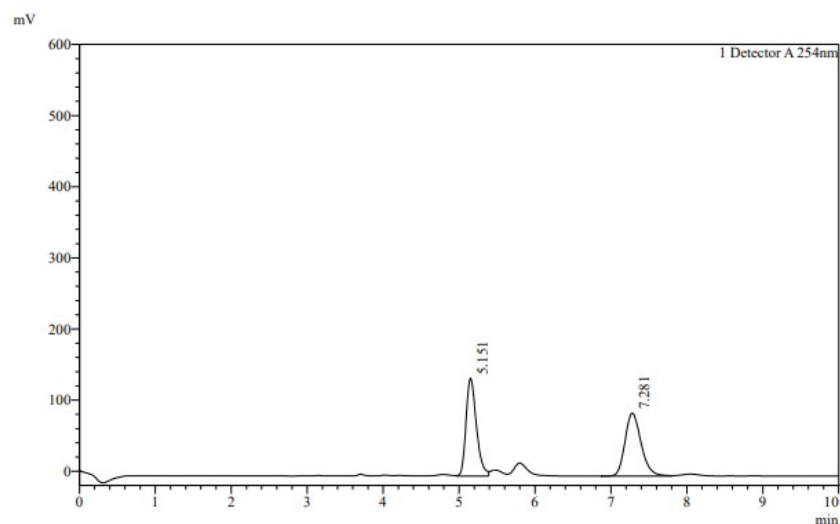

### <Peak Table>

| Detector A 254nm |           |         |        |        |         |
|------------------|-----------|---------|--------|--------|---------|
| Peak#            | Ret. Time | Area    | Height | Conc.  | Area%   |
| 1                | 5.151     | 1307041 | 137594 | 49.950 | 49.950  |
| 2                | 7.281     | 1309660 | 88506  | 50.050 | 50.050  |
| Total            |           | 2616702 | 226100 |        | 100.000 |

### <Chromatogram>

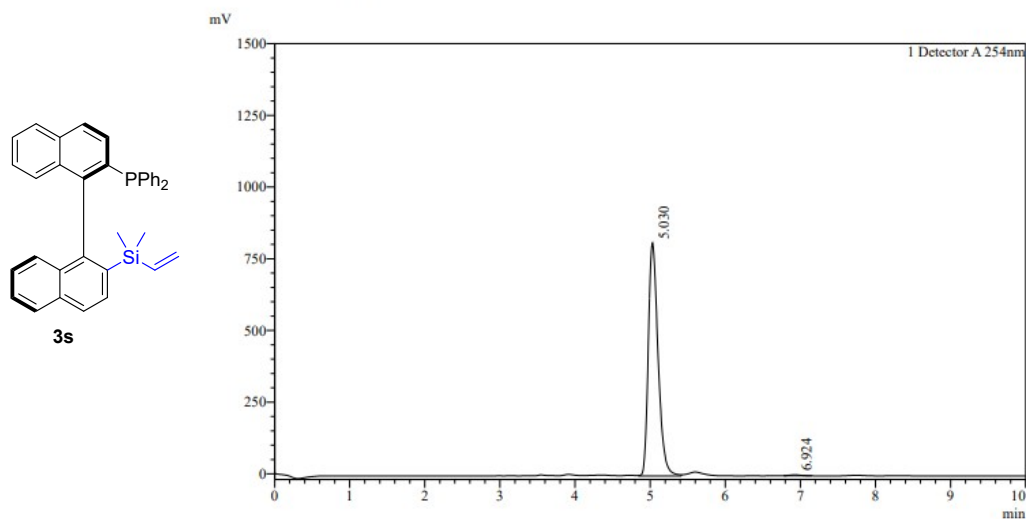

### <Peak Table>

| Detector A 254nm |           |         |        |        |         |
|------------------|-----------|---------|--------|--------|---------|
| Peak#            | Ret. Time | Area    | Height | Conc.  | Area%   |
| 1                | 5.030     | 7352804 | 813011 | 99.588 | 99.588  |
| 2                | 6.924     | 30442   | 2880   | 0.412  | 0.412   |
| Total            |           | 7383247 | 815892 |        | 100.000 |

### <Chromatogram>

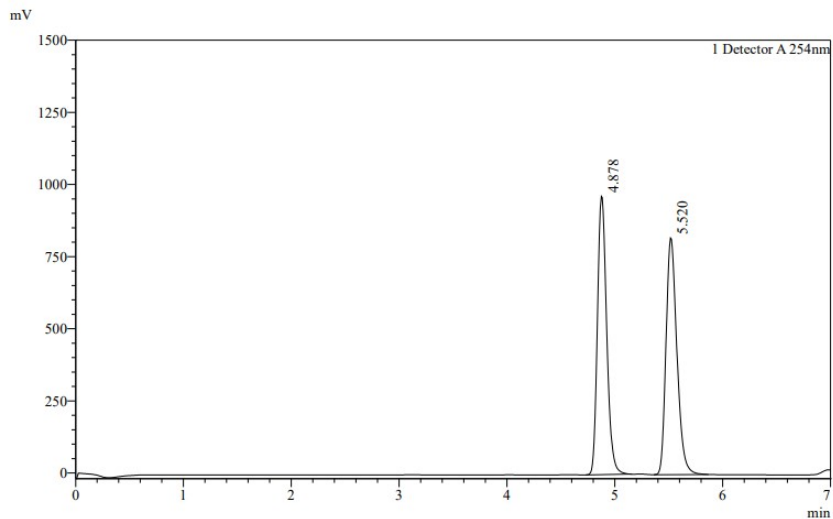

### <Peak Table>

| Peak# | Ret. Time | Area     | Height  | Conc.  | Area%   |
|-------|-----------|----------|---------|--------|---------|
| 1     | 4.878     | 5744048  | 964240  | 49.986 | 49.986  |
| 2     | 5.520     | 5747179  | 819944  | 50.014 | 50.014  |
| Total |           | 11491226 | 1784184 |        | 100.000 |

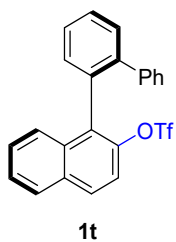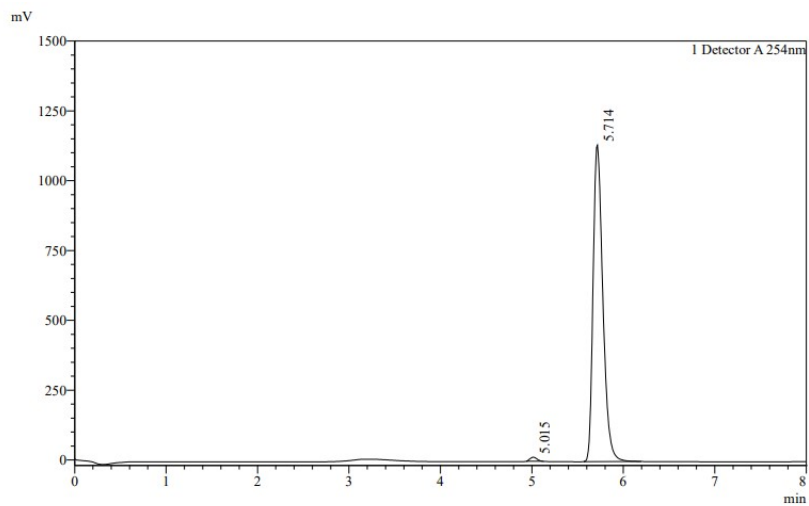

### <Peak Table>

| Peak# | Ret. Time | Area    | Height  | Conc.  | Area%   |
|-------|-----------|---------|---------|--------|---------|
| 1     | 5.015     | 73809   | 14291   | 0.869  | 0.869   |
| 2     | 5.714     | 8415884 | 1132590 | 99.131 | 99.131  |
| Total |           | 8489693 | 1146881 |        | 100.000 |



### <Chromatogram>

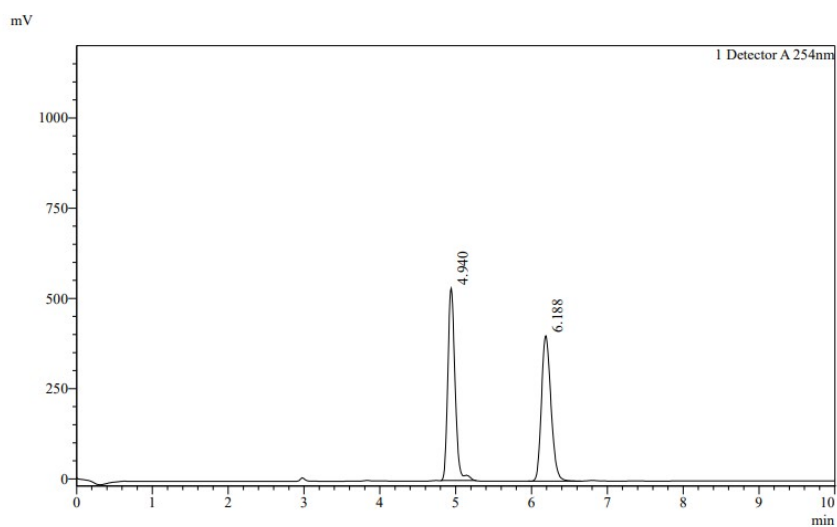

### <Peak Table>

| Detector A 254nm |           |         |        |        |         |
|------------------|-----------|---------|--------|--------|---------|
| Peak#            | Ret. Time | Area    | Height | Conc.  | Area%   |
| 1                | 4.940     | 3534561 | 532792 | 50.054 | 50.054  |
| 2                | 6.188     | 3526968 | 402748 | 49.946 | 49.946  |
| Total            |           | 7061529 | 935540 |        | 100.000 |

### <Chromatogram>

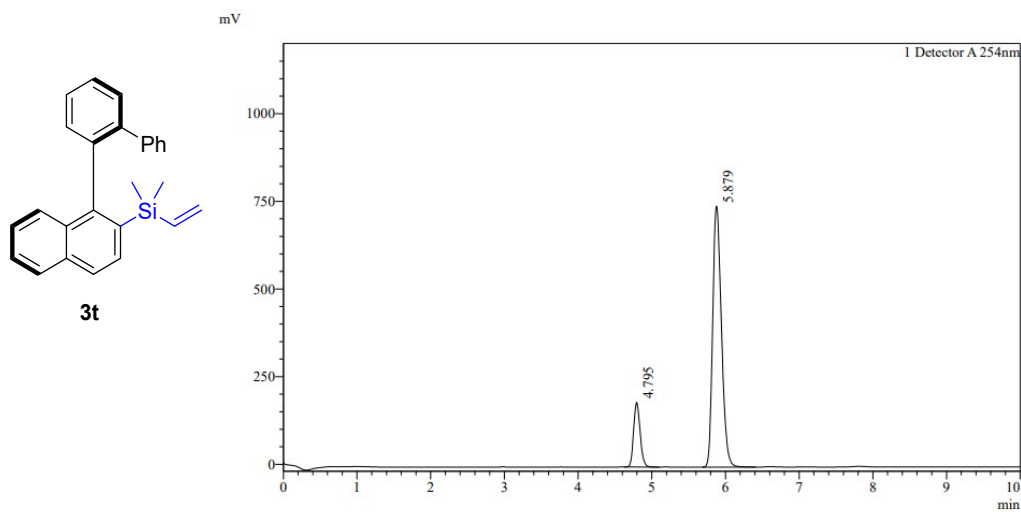

### <Peak Table>

| Detector A 254nm |           |         |        |        |         |
|------------------|-----------|---------|--------|--------|---------|
| Peak#            | Ret. Time | Area    | Height | Conc.  | Area%   |
| 1                | 4.795     | 1137451 | 183975 | 15.630 | 15.630  |
| 2                | 5.879     | 6140056 | 743584 | 84.370 | 84.370  |
| Total            |           | 7277507 | 927559 |        | 100.000 |

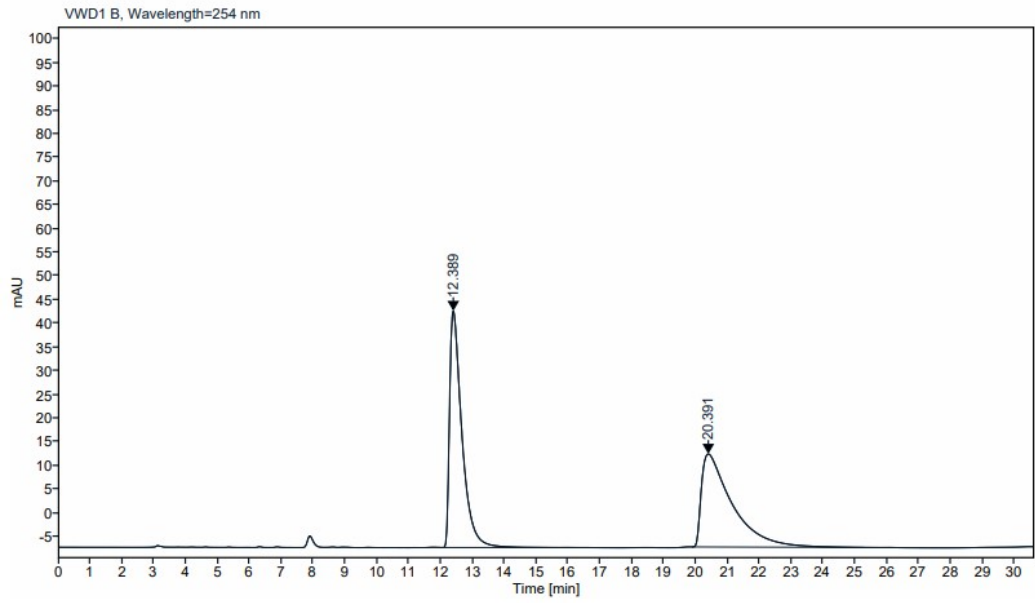

**Results**

| No. | RT[min] | Area      | Height  | Relative Height % | Relative Area % |
|-----|---------|-----------|---------|-------------------|-----------------|
|     | 12.389  | 1341.6210 | 49.8848 | 71.78             | 50.56           |
|     | 20.391  | 1311.7988 | 19.6132 | 28.22             | 49.44           |
| SUM | 32.779  | 2653.4198 | 69.4980 | 100.00            | 100.00          |

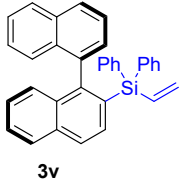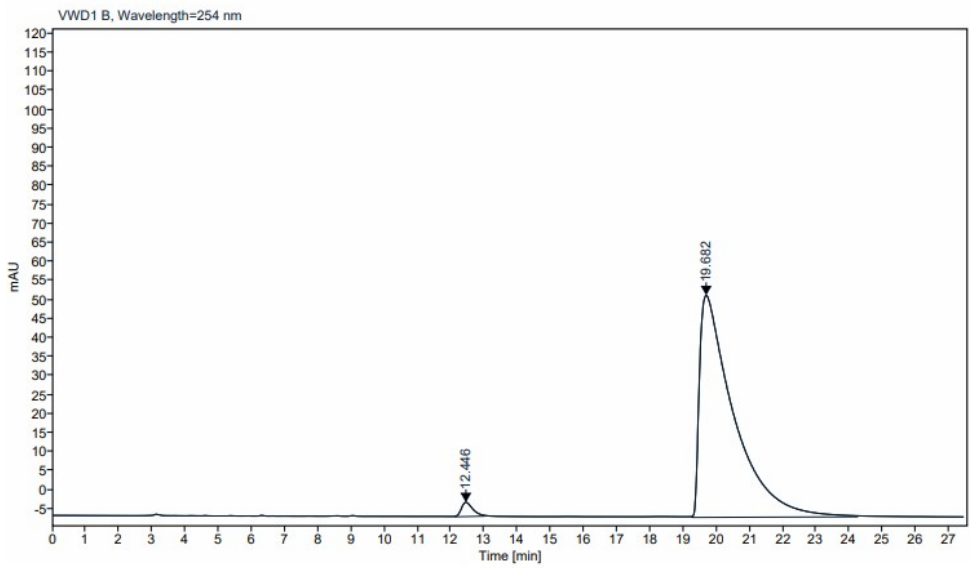

**Results**

| No. | RT[min] | Area      | Height  | Relative Height % | Relative Area % |
|-----|---------|-----------|---------|-------------------|-----------------|
|     | 12.446  | 90.2758   | 3.7501  | 6.03              | 2.11            |
|     | 19.682  | 4179.4590 | 58.4201 | 93.97             | 97.89           |
| SUM | 32.128  | 4269.7348 | 62.1702 | 100.00            | 100.00          |

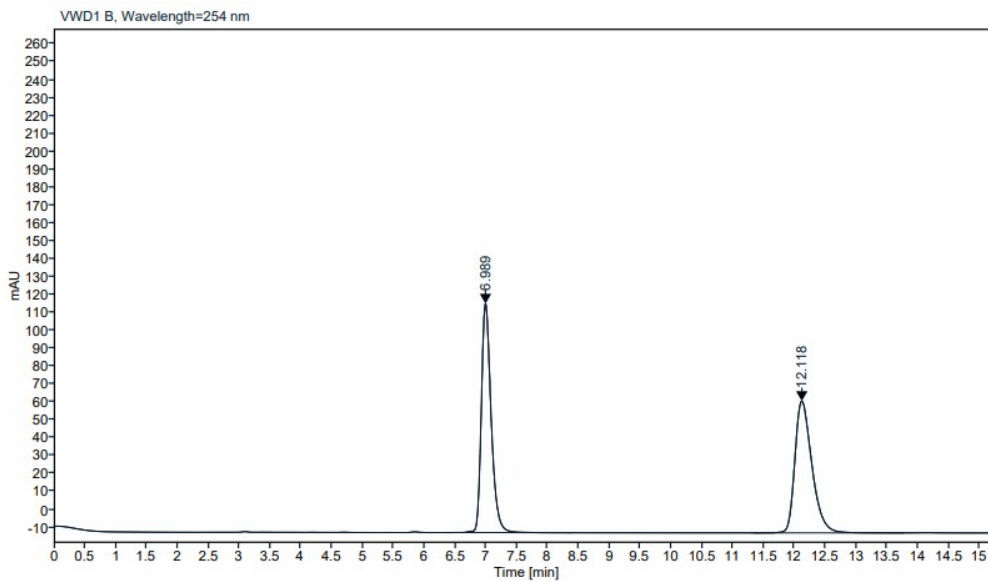

**Results**

| No. | RT[min] | Area      | Height   | Relative Height % | Relative Area % |
|-----|---------|-----------|----------|-------------------|-----------------|
|     | 6.989   | 1408.8342 | 127.8256 | 63.46             | 49.92           |
|     | 12.118  | 1413.5310 | 73.6089  | 36.54             | 50.08           |
| SUM | 19.107  | 2822.3652 | 201.4345 | 100.00            | 100.00          |

截图(Alt + A)

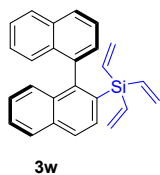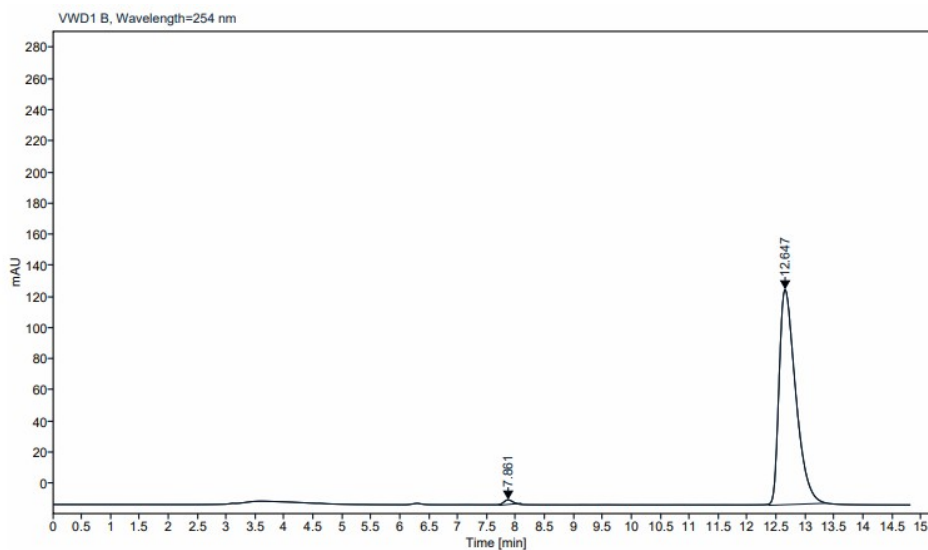

**Results**

| No. | RT[min] | Area      | Height   | Relative Height % | Relative Area % |
|-----|---------|-----------|----------|-------------------|-----------------|
|     | 7.861   | 30.3597   | 2.9986   | 2.12              | 1.09            |
|     | 12.647  | 2752.3108 | 138.2171 | 97.88             | 98.91           |
| SUM | 20.507  | 2782.6705 | 141.2156 | 100.00            | 100.00          |

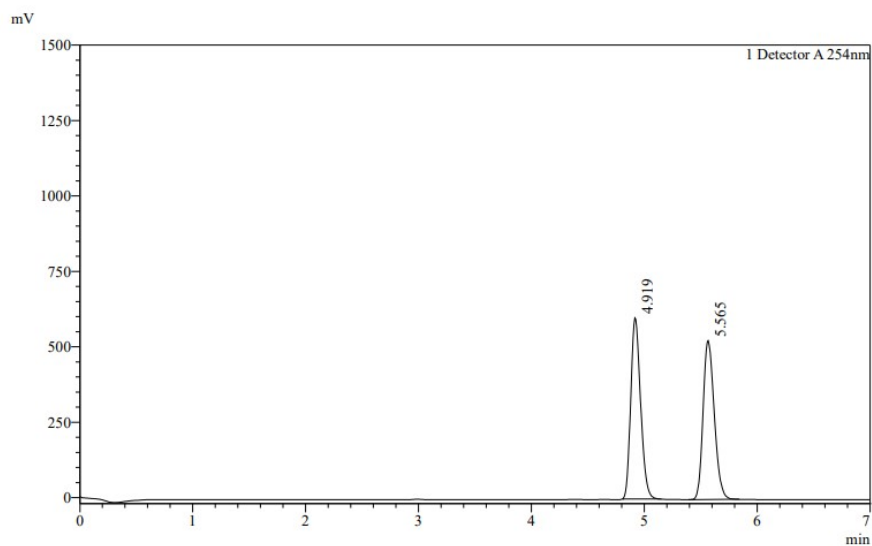

**<Peak Table>**

| Detector A 254nm |           |         |         |        |         |
|------------------|-----------|---------|---------|--------|---------|
| Peak#            | Ret. Time | Area    | Height  | Conc.  | Area%   |
| 1                | 4.919     | 3635918 | 600077  | 50.008 | 50.008  |
| 2                | 5.565     | 3634753 | 525954  | 49.992 | 49.992  |
| Total            |           | 7270671 | 1126031 |        | 100.000 |

**<Chromatogram>**

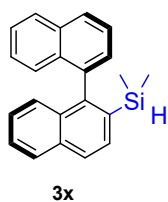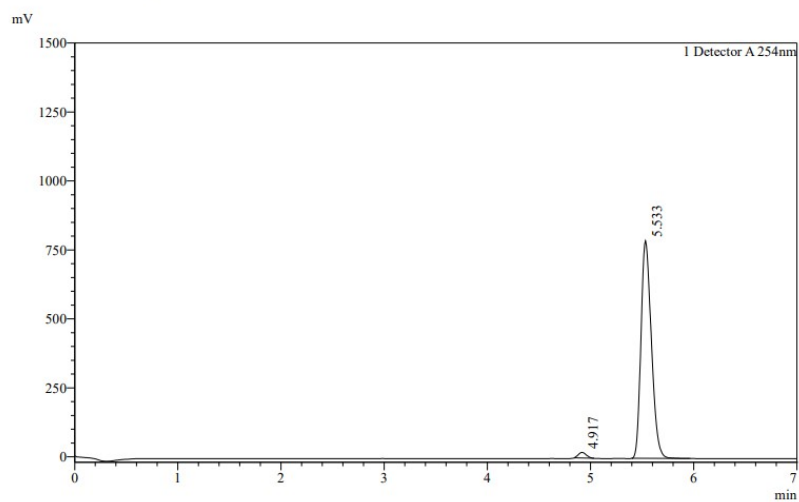

**<Peak Table>**

| Detector A 254nm |           |         |        |        |         |
|------------------|-----------|---------|--------|--------|---------|
| Peak#            | Ret. Time | Area    | Height | Conc.  | Area%   |
| 1                | 4.917     | 109467  | 20468  | 1.942  | 1.942   |
| 2                | 5.533     | 5528061 | 788212 | 98.058 | 98.058  |
| Total            |           | 5637527 | 808680 |        | 100.000 |
